# Supplementary material for: Concise synthesis of rare pyrido[1,2-a]pyrimidin-2-ones and related nitrogen-rich bicyclic scaffolds with a ring-junction nitrogen
Source: Royal Society of Chemistry journal article supplement (doi:10.1039/c5ob01784j), 2015-11-24
Supplement: c5ob01784j1.pdf [file c5ob01784j1.pdf]

## *Electronic Supplementary Information*

### **Concise synthesis of rare pyrido[1,2-*a*]pyrimidin-2-ones and related nitrogen-rich bicyclic scaffolds with a ring-junction nitrogen**

T. A. Alanine,<sup>a</sup> W. R. J. D. Galloway,<sup>a</sup> S. Bartlett,<sup>a</sup> J. J. Ciardiello,<sup>a</sup> T. M. McGuire,  
and D. R. Spring<sup>a</sup>

<sup>a</sup>Department of Chemistry, University of Cambridge, Lensfield Road, Cambridge, CB2 1EW, UK.

Email: spring@ch.cam.ac.uk; Fax: +44 (0)1223-336362

<sup>b</sup>AstraZeneca UK Ltd., Alderly Park, Macclesfield, Cheshire, SK10, UK.

#### ***Table of contents:***

|                                                                                                   |    |
|---------------------------------------------------------------------------------------------------|----|
| General experimental details.....                                                                 | 3  |
| General methods .....                                                                             | 6  |
| General method 1: Acylation of aminoazines.....                                                   | 6  |
| General method 2: Cyclisation of heterocyclic amides .....                                        | 6  |
| Experimental details and NMR spectra .....                                                        | 7  |
| <i>N</i> -(2-Pyridyl)but-2-ynamide ( <b>25</b> ).....                                             | 7  |
| <i>N</i> -(4-(trifluoromethyl)pyridin-2-yl)but-2-ynamide ( <b>43</b> ).....                       | 9  |
| <i>N</i> -(4-ethylpyridin-2-yl)but-2-ynamide ( <b>44</b> ).....                                   | 11 |
| <i>N</i> -(4-Bromopyridin-2-yl)but-2-ynamide ( <b>45</b> ).....                                   | 13 |
| <i>N</i> -(4-cyanopyridin-2-yl)but-2-ynamide ( <b>46</b> ).....                                   | 15 |
| <i>N</i> -(4-chloropyridin-2-yl)but-2-ynamide ( <b>47</b> ).....                                  | 17 |
| <i>N</i> -(4-methylpyridin-2-yl)but-2-ynamide ( <b>48</b> ).....                                  | 19 |
| <i>N</i> -(4-phenylpyridin-2-yl)but-2-ynamide ( <b>49</b> ).....                                  | 21 |
| Ethyl 2-(but-2-ynamido)isonicotinate ( <b>50</b> ).....                                           | 23 |
| <i>N</i> -(4-Methoxypyridin-2-yl)but-2-ynamide ( <b>51</b> ).....                                 | 25 |
| <i>N</i> -(6-Methoxypyridazin-3-yl)but-2-ynamide ( <b>52</b> ).....                               | 27 |
| <i>N</i> -(Pyrazin-2-yl)but-2-ynamide ( <b>53</b> ).....                                          | 30 |
| <i>N</i> -(6-Chloropyrazin-2-yl)but-2-ynamide ( <b>54</b> ).....                                  | 32 |
| <i>N</i> -(6-Methoxypyrimidin-4-yl)but-2-ynamide ( <b>55</b> ).....                               | 34 |
| <i>N</i> -(5-Bromopyrimidin-2-yl)but-2-ynamide ( <b>56</b> ).....                                 | 36 |
| <i>N</i> -(Quinolin-2-yl)but-2-ynamide ( <b>57</b> ).....                                         | 39 |
| <i>N</i> -(4,6-bis(ethylthio)pyrimidin-2-yl)but-2-ynamide ( <b>58</b> ).....                      | 41 |
| 9-(Benzyloxy)-4-methyl-2 <i>H</i> -pyrido[1,2- <i>a</i> ]pyrimidin-2-one ( <b>62</b> ).....       | 43 |
| 4-Methyl-2 <i>H</i> -pyrimido[1,2- <i>a</i> ]pyrimidin-2-one ( <b>63</b> ).....                   | 46 |
| 9-Ethoxy-4-methyl-2 <i>H</i> -pyrazino[1,2- <i>a</i> ]pyrimidin-2-one ( <b>64</b> ).....          | 48 |
| 4-(Trifluoromethyl)-2 <i>H</i> -pyrido[1,2- <i>a</i> ]pyrimidin-2-one ( <b>66</b> ).....          | 50 |
| 4-Methyl-2 <i>H</i> -pyrido[1,2- <i>a</i> ]pyrimidin-2-one ( <b>67</b> ).....                     | 53 |
| 4-Methyl-8-(trifluoromethyl)-2 <i>H</i> -pyrido[1,2- <i>a</i> ]pyrimidin-2-one ( <b>68</b> )..... | 55 |

|                                                                                            |    |
|--------------------------------------------------------------------------------------------|----|
| 8-Ethyl-4-methyl-2H-pyrido[1,2-a]pyrimidin-2-one ( <b>69</b> ) .....                       | 58 |
| 8-Bromo-4-methyl-2 <i>H</i> -pyrido[1,2-a]pyrimidin-2-one ( <b>70</b> ).....               | 60 |
| 4-Methyl-2-oxo-2 <i>H</i> -pyrido[1,2-a]pyrimidine-8-carbonitrile ( <b>71</b> ).....       | 63 |
| 8-Chloro-4-methyl-2 <i>H</i> -pyrido[1,2-a]pyrimidin-2-one ( <b>72</b> ).....              | 65 |
| 4,8-Dimethyl-2 <i>H</i> -pyrido[1,2-a]pyrimidin-2-one ( <b>73</b> ) .....                  | 68 |
| 4-Methyl-8-phenyl-2H-pyrido[1,2-a]pyrimidin-2-one ( <b>74</b> ) .....                      | 70 |
| Ethyl 4-methyl-2-oxo-2 <i>H</i> -pyrido[1,2-a]pyrimidine-8-carboxylate ( <b>75</b> ) ..... | 72 |
| 8-Methoxy-4-methyl-2H-pyrido[1,2-a]pyrimidin-2-one ( <b>76</b> ) .....                     | 75 |
| 7-Methoxy-4-methyl-2 <i>H</i> -pyrimido[1,2-b]pyridazin-2-one ( <b>77</b> ).....           | 77 |
| 4-Methyl-2 <i>H</i> -pyrazino[1,2-a]pyrimidin-2-one ( <b>78</b> ) .....                    | 79 |
| 8-Methoxy-4-methyl-2 <i>H</i> -pyrimido[1,6-a]pyrimidin-2-one ( <b>79</b> ) .....          | 81 |
| 1-Methyl-3H-pyrimido[1,2-a]quinolin-3-one ( <b>80</b> ) .....                              | 83 |
| References.....                                                                            | 85 |

## General experimental details

All non-aqueous reactions were performed under a constant stream of dry nitrogen using oven-dried glassware. Standard practices were employed when handling moisture and air-sensitive materials.

Room temperature (r.t.) refers to ambient temperature. All temperatures below 0 °C are those of the external baths. Temperatures of 0 °C were maintained using an ice-water bath. Temperatures below 0 °C were maintained using an acetone-cardice bath (-78 °C) or acetonitrile-cardice (-40 °C).

All reagents and solvents were used as received unless otherwise stated. Toluene was distilled from calcium hydride. Tetrahydrofuran was dried over sodium metal wire and distilled from a mixture of lithium aluminium hydride and calcium hydride with triphenylmethane as indicator. Petroleum ether was distilled before use. *n*-Butyllithium in hexanes and LDA (2.0 M in THF/heptane/ethylbenzene) (Aldrich) were titrated with *N*-benzylbenzamide before use.<sup>1</sup> Sodium hydride was used without hexane washes. Magnesium turnings were used for the preparation of all Grignard reagents.

Yields refer to chromatographically and spectroscopically pure compounds (purity of at least 95%) unless otherwise stated, in which case corrected with respect to percentage weight purity (in cases where a purity is stated). Where possible, reactions were monitored by thin layer chromatography (TLC) performed on commercially prepared glass plates pre-coated with Merck silica gel 60 F254 or aluminium oxide 60 F254. Visualisation was by the quenching of UV fluorescence ( $\lambda_{\text{max}} = 254 \text{ nm}$ ) or by staining with potassium permanganate or by liquid chromatography mass spectrometry (LC-MS) using a Waters Micromass ZQ spectrometer. Retention factors ( $R_f$ ) are quoted to 0.01.

Flash column chromatography was carried out using slurry-packed Merck 9385 Kieselgel 60 SiO<sub>2</sub> (230-400 mesh) under a positive pressure of compressed air, or Combiflash Companion automated purification columns (GRADE silica columns).

Melting points were obtained on a Buchi B-545 melting point apparatus and are uncorrected.

Infrared spectra were recorded on a Perkin-Elmer Spectrum One spectrometer with internal referencing. Selected absorption maxima ( $\nu_{\max}$ ) are reported in wavenumbers ( $\text{cm}^{-1}$ ) with the following abbreviations: w, weak; med, medium; str, strong; br, broad.

Proton magnetic resonance spectra were recorded using an internal deuterium lock at ambient probe temperatures (unless otherwise stated) on the following instruments: Bruker DPX-400 (400 MHz), Bruker Avance 400 QNP (400 MHz) and Bruker Avance 500 Cryo Ultrashield (500 MHz). Chemical shifts ( $\delta_{\text{H}}$ ) are quoted in ppm, to the nearest 0.01 ppm, and are referenced to the residual non-deuterated solvent peak. Coupling constants ( $J$ ) are reported in Hertz (Hz) to the nearest 0.1 Hz. Data are reported as follows: chemical shift, integration, multiplicity (br = broad; s = singlet; d = doublet; t = triplet; q = quartet; m = multiplet; or as a combination of these), coupling constant(s) and assignment. The numbering/lettering on selected structures does not follow the IUPAC naming system and is used for the assignment of the  $^1\text{H}$  NMR and  $^{13}\text{C}$  NMR spectra. Proton assignments were determined either on the basis of unambiguous chemical shift, coupling pattern, by patterns observed in 2D experiments ( $^1\text{H}$ - $^1\text{H}$  COSY, HMBC and HMQC) or by analogy to fully interpreted spectra for related compounds.

Carbon magnetic resonance spectra were recorded by broadband proton spin decoupling at ambient probe temperatures using an internal deuterium lock on the following instruments: Bruker DPX-400 (100 MHz), Bruker Avance 400 QNP (100 MHz) and Bruker Avance 500 Cryo Ultrashield (125 MHz). Chemical shifts ( $\delta_{\text{C}}$ ) are quoted in ppm, to the nearest 0.1 ppm, and are referenced to the residual non-deuterated solvent peak. Assignment was based on chemical shift, DEPT editing and where appropriate, HMQC and HMBC experiments or by analogy to fully interpreted spectra of related compounds.

Fluorine magnetic resonance spectra were recorded on a Bruker DPX-400 (162 MHz) instrument. Chemical shifts ( $\delta_F$ ) are quoted in ppm to the nearest 0.1 ppm and are referenced to  $CFCl_3$ .

High resolution mass spectrometry (HRMS) measurements were recorded on a Bruker Bioapex 4.7e FTICR or a Micromass LCT Premier spectrometer or a Waters Xevo G2 Qtof spectrometer. Mass values are quoted within the error limits of  $\pm 5$  ppm mass units. ToF ES+ or FTMS ESI+ refers to the mass ionisation technique.

Microwave reactions were carried out in a CEM Discover Microwave or in a Biotage Initiator Classic.

LC-MS chromatographs were recorded on an HP/Agilent MSD LC-MS APCI 120-1000 full gradient ACq T = 1 min 1  $\mu$ L. Retention times are reported to the nearest 0.1 min. Preparative HPLC chromatography was carried out on a Dionex Ultimate 3000 loaded with a Reprosil Chiral NR 250 x 4.6 mm column, eluting with an isocratic 40-60% EtOH/heptane (with 0.01 mol/L  $NH_4OAc$ ) over 60 mins or on a Reprosil Chiral NR 250 x 30 mm column, eluting with a 1.60 mL of the same conditions as above or on a Phenomenex Gemini-NX axia Prep C18 OBD column, 5 $\mu$  silica, 30 mm diameter, 100 mm length, using decreasingly polar mixtures of water (containing 1%  $NH_3$ ) and MeCN as eluents. Retention times are reported to the nearest 0.01 min.

## General methods

### General method 1: Acylation of aminoazines

To a stirred solution of aminoazine (1 eq.) in anhydrous THF (reaction molarity of approx. 0.25 M) at -78 °C was added dropwise the solution of lithium base (2.1 eq.). The reaction was left to stir at -78 °C for 30 mins. The electrophile (1.2 eq.) was then added at -78 °C, and the reaction was left to warm to room temperature over 1 hour. The reaction was then quenched with AcOH (approx. 1 mL) and diluted with CH<sub>2</sub>Cl<sub>2</sub> (approx. 20 mL) and water (approx. 20 mL). The organic layer was separated and the aqueous layer was washed with CH<sub>2</sub>Cl<sub>2</sub> (3 x 20 mL). The combined organic layers were then dried (MgSO<sub>4</sub>) and the solvent removed under reduced pressure at low temperature (<25 °C) to yield the crude product which was purified by column chromatography. Note – for highest and most reproducible yields reaction and purification should be carried out within six hours.

### General method 2: Cyclisation of heterocyclic amides

A stirred solution of heterocyclic ynone in DMSO was heated to 85 or 100 °C until TLC/LC-MS showed complete consumption of starting material (see manuscript for times and temperatures). The solvent was then removed under a stream of N<sub>2</sub> gas overnight and the residue purified by column chromatography or preparative HPLC if required.

## Experimental details and NMR spectra

### *N*-(2-Pyridyl)but-2-ynamide (**25**)

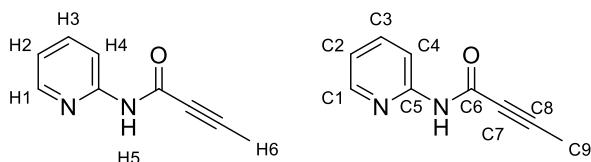

Prepared according to General Method 1 from 2-aminopyridine **23** (0.14 g, 1.43 mmol) *n*BuLi (1.88 mL, 3.00 mmol) and ethyl 2-butynoate **24** (0.20 mL, 1.72 mmol). The crude product was purified by Combiflash Companion (SiO<sub>2</sub>, 20 g, 0-50% EtOAc in heptane) to yield a yellow solid (0.10 g, 0.63 mmol, 44%). *R*<sub>f</sub> = 0.26 (1:1 heptane: EtOAc). Mpt (CH<sub>2</sub>Cl<sub>2</sub>): 130-131 °C. IR  $\nu_{\text{max}}/\text{cm}^{-1}$  (neat): 2956 (m, br, C-H/N-H), 2236 (med, C≡C), 1665 (str, C=O), 1581 (str, C=C), 1534 (str, C=C), 1437 (str, C=C). <sup>1</sup>H NMR (500 MHz, CDCl<sub>3</sub>):  $\delta_{\text{H}}$  9.15 (1H, br s, H5),  $\delta_{\text{H}}$  8.32 (1H, dd, *J* = 4.9, 0.9 Hz, H1),  $\delta_{\text{H}}$  8.17 (1H, d, *J* = 8.4 Hz, H4),  $\delta_{\text{H}}$  7.70 (1H, ddd, *J* = 8.4, 7.5, 1.9 Hz, H3),  $\delta_{\text{H}}$  7.03 (1H, ddd, *J* = 7.3, 5.0, 0.9 Hz, H2),  $\delta_{\text{H}}$  1.99 (3H, s, H6). <sup>13</sup>C NMR (125 MHz, CDCl<sub>3</sub>):  $\delta_{\text{C}}$  151.3 (C5),  $\delta_{\text{C}}$  151.2 (C6),  $\delta_{\text{C}}$  147.8 (C1),  $\delta_{\text{C}}$  138.6 (C3),  $\delta_{\text{C}}$  119.9 (C2),  $\delta_{\text{C}}$  114.8 (C4),  $\delta_{\text{C}}$  85.5 (C7),  $\delta_{\text{C}}$  75.3 (C8),  $\delta_{\text{C}}$  3.8 (C9). HRMS (TOF ES+) *m/z* found [M+H]<sup>+</sup> 161.0716, C<sub>9</sub>H<sub>9</sub>N<sub>2</sub>O<sup>+</sup> required 161.0715,  $\Delta$  ppm = 0.6 ppm.

$^1\text{H}$  NMR

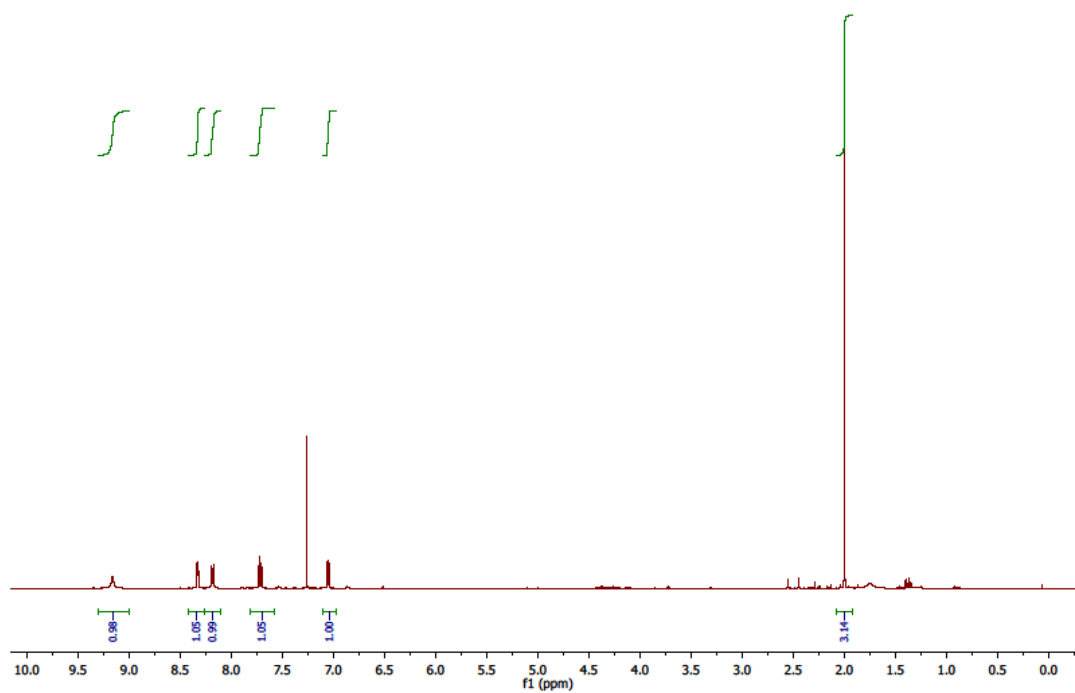

$^{13}\text{C}$  NMR

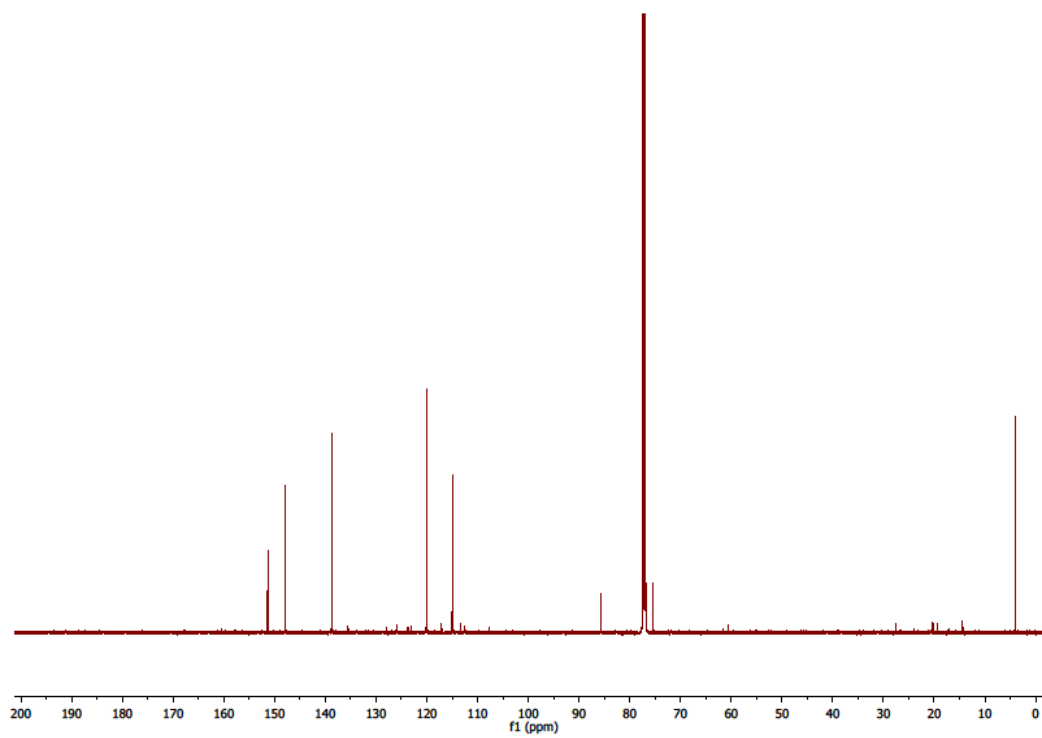



*N*-(4-(trifluoromethyl)pyridin-2-yl)but-2-ynamide (**43**)

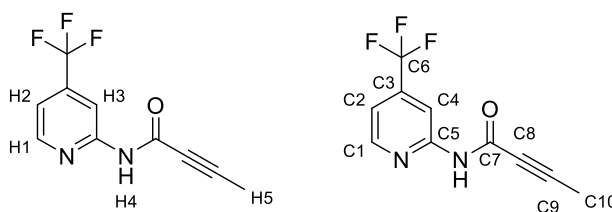

Prepared according to General Method 1 from 2-amino-4-(trifluoromethyl)pyridine **27** (0.10 g, 0.62 mmol), *n*BuLi (1.30 mmol) and ethyl 2-butynoate **24** (0.09 mL, 0.74 mmol). The crude product was purified by column chromatography (SiO<sub>2</sub>, 20 g, 4:1 then 7:3 40-60 petroleum ether: EtOAc) to yield a beige solid (0.11 g, 0.50 mmol, 82%). *R*<sub>f</sub> = 0.60 (1:1 40-60 petroleum ether: EtOAc). Mpt (CH<sub>2</sub>Cl<sub>2</sub>): darkens >120 °C, melts 129-131 °C. IR  $\nu_{\text{max}}/\text{cm}^{-1}$  (neat): 3165 (w, N-H/C-H), 3125 (w, C-H), 2979 (w, C-H), 2241 (med, C≡C), 1679 (med, C=O), 1670 (med, C=O), 1618 (w), 1579 (str, C=C), 1529 (str, C=C/C=N), 1467 (w), 1420 (str), 1336 (str), 1309 (w), 1291 (med), 1275 (str), 1230 (str), 1165 (str), 1127 (str), 1087 (str), 1068 (str). <sup>1</sup>H NMR (500 MHz, d<sup>6</sup>-DMSO):  $\delta_{\text{H}}$  11.55 (1H, s, H4),  $\delta_{\text{H}}$  8.60 (1H, d, *J* = 5.1 Hz, H1),  $\delta_{\text{H}}$  8.26 (1H, app s, H3),  $\delta_{\text{H}}$  7.48 (1H, dd, *J* = 5.1, 0.9 Hz, H2),  $\delta_{\text{H}}$  2.04 (3H, s, H5). <sup>13</sup>C NMR (125 MHz, d<sup>6</sup>-DMSO):  $\delta_{\text{C}}$  152.5 (C5),  $\delta_{\text{C}}$  151.8 (C7),  $\delta_{\text{C}}$  150.2 (C1),  $\delta_{\text{C}}$  138.4 (q, <sup>2</sup>*J*<sub>C-F</sub> = 33 Hz, C3),  $\delta_{\text{C}}$  122.8 (q, <sup>1</sup>*J*<sub>C-F</sub> = 273 Hz, C6),  $\delta_{\text{C}}$  115.3 (d, <sup>3</sup>*J*<sub>C-F</sub> = 3 Hz, C2),  $\delta_{\text{C}}$  109.6 (<sup>3</sup>*J*<sub>C-F</sub> = 4 Hz, C4),  $\delta_{\text{C}}$  87.0 (C8),  $\delta_{\text{C}}$  75.3 (C9),  $\delta_{\text{C}}$  3.5 (C10). <sup>19</sup>F NMR (162 MHz, d<sup>6</sup>-DMSO):  $\delta_{\text{F}}$  -63.91 (s, CF<sub>3</sub>). HRMS (FTMS ESI+) *m/z* found [M+H]<sup>+</sup> 229.0579, C<sub>10</sub>H<sub>8</sub>ON<sub>2</sub>F<sub>3</sub><sup>+</sup> required 229.0579,  $\Delta$  ppm = -2.1 ppm.

# $^1\text{H}$ NMR

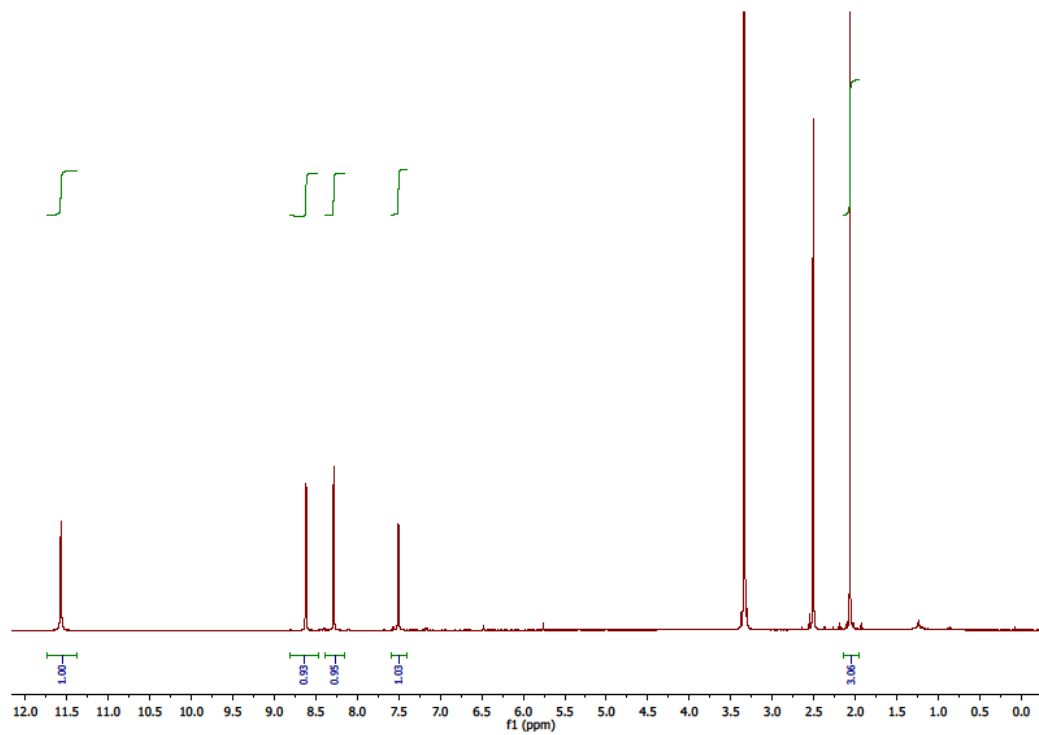

# $^{13}\text{C}$ NMR

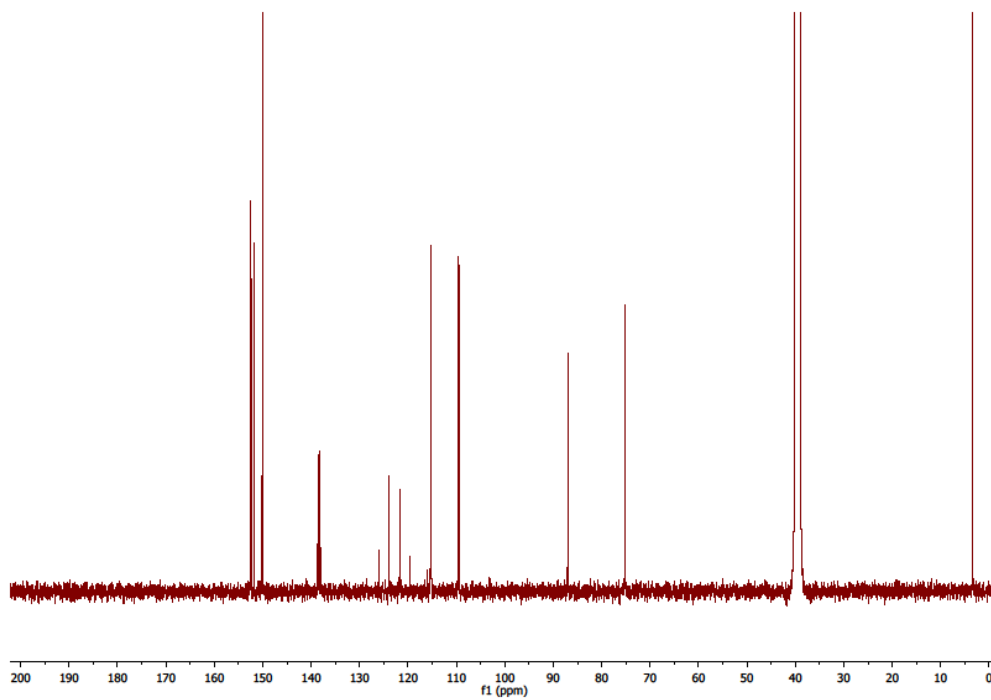

## *N*-(4-ethylpyridin-2-yl)but-2-ynamide (**44**)

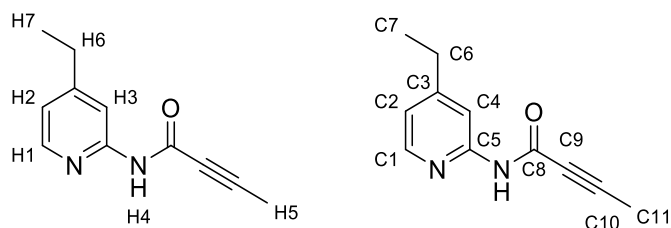

Prepared according to General Method 1 from 2-amino-4-ethylpyridine **28** (0.30 g, 2.46 mmol), *n*BuLi (5.16 mmol) and ethyl 2-butynoate **24** (0.34 mL, 2.95 mmol). The crude product was purified by column chromatography (SiO<sub>2</sub>, 20 g, 7:3 40-60 petroleum ether: EtOAc) to yield a yellow solid (0.20 g, 90% purity, 0.98 mmol, 40%). *R<sub>f</sub>* = 0.50 (1:1 40-60 petroleum ether: EtOAc). Mpt (CH<sub>2</sub>Cl<sub>2</sub>): 112-114 °C. IR  $\nu_{\text{max}}/\text{cm}^{-1}$  (neat): 3100 (w, N-H/C-H), 3031 (w, C-H), 2972 (w, C-H), 2938 (w, C-H), 2781 (w), 2243 (w, C≡C), 2228 (w, C≡C), 1695 (w), 1660 (str, C=O), 1610 (med, C=C), 1565 (str, C=C), 1530 (str, C=C/C=N), 1466 (w), 1453 (w), 1416 (str), 1377 (w), 1296 (med), 1284 (w), 1270 (med), 1251 (str), 1164 (med), 1122 (w), 1071 (w), 1061 (w), 1001 (w). <sup>1</sup>H NMR (500 MHz, d<sup>6</sup>-DMSO):  $\delta_{\text{H}}$  10.94 (1H, s, H4),  $\delta_{\text{H}}$  8.18 (1H, d, *J* = 5.0 Hz, H1),  $\delta_{\text{H}}$  7.82 (1H, app s, H3),  $\delta_{\text{H}}$  6.98 (1H, dd, *J* = 5.0, 1.5 Hz, H2),  $\delta_{\text{H}}$  2.59 (2H, q, *J* = 7.5 Hz, H6),  $\delta_{\text{H}}$  2.01 (3H, s, H5),  $\delta_{\text{H}}$  1.15 (3H, t, *J* = 7.5 Hz, H7). <sup>13</sup>C NMR (125 MHz, d<sup>6</sup>-DMSO):  $\delta_{\text{C}}$  154.8 (C3),  $\delta_{\text{C}}$  151.7 (C8),  $\delta_{\text{C}}$  151.3 (C5),  $\delta_{\text{C}}$  147.9 (C1),  $\delta_{\text{C}}$  119.8 (C2),  $\delta_{\text{C}}$  113.8 (C4), 85.6 (C9),  $\delta_{\text{C}}$  75.6 (C10),  $\delta_{\text{C}}$  27.8 (C6),  $\delta_{\text{C}}$  14.4 (C7),  $\delta_{\text{C}}$  3.4 (C11). HRMS (TOF ES+) *m/z* found [M+H]<sup>+</sup> 189.1030, C<sub>11</sub>H<sub>13</sub>ON<sub>2</sub><sup>+</sup> required 189.1028,  $\Delta$  ppm = 1.1 ppm.

$^1\text{H}$  NMR

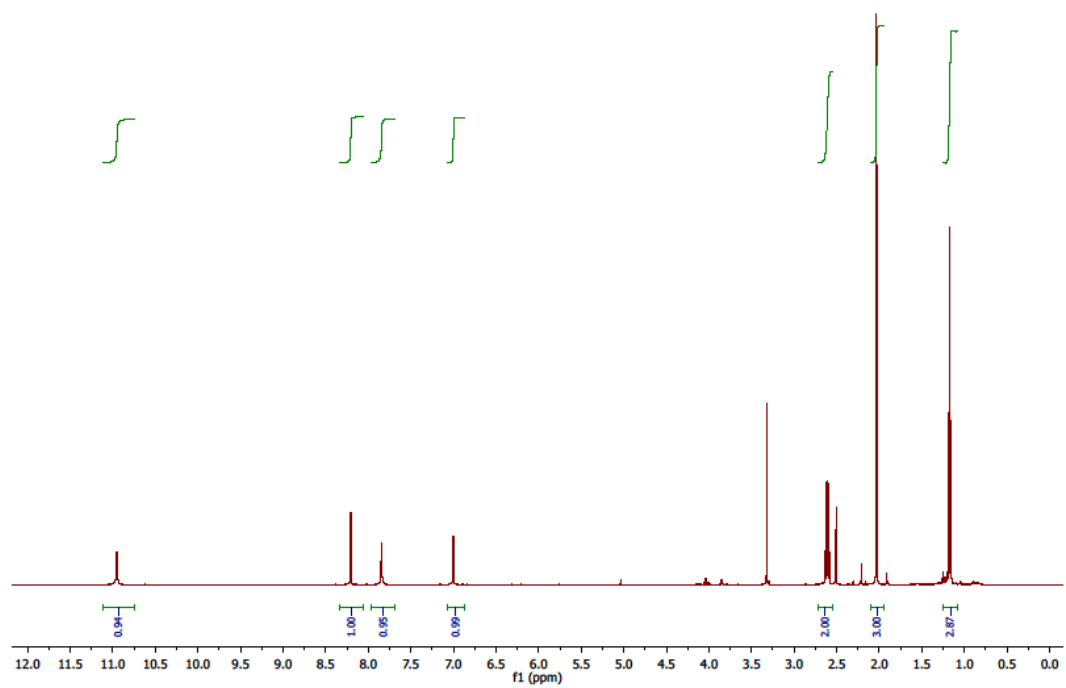

$^{13}\text{C}$  NMR

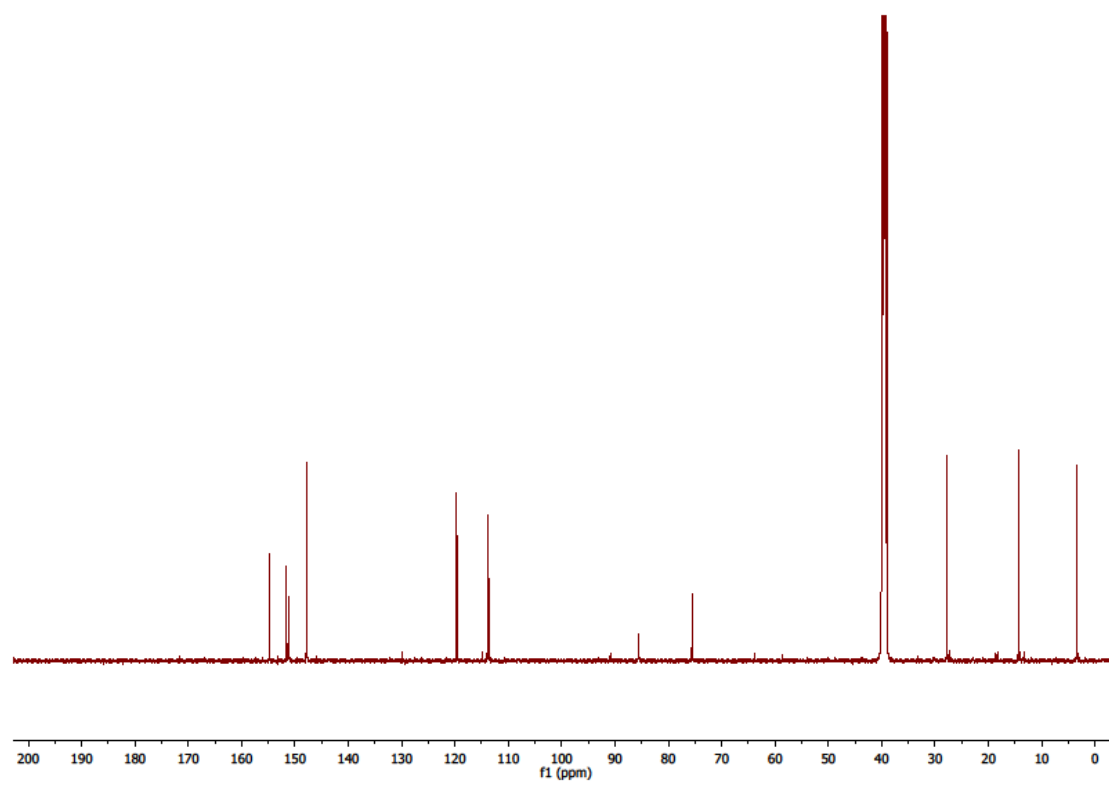

## *N*-(4-Bromopyridin-2-yl)but-2-ynamide (**45**)

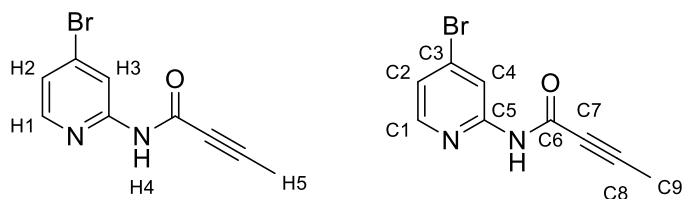

Prepared according to General Method 1 from 2-amino-4-bromopyridine **29** (1 g, 5.78 mmol), LDA (12.14 mmol) and ethyl 2-butynoate **24** (0.808 mL, 6.94 mmol). The crude product was purified by column chromatography (SiO<sub>2</sub>, 0 to 30% EtOAc in heptane) to yield a yellow solid (0.698 g, 51%). This can be titrated with heptane if required.  $R_f = 0.65$  (1:1 40-60 petroleum ether: EtOAc). Mpt (CH<sub>2</sub>Cl<sub>2</sub>): darkens >160 °C, melts 227-230 °C. IR  $\nu_{\max}/\text{cm}^{-1}$  (neat): 3199 (w, C-H/N-H), 3147 (w, C-H/N-H), 3052 (w, C-H), 3010 (w, C-H), 2236 (med, C≡C), 1659 (str, C=O), 1571 (str, C=C), 1511 (str, C=C), 1455 (w), 1419 (w), 1402 (str), 1290 (med), 1271 (str), 1251 (med), 1224 (med), 1122 (w), 1093 (med), 1066 (med), 1026 (w). <sup>1</sup>H NMR (500 MHz, d<sup>6</sup>-DMSO):  $\delta_H$  11.31 (1H, s, H4),  $\delta_H$  8.24 (1H, d,  $J = 5.3$  Hz, H1),  $\delta_H$  8.21 (1H, d,  $J = 1.2$  Hz, H3),  $\delta_H$  7.40 (1H, dd,  $J = 5.3, 1.8$  Hz, H2),  $\delta_H$  2.05 (3H, s, H5). <sup>13</sup>C NMR (125 MHz, d<sup>6</sup>-DMSO):  $\delta_C$  152.4 (C5),  $\delta_C$  151.6 (C6),  $\delta_C$  149.5 (C1),  $\delta_C$  133.1 (C3),  $\delta_C$  122.9 (C2),  $\delta_C$  117.0 (C4), 86.8 (C7),  $\delta_C$  75.3 (C8),  $\delta_C$  3.5 (C9). HRMS (TOF ES+)  $m/z$  found [M+H]<sup>+</sup> 238.9825, C<sub>9</sub>H<sub>8</sub>ON<sub>2</sub><sup>79</sup>Br<sup>+</sup> required 238.9820,  $\Delta$  ppm = 2.1 ppm.

$^1\text{H}$  NMR

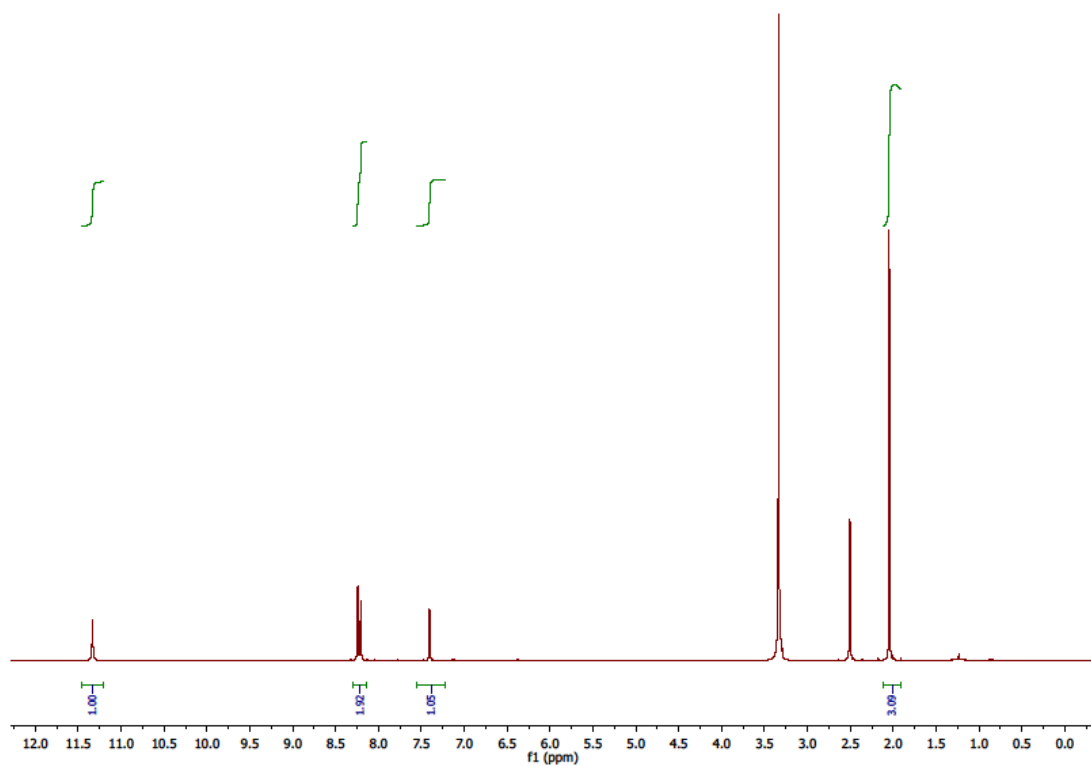

$^{13}\text{C}$  NMR

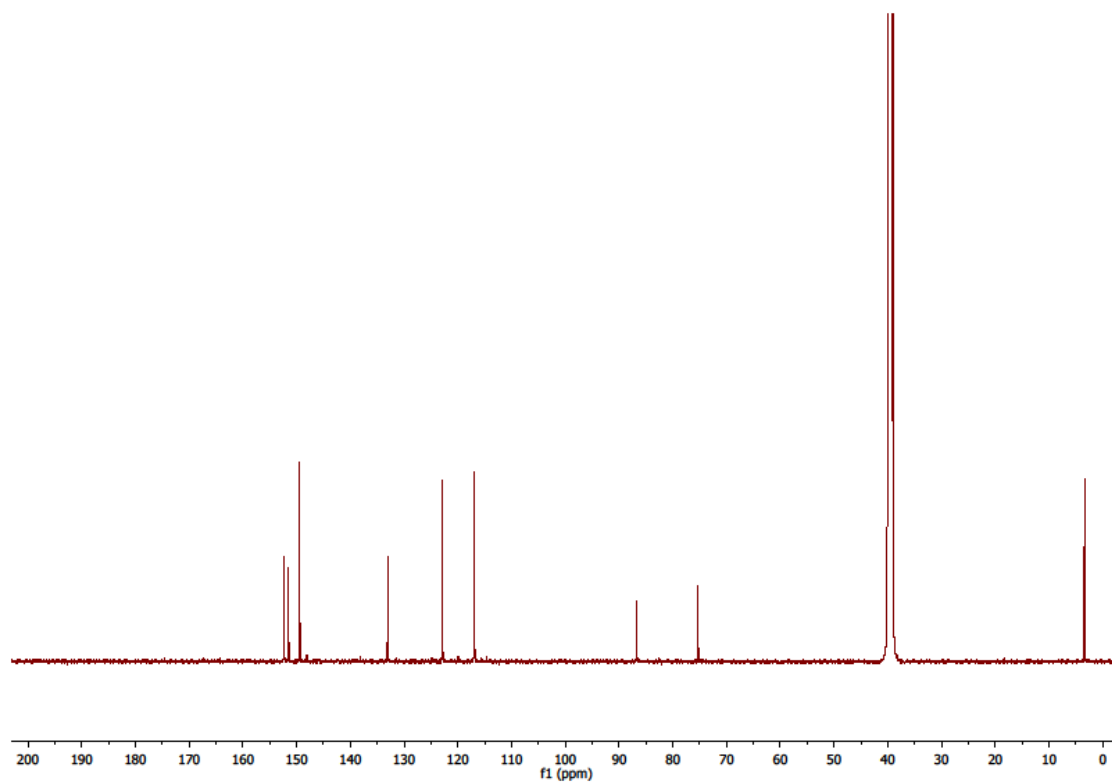

## *N*-(4-cyanopyridin-2-yl)but-2-ynamide (**46**)

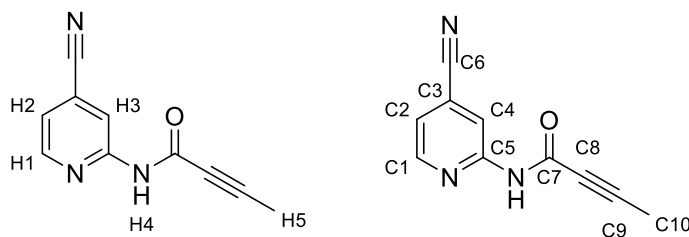

Prepared according to General Method 1 from 2-amino-4-cyanopyridine **30** (0.10 g, 0.84 mmol), LDA (1.76 mmol) and ethyl 2-butynoate **24** (0.12 mL, 1.01 mmol). The crude product was purified by column chromatography (SiO<sub>2</sub>, 20 g, 7:3 40-60 petroleum ether: EtOAc) to yield a yellow solid (0.06 g, 0.30 mmol, 36%). *R<sub>f</sub>* = 0.35 (1:1 40-60 petroleum ether: EtOAc). Mpt (CH<sub>2</sub>Cl<sub>2</sub>): darkens >140 °C, decomp. >297 °C. IR  $\nu_{\text{max}}/\text{cm}^{-1}$  (neat): 3075 (w, br), 2230 (med, C≡C/C≡N), 1676 (str, C=O), 1600 (w, C=C), 1559 (str, C=C), 1521 (med, C=C), 1420 (str, C=C/C=N), 1293 (w), 1262 (str), 1231 (med), 1150 (med), 1067 (med). <sup>1</sup>H NMR (500 MHz, d<sup>6</sup>-DMSO):  $\delta_{\text{H}}$  11.53 (1H, s, H4),  $\delta_{\text{H}}$  8.57 (1H, dd, *J* = 5.0, 0.3 Hz, H1),  $\delta_{\text{H}}$  8.24 (1H, s, H3),  $\delta_{\text{H}}$  7.57 (1H, dd, *J* = 5.0, 1.4 Hz, H2),  $\delta_{\text{H}}$  2.04 (3H, s, H5). <sup>13</sup>C NMR (125 MHz, d<sup>6</sup>-DMSO):  $\delta_{\text{C}}$  152.1 (C7),  $\delta_{\text{C}}$  151.7 (C5),  $\delta_{\text{C}}$  149.9 (C1),  $\delta_{\text{C}}$  121.4 (C2),  $\delta_{\text{C}}$  121.0 (C3),  $\delta_{\text{C}}$  116.9 (C6),  $\delta_{\text{C}}$  116.1 (C4),  $\delta_{\text{C}}$  87.2 (C8),  $\delta_{\text{C}}$  75.2 (C9),  $\delta_{\text{C}}$  3.5 (C10). HRMS (FTMS ESI+) *m/z* found [M+H]<sup>+</sup> 186.0658, C<sub>10</sub>H<sub>8</sub>ON<sub>3</sub><sup>+</sup> required 186.0658,  $\Delta$  ppm = -1.98 ppm.

<sup>1</sup>H NMR

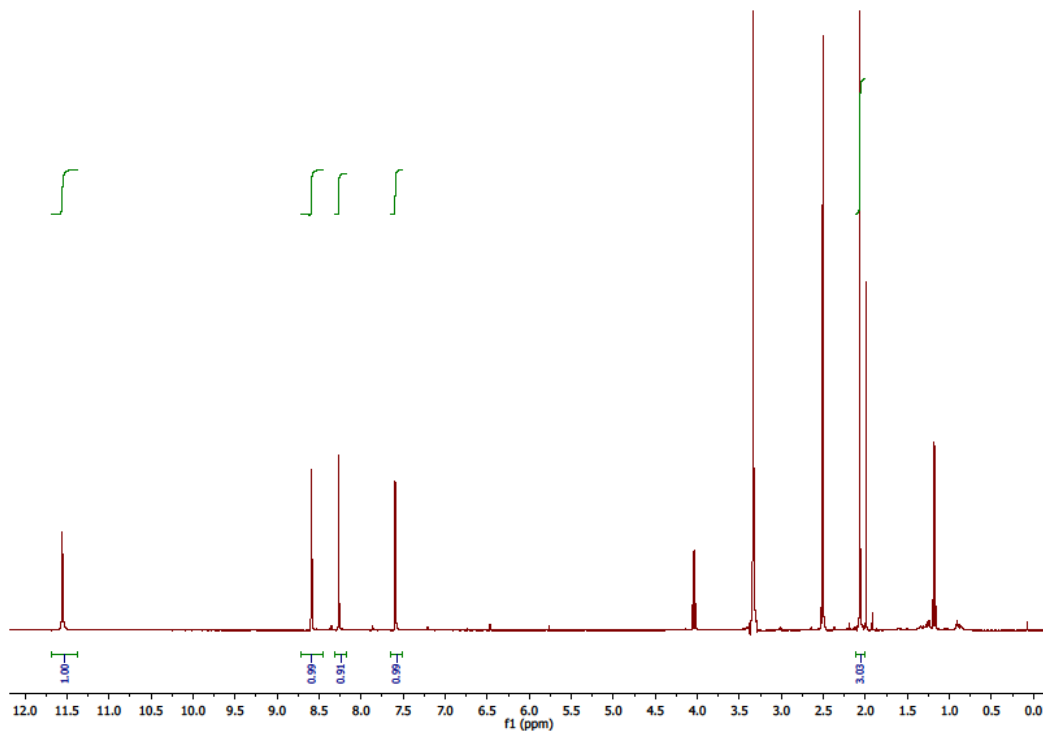

$^{13}\text{C}$  NMR

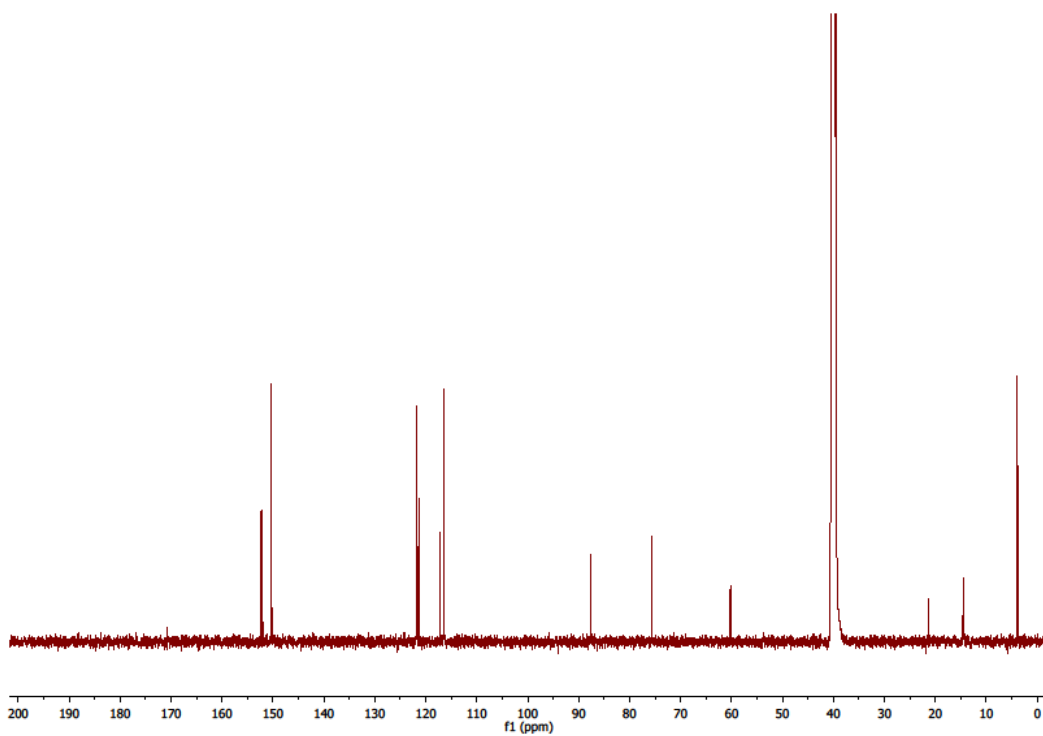



## *N*-(4-chloropyridin-2-yl)but-2-ynamide (**47**)

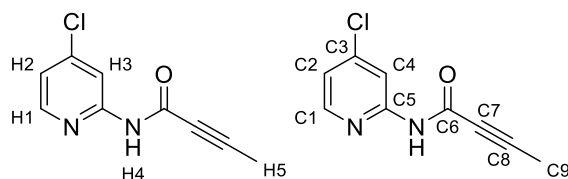

Prepared according to General Method 1 from 2-amino-4-chloropyridine **31** (1.00 g, 7.78 mmol), LDA (16.33 mmol) and ethyl 2-butynoate **24** (1.09 mL, 9.33 mmol). The crude product was purified by Combiflash Companion (SiO<sub>2</sub>, 50 g, 0-100% EtOAc in heptane) to yield a cream solid (0.88 g, 4.52 mmol, 58%). *R<sub>f</sub>* = 0.18 (3:1 heptane:EtOAc). Mpt (CH<sub>2</sub>Cl<sub>2</sub>): decomp 150-165 °C. IR  $\nu_{\text{max}}/\text{cm}^{-1}$  (neat): 2983 (w, br, N-H/C-H), 2326 (w, br, C≡C), 2232 (med, C≡C), 1664 (str, C=O), 1575 (str, C=C), 1522 (str, C=C/C=N), 1406 (str), 1274 (str), 1230 (med), 1098 (med), 1071 (med). <sup>1</sup>H NMR (400 MHz, d<sup>6</sup>-DMSO):  $\delta_{\text{H}}$  11.31 (1H, s, H4),  $\delta_{\text{H}}$  8.32 (1H, d, *J* = 5.4 Hz, H1),  $\delta_{\text{H}}$  8.05 (1H, d, *J* = 2.0 Hz, H3),  $\delta_{\text{H}}$  7.27 (1H, dd, *J* = 5.4, 1.9 Hz, H2),  $\delta_{\text{H}}$  2.04 (3H, s, H5). <sup>13</sup>C NMR (100 MHz, d<sup>6</sup>-DMSO):  $\delta_{\text{C}}$  152.7 (C5),  $\delta_{\text{C}}$  151.6 (C6),  $\delta_{\text{C}}$  149.6 (C1),  $\delta_{\text{C}}$  144.1 (C3),  $\delta_{\text{C}}$  120.0 (C2),  $\delta_{\text{C}}$  114.1 (C4),  $\delta_{\text{C}}$  86.8 (C7),  $\delta_{\text{C}}$  75.4 (C8),  $\delta_{\text{C}}$  3.9 (C9). HRMS (TOF ES+) *m/z* found [M+H]<sup>+</sup> 195.0329, C<sub>9</sub>H<sub>8</sub>N<sub>2</sub>O<sup>35</sup>Cl<sup>+</sup> required 195.0325,  $\Delta$  ppm = 2.1 ppm.

$^1\text{H}$  NMR

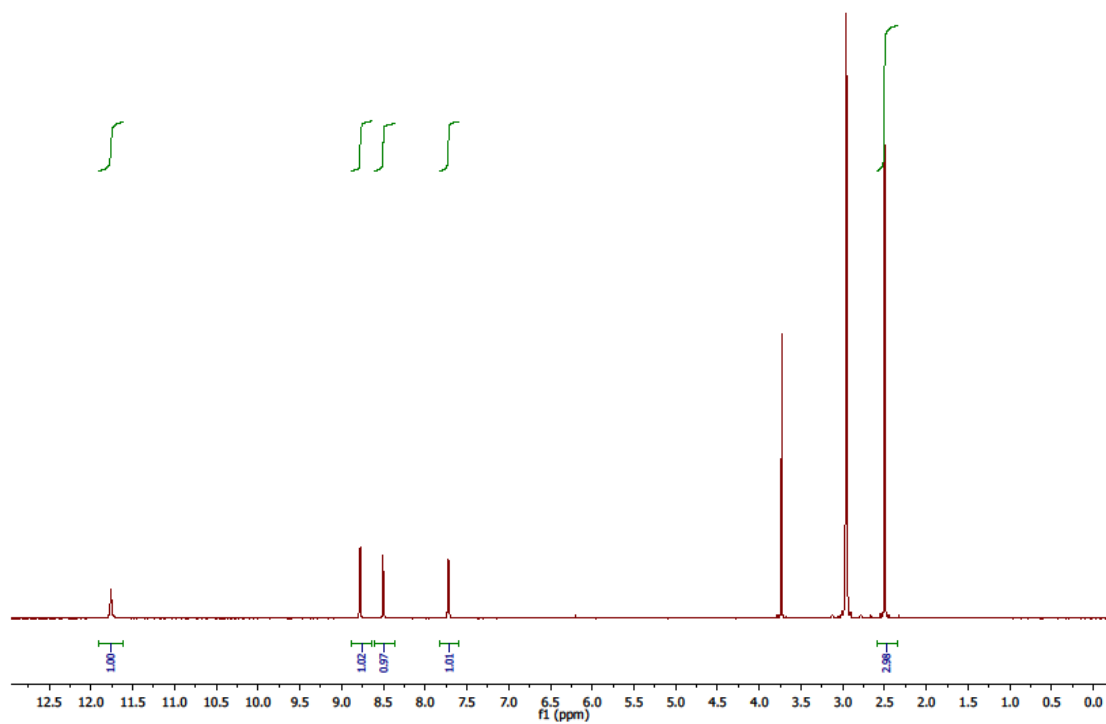

$^{13}\text{C}$  NMR

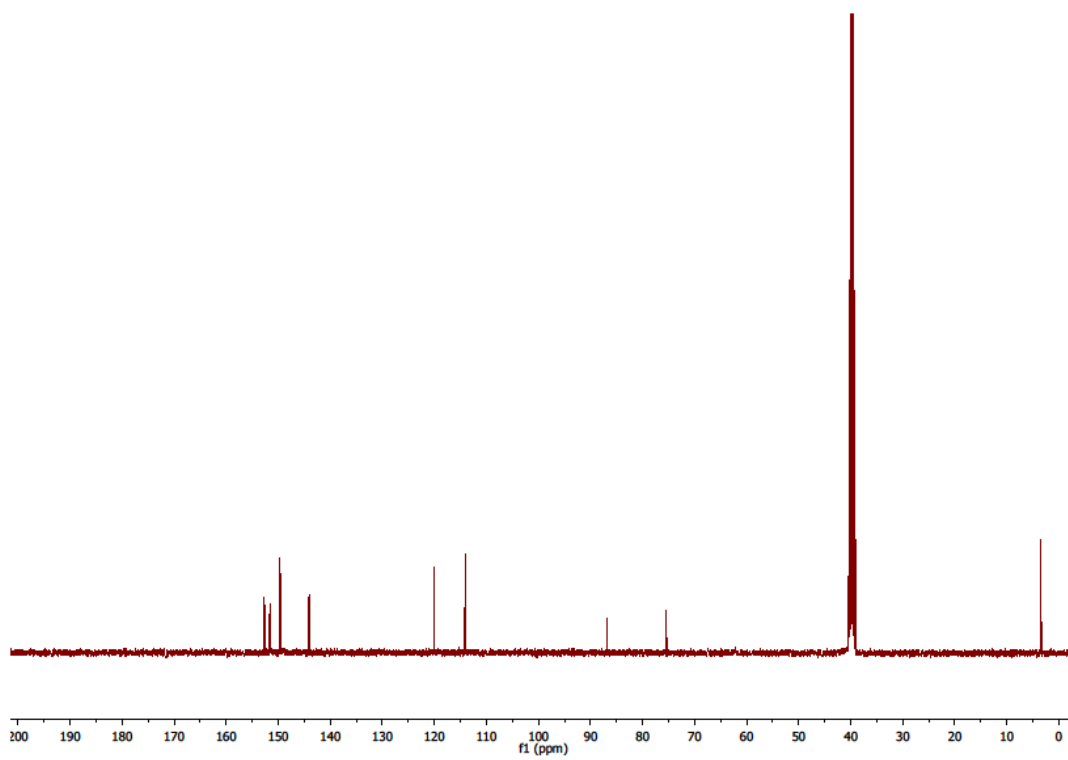

## *N*-(4-methylpyridin-2-yl)but-2-ynamide (**48**)

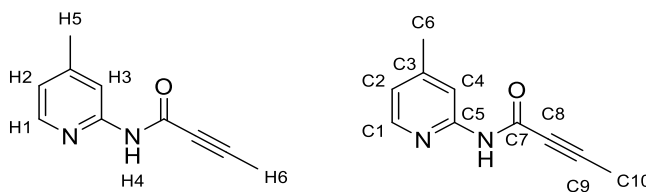

Prepared according to General Method 1 from 2-amino-4-methylpyridine **32** (1.004 g, 9.28 mmol), *n*BuLi (19.50 mmol) and ethyl 2-butynoate **24** (1.299 mL, 11.14 mmol). The crude product was purified by column chromatography (SiO<sub>2</sub>, elution gradient 0 to 30% EtOAc in heptane) to yield a yellow solid. This was triturated with heptane to yield a yellow powder (0.624g, 39%). *R*<sub>f</sub> = 0.35 (1:1 40-60 petroleum ether: EtOAc). Mpt (CH<sub>2</sub>Cl<sub>2</sub>): darkens >120 °C, melts 220-225 °C. IR  $\nu_{\max}/\text{cm}^{-1}$  (neat): 3114 (w, N-H/C-H), 2959 (w, C-H), 2917 (w, C-H), 1662 (str, C=O), 1612 (str, C=C), 1571 (str, C=C), 1533 (str, C=C/C=N), 1470 (med), 1410 (str), 1293 (str), 1284 (med), 1267 (str), 1259 (str), 1236 (str), 1166 (med), 1122 (w), 1074 (w), 1023 (w), 1000 (w). <sup>1</sup>H NMR (500 MHz, d<sup>6</sup>-DMSO):  $\delta_{\text{H}}$  10.93 (1H, s, H4),  $\delta_{\text{H}}$  8.16-8.14 (1H, m, H1),  $\delta_{\text{H}}$  7.79 (1H, s, H3),  $\delta_{\text{H}}$  6.95-6.94 (1H, m, H2),  $\delta_{\text{H}}$  2.28 (3H, s, H5),  $\delta_{\text{H}}$  2.01 (3H, s, H6). <sup>13</sup>C NMR (125 MHz, d<sup>6</sup>-DMSO):  $\delta_{\text{C}}$  151.5 (C7),  $\delta_{\text{C}}$  151.3 (C5),  $\delta_{\text{C}}$  149.0 (C3),  $\delta_{\text{C}}$  147.8 (C1),  $\delta_{\text{C}}$  121.0 (C2),  $\delta_{\text{C}}$  115.0 (C4),  $\delta_{\text{C}}$  85.7 (C8),  $\delta_{\text{C}}$  75.6 (C9),  $\delta_{\text{C}}$  20.9 (C6),  $\delta_{\text{C}}$  3.4 (C10). HRMS (FTMS ESI+) *m/z* found [M+H]<sup>+</sup> 175.0859, C<sub>10</sub>H<sub>11</sub>ON<sub>2</sub><sup>+</sup> required 175.0866,  $\Delta$  ppm = -4.1 ppm.

# $^1\text{H}$ NMR

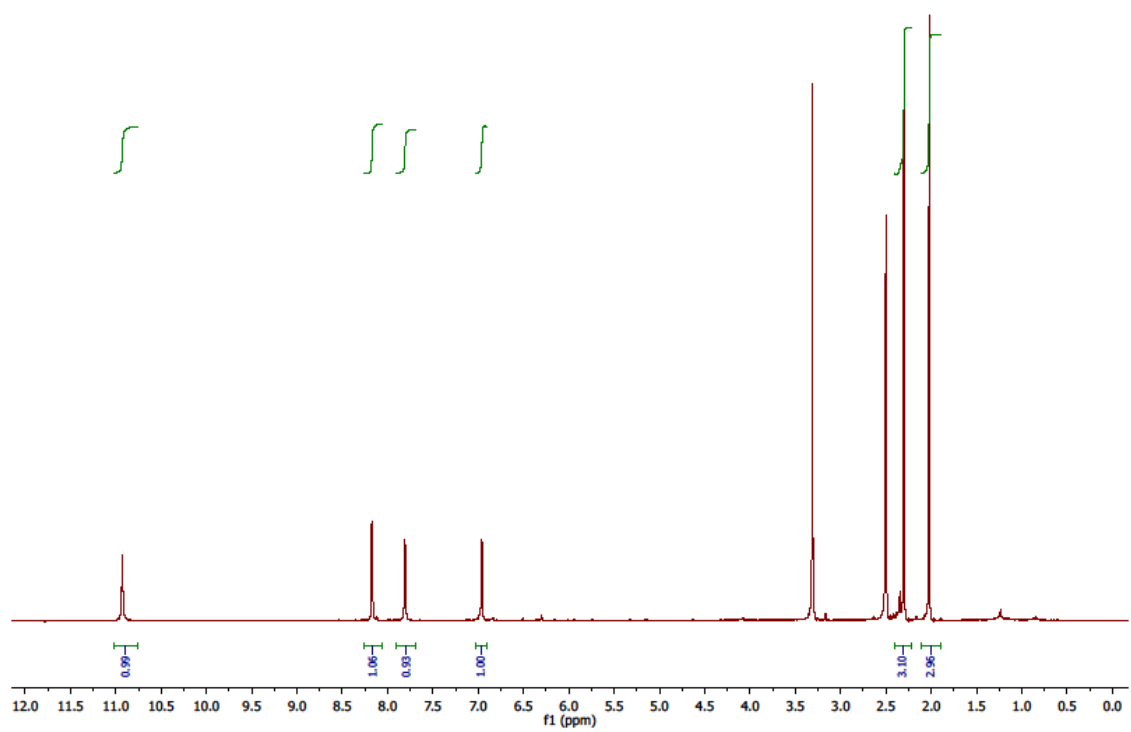

# $^{13}\text{C}$ NMR

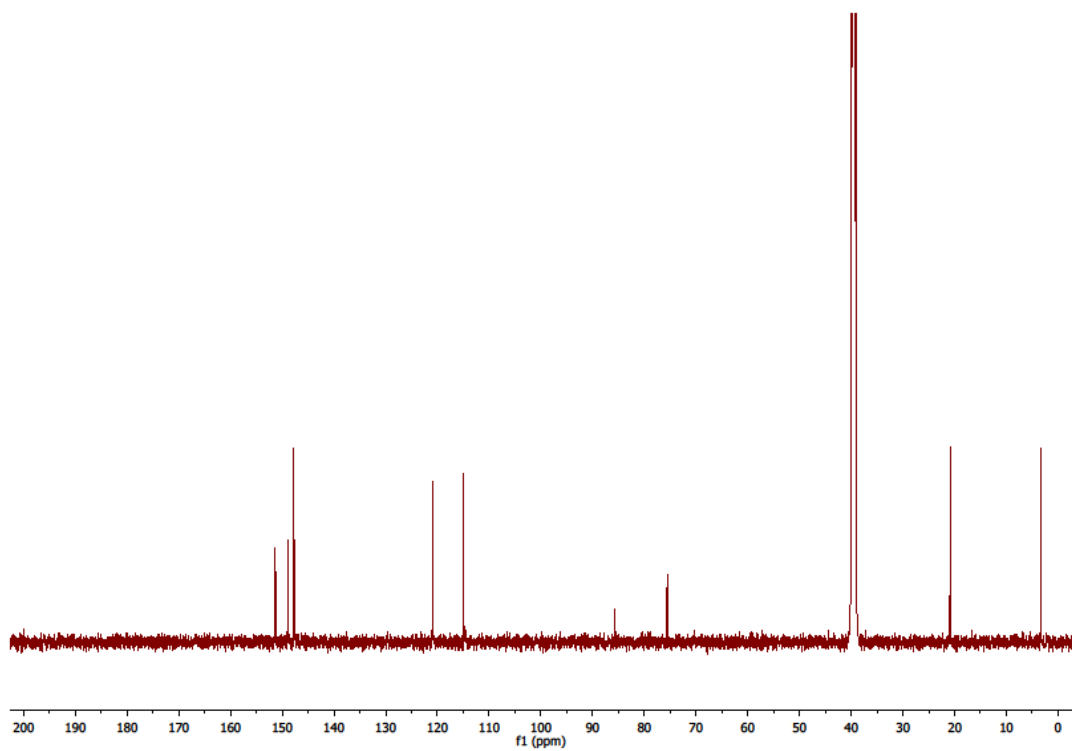

## *N*-(4-phenylpyridin-2-yl)but-2-ynamide (**49**)

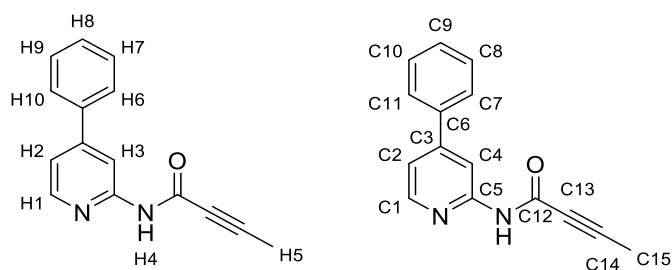

Prepared according to General Method 1 from 2-amino-4-phenylpyridine **33** (0.15 g, 0.88 mmol), <sup>n</sup>BuLi (1.85 mmol) and ethyl 2-butynoate **24** (0.12 mL, 1.06 mmol). The crude product was purified by column chromatography (SiO<sub>2</sub>, 20 g, 3:2 40-60 petroleum ether: EtOAc) to yield a pale yellow solid (0.07 g, 0.28 mmol, 32%). R<sub>f</sub> = 0.57 (1:1 40-60 petroleum ether: EtOAc). Mpt (CH<sub>2</sub>Cl<sub>2</sub>): darkens >142 °C, melts 210-213 °C. IR ν<sub>max</sub>/cm<sup>-1</sup> (neat): 2979 (w, br), 2357 (w, C≡C), 2343 (w, C≡C), 2229 (w, C≡C), 1663 (str, C=O), 1605 (med, C=C), 1557 (str, C=C), 1530 (med), 1493 (w), 1463 (w), 1448 (w), 1408 (str), 1318 (w), 1282 (w), 1264 (str), 1230 (med), 1074 (med). <sup>1</sup>H NMR (500 MHz, d<sup>6</sup>-DMSO): δ<sub>H</sub> 11.16 (1H, s, H4), δ<sub>H</sub> 8.39 (1H, app dd, *J* = 5.2, 0.6 Hz, H1), δ<sub>H</sub> 8.28-8.26 (1H, m, H3), δ<sub>H</sub> 7.74-7.71 (2H, m, H6+H10), δ<sub>H</sub> 7.57-7.47 (3H, m, H7+H8+H9), δ<sub>H</sub> 7.45 (1H, dd, *J* = 5.2, 0.6 Hz, H2), δ<sub>H</sub> 2.03 (3H, s, H5). <sup>13</sup>C NMR (125 MHz, d<sup>6</sup>-DMSO): δ<sub>C</sub> 167.5 (C12), δ<sub>C</sub> 152.4 (C5), δ<sub>C</sub> 149.4 (C3), δ<sub>C</sub> 148.8 (C1), δ<sub>C</sub> 137.5 (C6), δ<sub>C</sub> 129.4 (C8+C10), δ<sub>C</sub> 127.1 (C9), δ<sub>C</sub> 126.9 (C7+C11), δ<sub>C</sub> 117.8 (C2), δ<sub>C</sub> 111.9 (C4), δ<sub>C</sub> 86.0 (C13), δ<sub>C</sub> 75.6 (C14), δ<sub>C</sub> 3.5 (C15). HRMS (TOF ES+) *m/z* found [M+H]<sup>+</sup> 237.1026, C<sub>15</sub>H<sub>13</sub>ON<sub>2</sub><sup>+</sup> required 237.1028, Δ ppm = -0.8 ppm.

$^1\text{H}$  NMR

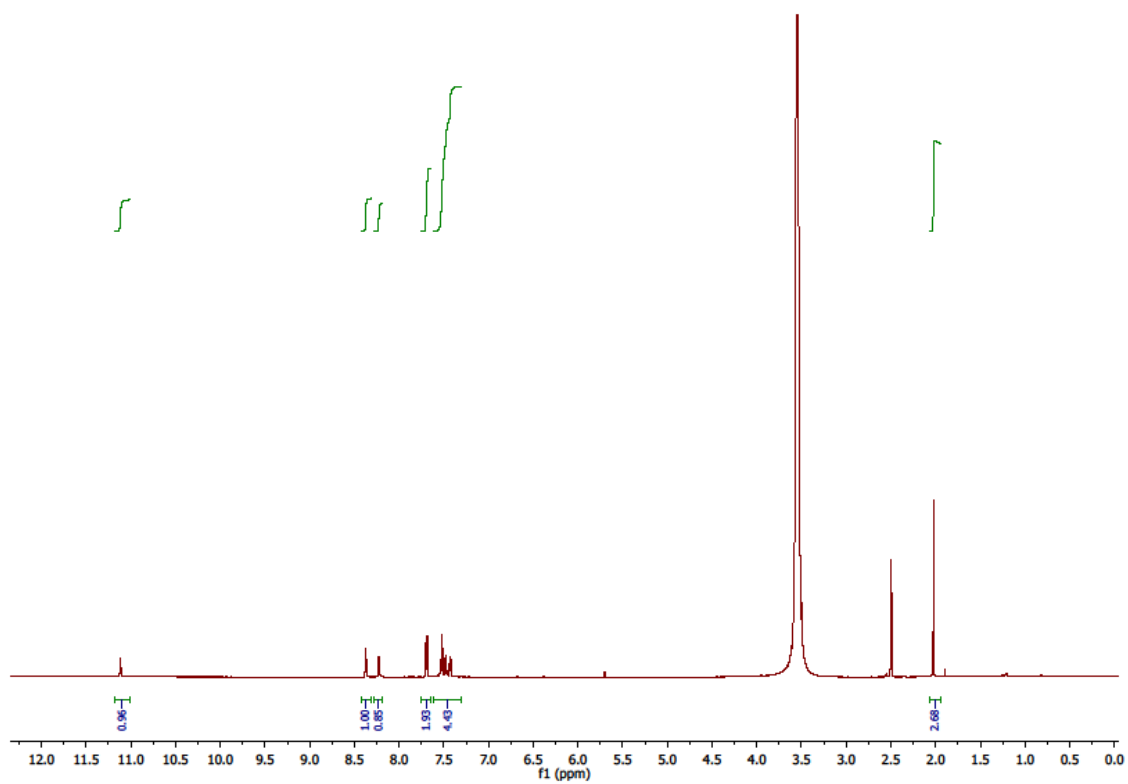

$^{13}\text{C}$  NMR

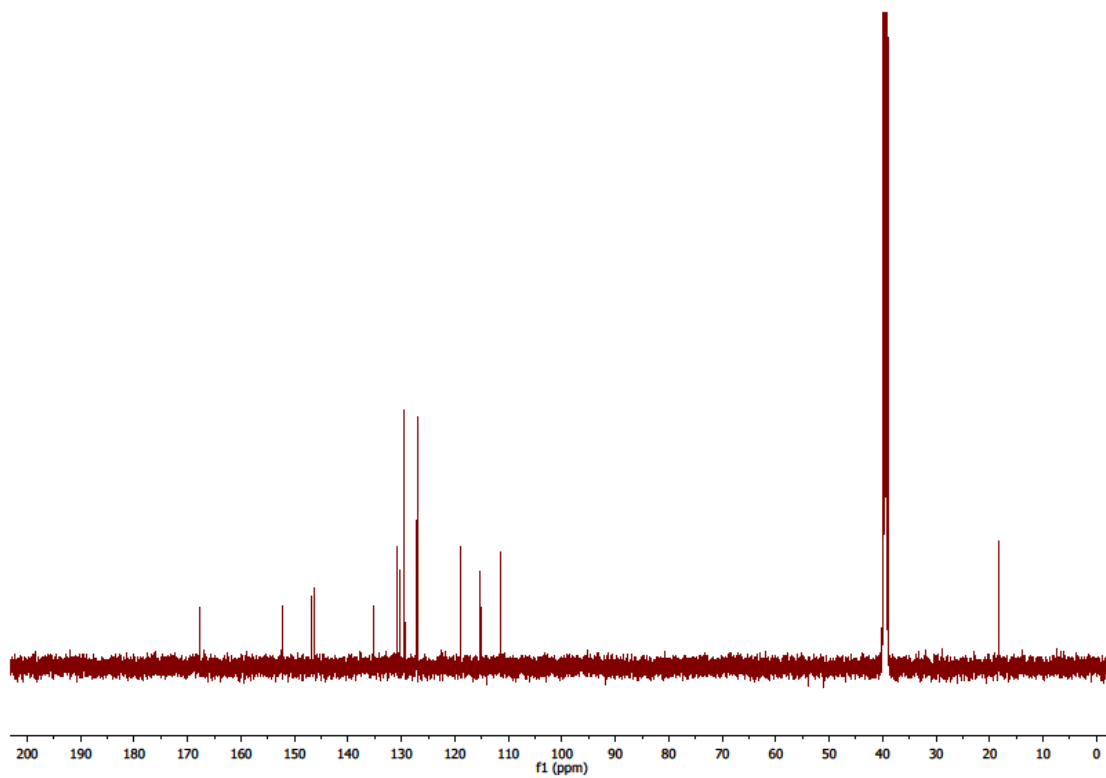

## Ethyl 2-(but-2-ynamido)isonicotinate (**50**)

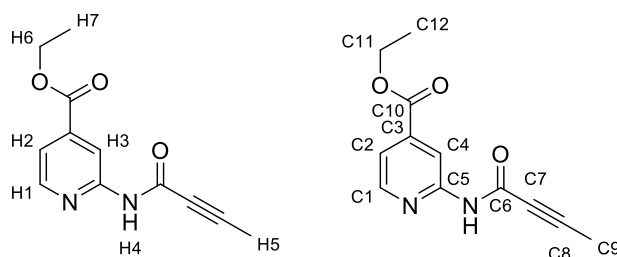

Prepared according to General Method 1 from 2-amino-isonicotinic acid ethyl ester **34** (0.10 g, 0.60 mmol), LDA (1.26 mmol) and ethyl 2-butynoate **24** (0.08 mL, 0.72 mmol). The crude product was purified by column chromatography (SiO<sub>2</sub>, 20 g, 3:2 40-60 petroleum ether: EtOAc) to yield a yellow solid (0.04 g, 0.18 mmol, 30%). R<sub>f</sub> = 0.44 (1:1 40-60 petroleum ether: EtOAc). Mpt (CH<sub>2</sub>Cl<sub>2</sub>): phase change >117 °C, melts 124-125 °C. IR ν<sub>max</sub>/cm<sup>-1</sup> (neat): 3161 (w, N-H), 3127 (w, C-H/N-H), 2980 (w, C-H), 2357 (w, C≡C), 1722 (str, C=O), 1665 (str, C=O), 1608 (w), 1572 (str, C=C), 1530 (str, C=C), 1461 (w), 1407 (str), 1369 (w), 1303 (w), 1287 (str), 1270 (str, C-O), 1232 (str), 1215 (str), 1173 (w), 1121 (w), 1104 (med), 1071 (med), 1016 (med). <sup>1</sup>H NMR (500 MHz, d<sup>6</sup>-DMSO): δ<sub>H</sub> 11.36 (1H, s, H4), δ<sub>H</sub> 8.53 (1H, app dd, *J* = 5.1, 0.8 Hz, H1), δ<sub>H</sub> 8.47 (1H, app s, H3), δ<sub>H</sub> 7.56 (1H, dd, *J* = 5.1, 1.5 Hz, H2), δ<sub>H</sub> 4.36 (2H, q, *J* = 7.1 Hz, H6), δ<sub>H</sub> 2.05 (3H, s, H5), δ<sub>H</sub> 1.33 (3H, t, *J* = 7.1 Hz, H7). <sup>13</sup>C NMR (125 MHz, d<sup>6</sup>-DMSO): δ<sub>C</sub> 164.5 (C10), δ<sub>C</sub> 152.5 (C5), δ<sub>C</sub> 151.5 (C6), δ<sub>C</sub> 149.3 (C1), δ<sub>C</sub> 139.2 (C3), δ<sub>C</sub> 118.7 (C2), δ<sub>C</sub> 113.4 (C4), 86.5 (C7), δ<sub>C</sub> 75.4 (C8), δ<sub>C</sub> 61.7 (C11), δ<sub>C</sub> 14.1 (C12), δ<sub>C</sub> 3.5 (C9). HRMS (TOF ES<sup>+</sup>) *m/z* found [M+H]<sup>+</sup> 233.0936, C<sub>12</sub>H<sub>13</sub>O<sub>3</sub>N<sub>2</sub><sup>+</sup> required 233.0926, Δ ppm = 4.3 ppm.

$^1\text{H}$  NMR

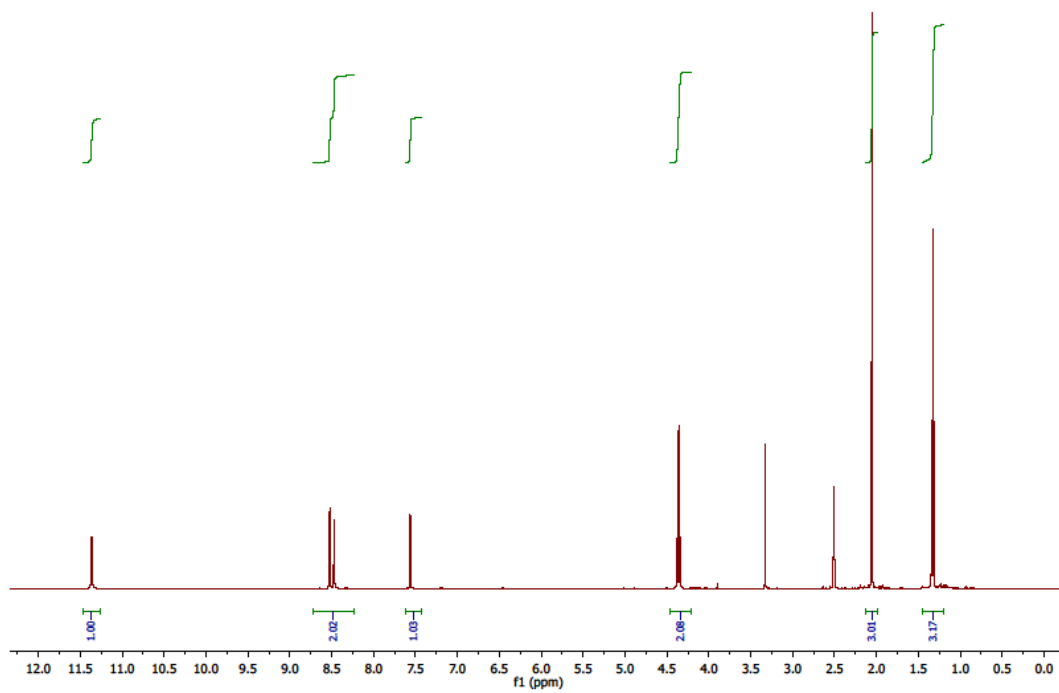

$^{13}\text{C}$  NMR

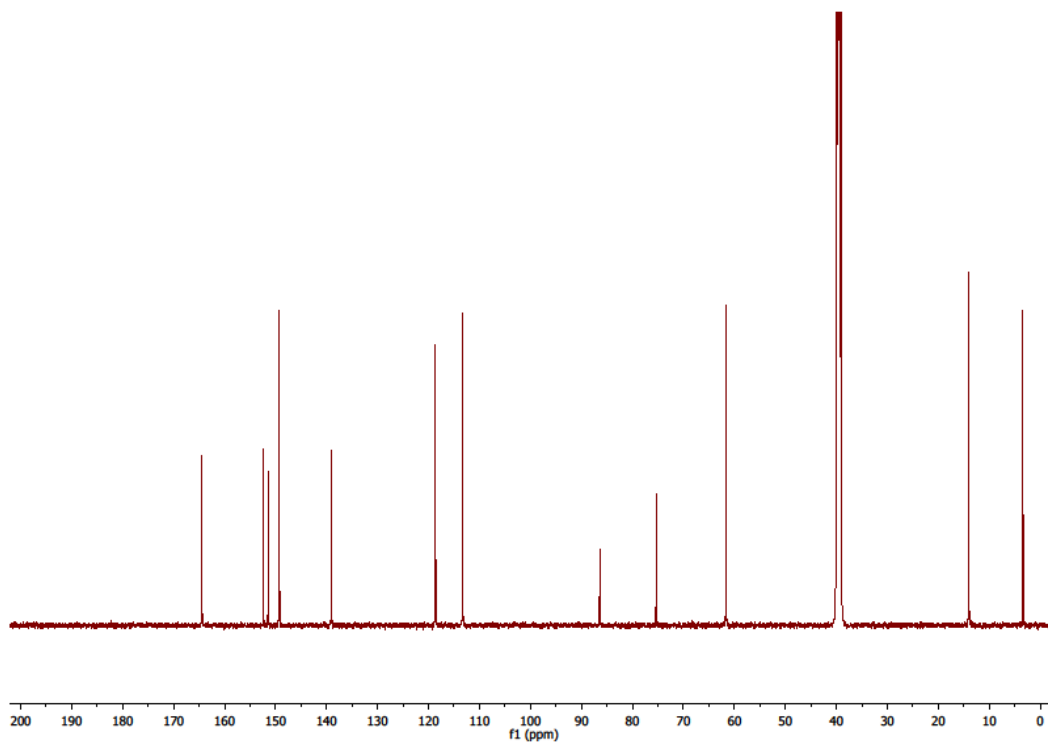



## *N*-(4-Methoxypyridin-2-yl)but-2-ynamide (**51**)

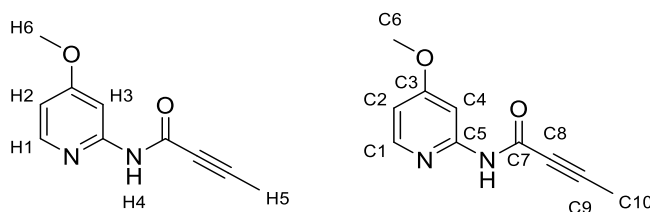

Prepared according to General Method 1 from 2-amino-4-methoxypyridine **35** (0.30 g, 2.42 mmol), <sup>n</sup>BuLi (5.07 mmol) and ethyl 2-butynoate **24** (0.34 mL, 2.90 mmol). The crude product was purified by column chromatography (SiO<sub>2</sub>, 20 g, 3:2 then 1:1 40-60 petroleum ether: EtOAc) to yield a beige solid (0.15 g, 0.81 mmol, 34%). R<sub>f</sub> = 0.28 (1:1 40-60 petroleum ether: EtOAc). Mpt (CH<sub>2</sub>Cl<sub>2</sub>): darkens >140 °C, melts 149-150 °C. IR ν<sub>max</sub>/cm<sup>-1</sup> (neat): 3117 (w, N-H/C-H), 2980 (w, C-H), 2230 (w, C≡C), 1655 (str, C=O), 1577 (str, C=C), 1533 (str, C=C), 1472 (w), 1452 (med), 1426 (med), 1311 (med), 1297 (w), 1279 (str), 1250 (str), 1196 (str), 1164 (str), 1133 (w), 1046 (str). <sup>1</sup>H NMR (500 MHz, d<sup>6</sup>-DMSO): δ<sub>H</sub> 10.99 (1H, s, H4), δ<sub>H</sub> 8.12 (1H, d, *J* = 5.8 Hz, H1), δ<sub>H</sub> 7.56 (1H, app s, H3), δ<sub>H</sub> 6.72 (1H, dd, *J* = 5.8, 2.4 Hz, H2), δ<sub>H</sub> 3.78 (3H, s, H6), δ<sub>H</sub> 2.01 (3H, s, H5). <sup>13</sup>C NMR (125 MHz, d<sup>6</sup>-DMSO): δ<sub>C</sub> 167.1 (C3), δ<sub>C</sub> 153.4 (C5), δ<sub>C</sub> 151.8 (C7), δ<sub>C</sub> 149.6 (C1), δ<sub>C</sub> 107.2 (C2), δ<sub>C</sub> 100.4 (C4), δ<sub>C</sub> 86.2 (C8), δ<sub>C</sub> 76.0 (C9), δ<sub>C</sub> 55.8 (C6), δ<sub>C</sub> 3.8 (C10). HRMS (FTMS ESI+) *m/z* found [M+H]<sup>+</sup> 191.0824, C<sub>10</sub>H<sub>11</sub>O<sub>2</sub>N<sub>2</sub><sup>+</sup> required 191.0815, Δ ppm = 4.8 ppm.

$^1\text{H}$  NMR

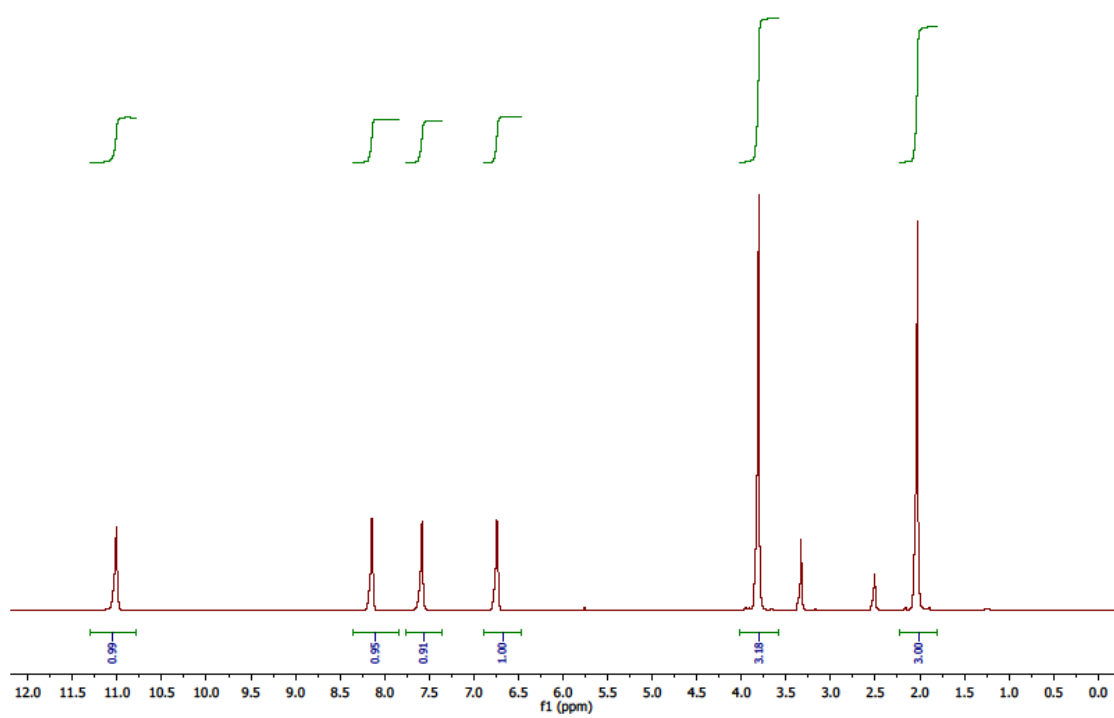

$^{13}\text{C}$  NMR

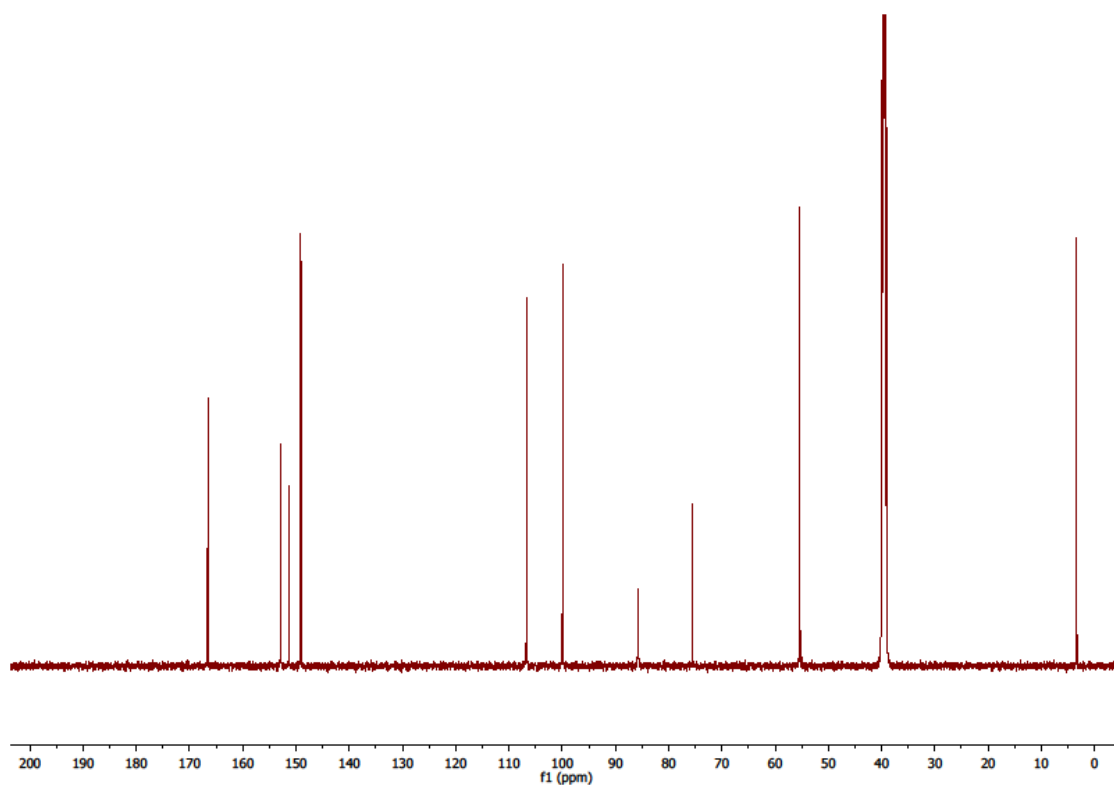

## *N*-(6-Methoxypyridazin-3-yl)but-2-ynamide (**52**)

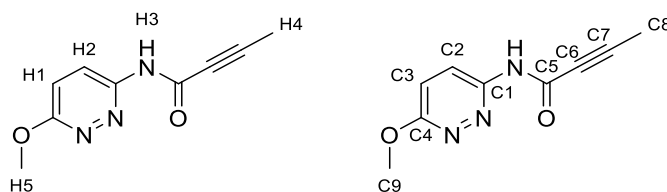

Prepared according to General Method 1 from 6-methoxypyridazin-3-amine **36** (150 mg, 1.20 mmol), *n*BuLi (2.52 mmol) and ethyl 2-butynoate **24** (0.168 mL, 1.44 mmol). Note – solvent should be evaporated at ambient temperature to avoid cyclisation. The crude product was purified by column chromatography (SiO<sub>2</sub>, elution gradient 0 to 50% EtOAc in heptane) to yield an off-white solid (150 mg, 60%). *R<sub>f</sub>* = 0.23 (1:1 EtOAc: heptane). Mpt (CH<sub>2</sub>Cl<sub>2</sub>): decomp. >110 °C. IR *v*<sub>max</sub>/cm<sup>-1</sup> (neat): 3038 (m), 2942 (w, C-H), 2238 (w, C≡C), 1645 (str, C=O), 1603 (w), 1562 (w), 1504 (str), 1457 (med), 1408 (w), 1392 (str), 1340 (w), 1321 (w), 1305 (str), 1269 (med), 1251 (med), 1227 (med), 1210 (str), 1139 (w), 1112 (w), 1071 (w), 1051 (w), 1006 (str). <sup>1</sup>H NMR (400 MHz, d<sup>6</sup>-DMSO): δ<sub>H</sub> 11.41 (1H, s, H3), δ<sub>H</sub> 8.07 (1H, d, *J* = 9.5 Hz, H2), δ<sub>H</sub> 7.22 (1H, d, *J* = 9.5 Hz, H1), δ<sub>H</sub> 3.98 (3H, s, H5), δ<sub>H</sub> 2.03 (3H, s, H4). <sup>13</sup>C NMR (100 MHz, d<sup>6</sup>-DMSO): δ<sub>C</sub> 167.3, 151.4, 150.1, 135.2, 123.7, 118.6, 113.6, 54.9, 54.3, 17.4, 3.3. HRMS (TOF ES+) *m/z* found [M+H]<sup>+</sup> 192.0776, C<sub>9</sub>H<sub>10</sub>N<sub>3</sub>O<sub>2</sub><sup>+</sup> required 192.0773, Δ ppm = 1.6 ppm.

```

NAME          151009
EXPNO         120
PROCNO        1
Date_         20151009
Time_         11.20
INSTRUM       AV400_14S1A
PROBHD        5 mm QNP 1H/13
PULPROG       zg30
TD            65536
SOLVENT       DMSO
NS            32
DS            0
SWH           8278.146 Hz
FIDRES        0.126314 Hz
AQ            3.9584243 sec
RG            1024
DW            60.400 usec
DE            6.00 usec
TE            303.1 K
D1            3.00000000 sec
TD0           1
  
```

```

===== CHANNEL f1 =====
NUC1          1H
P1            11.00 usec
PL1           -2.00 dB
SFO1         400.1324710 MHz
SI            32768
SF            400.1300000 MHz
WDW           EM
SSB           0
LB            0.30 Hz
GB            0
PC            1.00
  
```

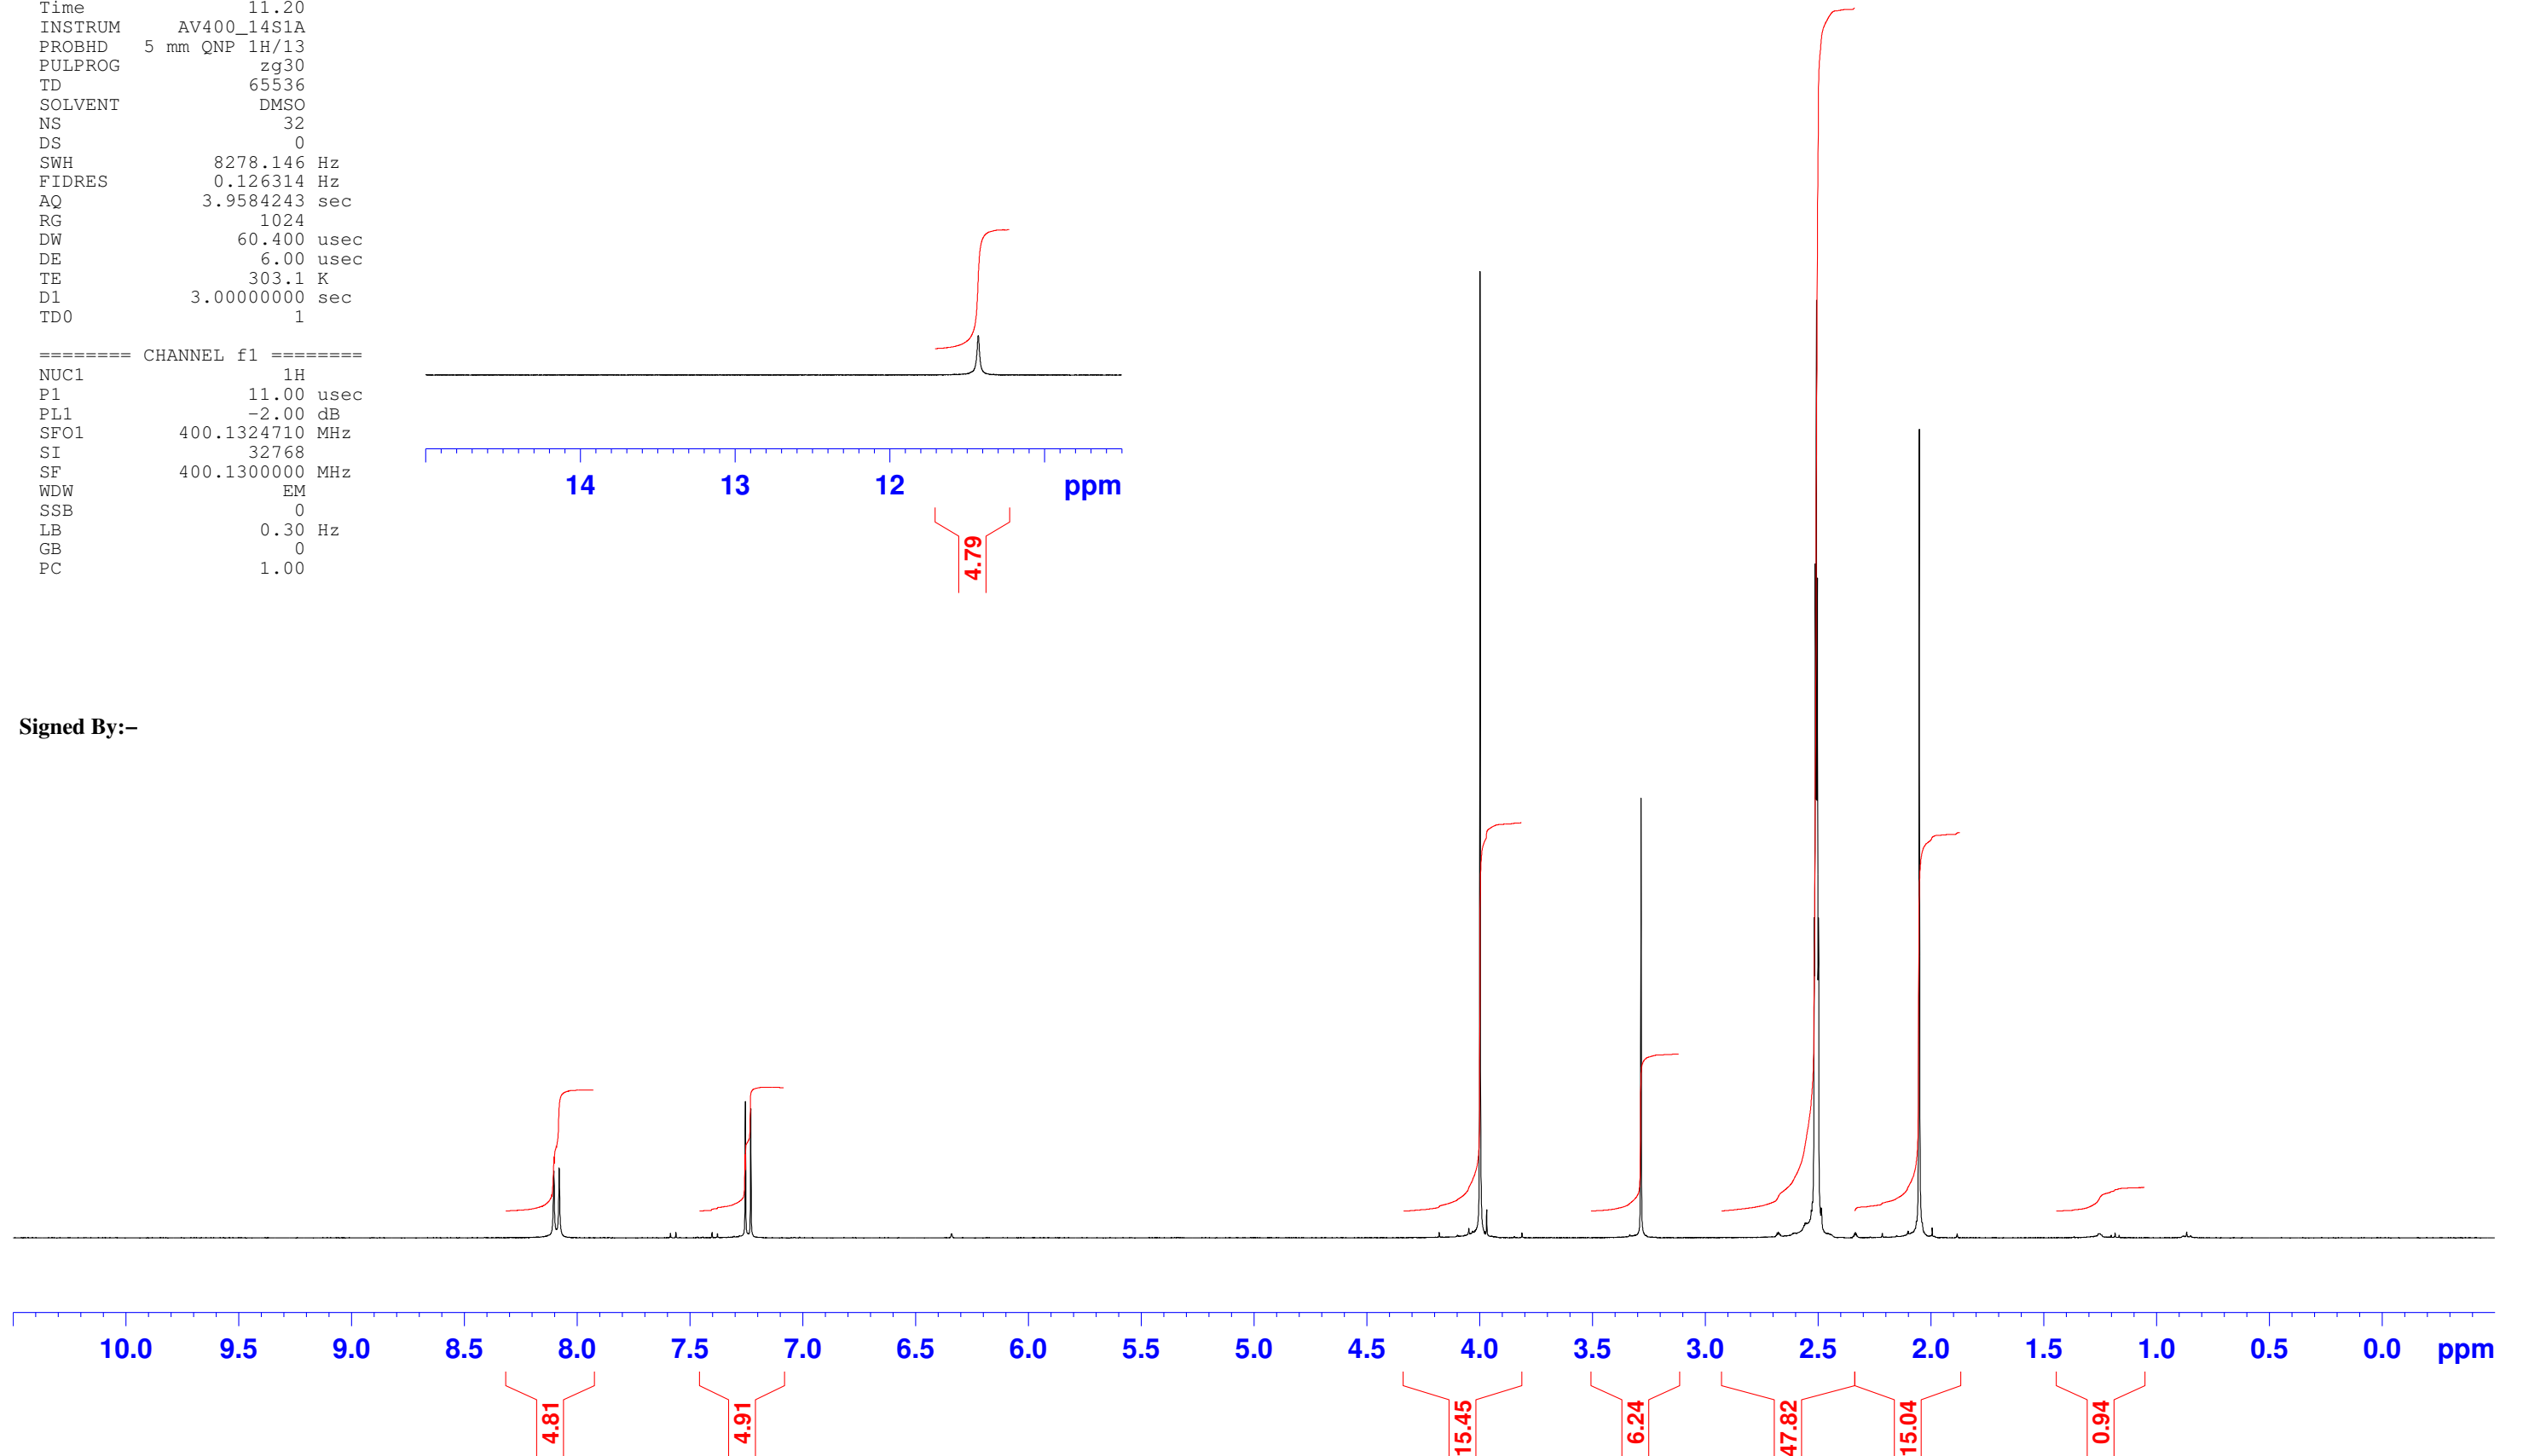

Signed By:--

Name thomas alanine  
M No kgbw666  
Notebook Ref en07919-63-1  
carbon.az DMSO /opt/topspin2.1 chem 12

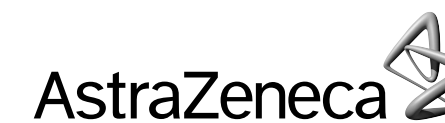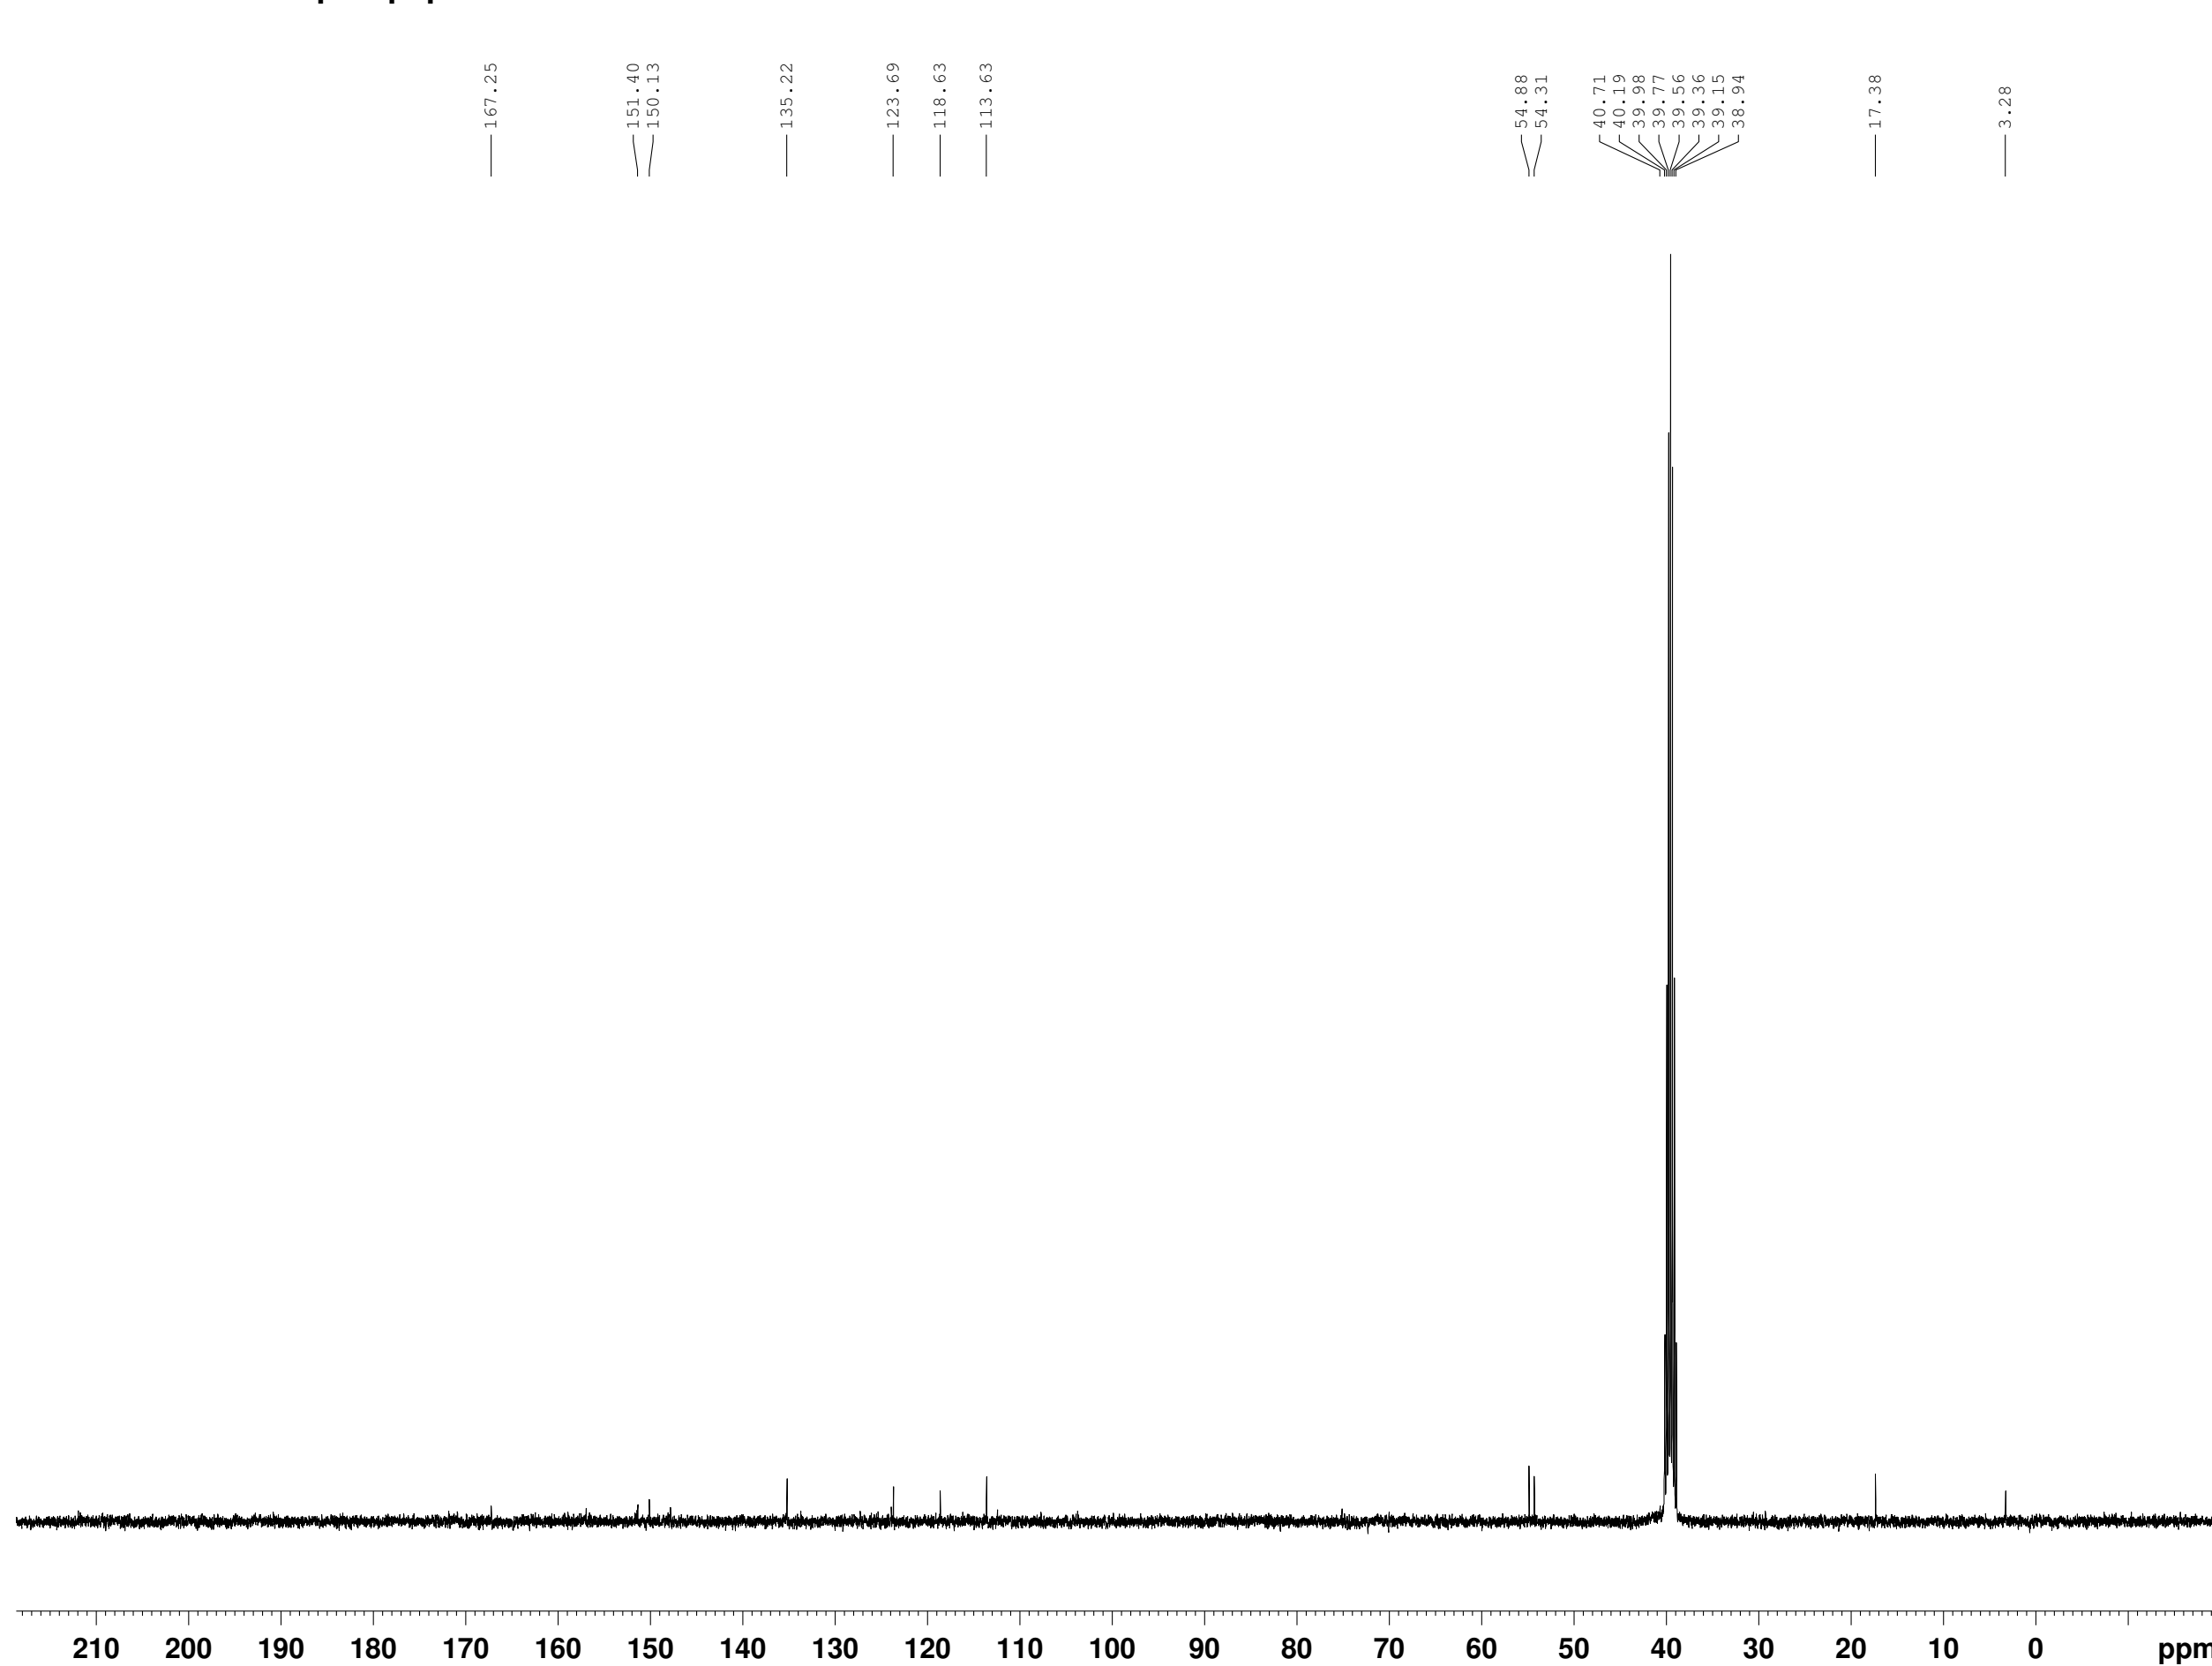

```
NAME          151009
EXPNO         121
PROCNO        1
Date_         20151009
Time          20.41
INSTRUM       AV400_14S1A
PROBHD        5 mm QNP 1H/13
PULPROG       zgpg30
TD            65536
SOLVENT       DMSO
NS            800
DS            4
SWH           23980.814 Hz
FIDRES        0.365918 Hz
AQ            1.3664756 sec
RG            23170.5
DW            20.850 use
DE            20.00 use
TE            303.1 K
D1            2.00000000 sec
D11           0.03000000 sec
TD0           1
```

```
===== CHANNEL f1 =====
NUC1          13C
P1            11.00 use
PL1           3.70 dB
SFO1          100.6228298 MHz
```

```
===== CHANNEL f2 =====
CPDPRG2       waltz16
NUC2          1H
PCPD2         95.00 use
PL2           -2.00 dB
PL12          15.00 dB
PL13          16.00 dB
SFO2          400.1316005 MHz
SI            32768
SF            100.6128193 MHz
WDW           EM
SSB           0
LB            1.00 Hz
GB            0
PC            1.40
```

## *N*-(Pyrazin-2-yl)but-2-ynamide (**53**)

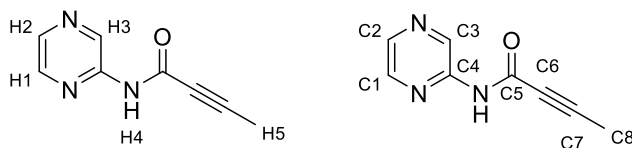

Prepared according to General Method 1 from aminopyrazine **37** (0.10 g, 1.05 mmol), <sup>n</sup>BuLi (2.21 mmol) and ethyl 2-butynoate **24** (0.15 mL, 1.26 mmol). The crude product was purified by Combiflash Companion (SiO<sub>2</sub>, 12 g, 0-50% EtOAc in heptane) to yield a white solid (0.13 g, 0.79 mmol, 75%). R<sub>f</sub> = 0.27 (1:1 heptane: EtOAc). Mpt (H<sub>2</sub>O/MeCN): decomp. >150 °C. IR ν<sub>max</sub>/cm<sup>-1</sup> (neat): 3210 (med, br, N-H/C-H), 2238 (med, C≡C), 1667 (str, C=O), 1594 (w), 1551 (w), 1528 (w), 1488 (med, C=N), 1417 (str), 1344 (med), 1296 (w), 1257 (med), 1199 (med), 1143 (w), 1120 (med), 1077 (w), 1049 (w), 1013 (w). <sup>1</sup>H NMR (400 MHz, d<sup>6</sup>-DMSO): δ<sub>H</sub> 11.35 (1H, s, H4), δ<sub>H</sub> 9.19 (1H, s, H3), δ<sub>H</sub> 8.41 (1H, s, H1 or H2), δ<sub>H</sub> 8.38 (1H, s, H1 or H2), δ<sub>H</sub> 2.06 (3H, s, H5). <sup>13</sup>C NMR (100 MHz, d<sup>6</sup>-DMSO): δ<sub>C</sub> 151.2 (C4 or C5), δ<sub>C</sub> 147.8 (C4 or C5), δ<sub>C</sub> 142.6 (C1 or C2), δ<sub>C</sub> 140.1 (C1 or C2), δ<sub>C</sub> 137.0 (C3), δ<sub>C</sub> 87.0 (C6), δ<sub>C</sub> 75.0 (C7), δ<sub>C</sub> 3.3 (C8). HRMS (TOF ES+) *m/z* found [M+H]<sup>+</sup> 162.0672, C<sub>8</sub>H<sub>8</sub>N<sub>3</sub>O<sup>+</sup> required 162.0667, Δ ppm = 3.1 ppm.

$^1\text{H}$  NMR

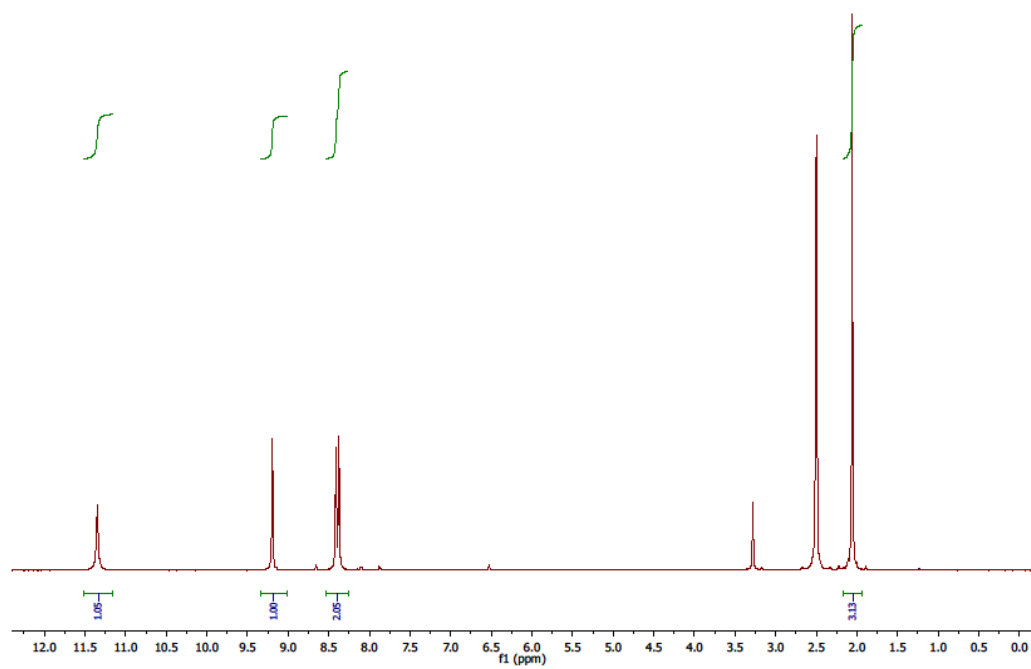

$^{13}\text{C}$  NMR

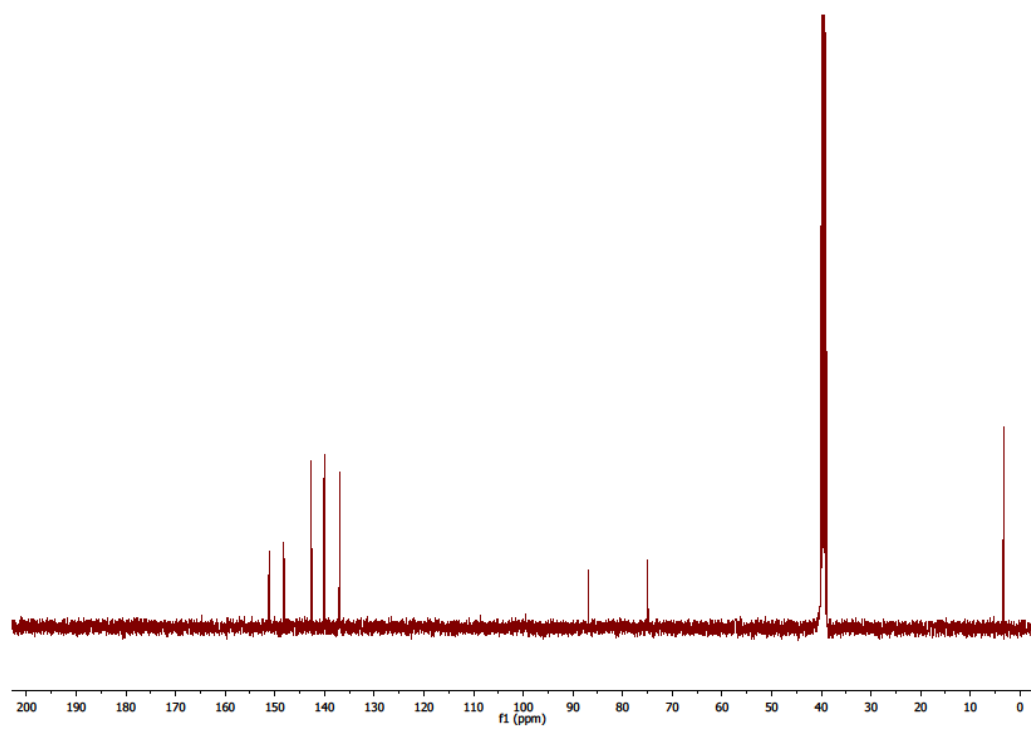

## *N*-(6-Chloropyrazin-2-yl)but-2-ynamide (**54**)

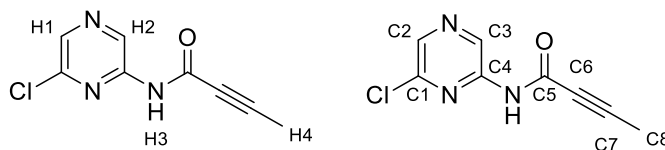

Prepared according to General Method 1 from 2-amino-6-chloropyrazine **38** (0.19 g, 1.43 mmol), LDA (3.00 mmol) and ethyl 2-butynoate **24** (0.20 mL, 1.72 mmol). The crude product was purified by Combiflash Companion (SiO<sub>2</sub>, 12 g, 0-50% EtOAc in heptane) to yield orange flakes (0.12 g, 0.59 mmol, 41%). *R<sub>f</sub>* = 0.71 (1:1 heptane: EtOAc). Mpt (H<sub>2</sub>O/MeCN): phase change >150 °C, then melted 185-187 °C. IR  $\nu_{\text{max}}/\text{cm}^{-1}$  (neat): 3207 (med, N-H), 2968 (med, C-H), 2236 (med, C≡C), 1668 (str, C=O), 1582 (w), 1556 (w), 1527 (w), 1486 (w), 1416 (str), 1398 (str), 1344 (med), 1297 (w), 1258 (med), 1198 (med), 1145 (w), 1120 (med), 1077 (w), 1047 (w), 1003 (w). <sup>1</sup>H NMR (400 MHz, d<sup>6</sup>-DMSO):  $\delta_{\text{H}}$  11.63 (1H, s, H3),  $\delta_{\text{H}}$  9.17 (1H, s, H2),  $\delta_{\text{H}}$  8.49 (1H, s, H1),  $\delta_{\text{H}}$  2.06 (3H, s, H4). <sup>13</sup>C NMR (100 MHz, d<sup>6</sup>-DMSO):  $\delta_{\text{C}}$  151.1 (C4 or C5),  $\delta_{\text{C}}$  147.5 (C4 or C5),  $\delta_{\text{C}}$  145.4 (C1),  $\delta_{\text{C}}$  138.6 (C3),  $\delta_{\text{C}}$  134.7 (C2),  $\delta_{\text{C}}$  87.7 (C6),  $\delta_{\text{C}}$  74.8 (C7),  $\delta_{\text{C}}$  3.3 (C8). HRMS (TOF ES+) *m/z* found [M+H]<sup>+</sup> 196.0279, C<sub>8</sub>H<sub>7</sub>N<sub>3</sub>O<sup>35</sup>Cl<sup>+</sup> required 196.0278,  $\Delta$  ppm = 0.5 ppm.



$^1\text{H}$  NMR

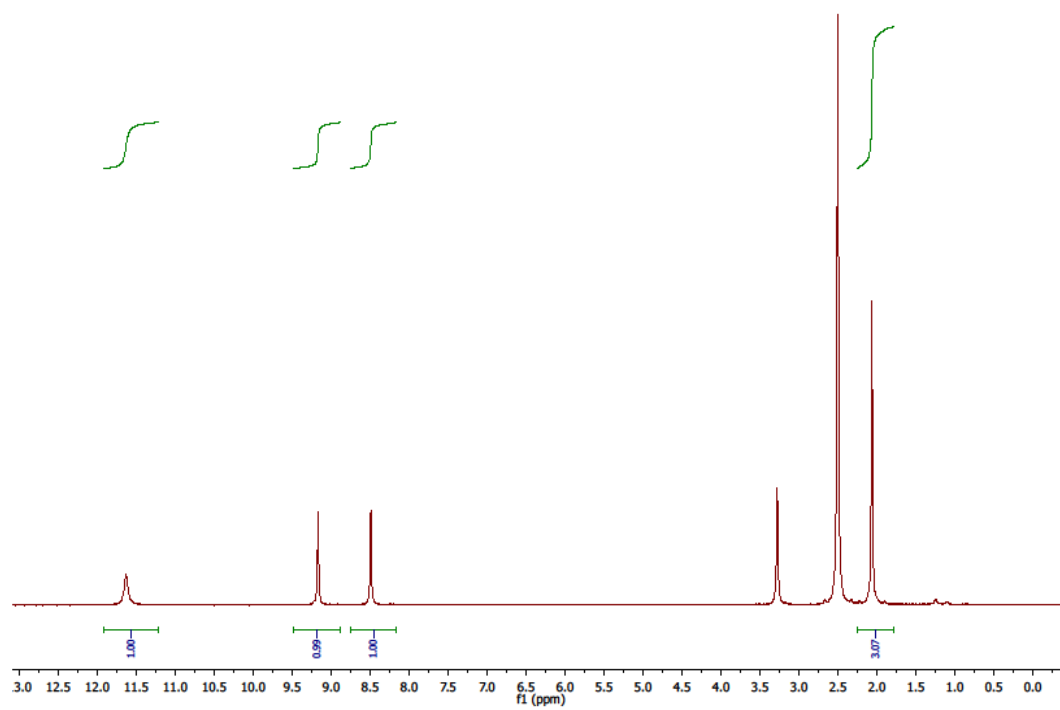

$^{13}\text{C}$  NMR

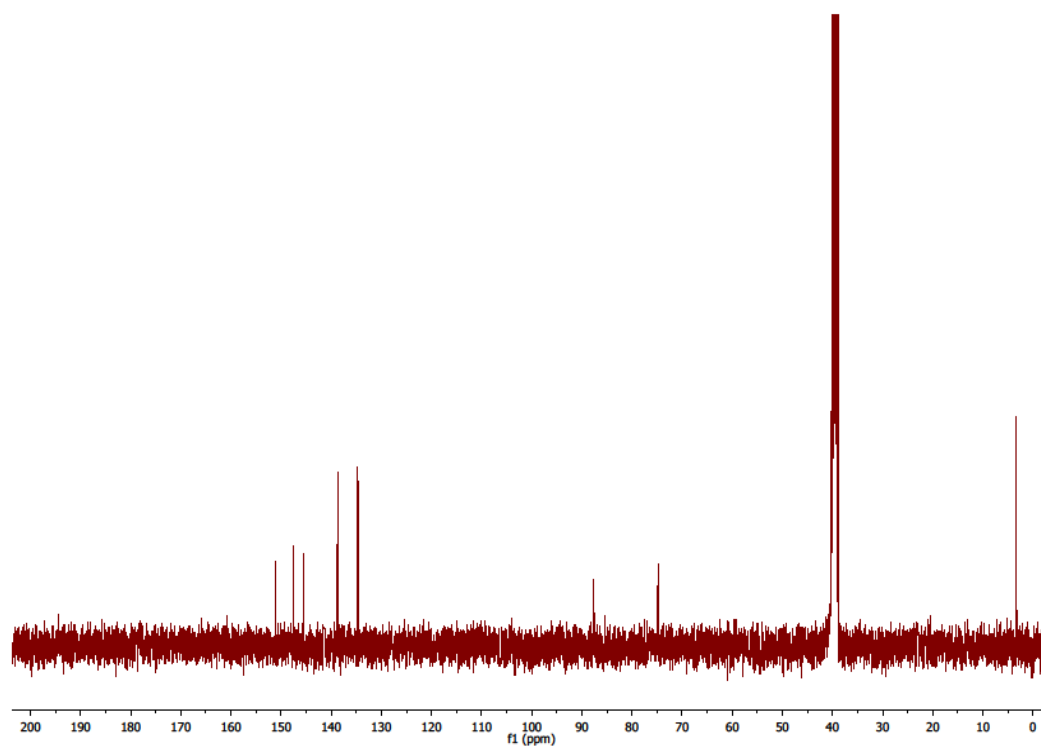

## *N*-(6-Methoxypyrimidin-4-yl)but-2-ynamide (**55**)

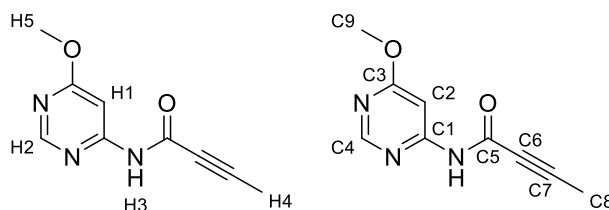

Prepared according to General Method 1 from 6-methoxypyrimidin-4-amine **39** (0.30 g, 2.40 mmol), *n*BuLi (5.03 mmol) and ethyl 2-butynoate **24** (0.34 mL, 2.88 mmol). The crude product was purified by column chromatography (SiO<sub>2</sub>, 30 g, 7:3 40-60 petroleum ether: EtOAc) to yield a pale brown solid (0.24 g, 1.36 mmol, 53%). R<sub>f</sub> = 0.47 (1:1 40-60 petroleum ether: EtOAc). Mpt (CH<sub>2</sub>Cl<sub>2</sub>): darkens >170 °C, decomp. >220 °C. IR  $\nu_{\text{max}}/\text{cm}^{-1}$  (neat): 3362 (w, br, N-H), 3203 (w, N-H), 3004 (w, C-H), 2228 (w, C≡C), 1677 (str, C=O), 1603 (med, C=C), 1570 (str, C=C), 1511 (str), 1482 (str, C=C/C=N), 1397 (str, C-O), 1329 (w), 1301 (w), 1262 (str), 1226 (med), 1193 (str), 1170 (med), 1073 (w), 1036 (med). <sup>1</sup>H NMR (400 MHz, d<sup>6</sup>-DMSO):  $\delta_{\text{H}}$  11.41 (1H, s, H3),  $\delta_{\text{H}}$  8.54 (1H, s, H2),  $\delta_{\text{H}}$  7.32 (1H, s, H1),  $\delta_{\text{H}}$  3.90 (3H, s, H5),  $\delta_{\text{H}}$  2.05 (3H, s, H4). <sup>13</sup>C NMR (100 MHz, d<sup>6</sup>-DMSO):  $\delta_{\text{C}}$  170.2 (C3),  $\delta_{\text{C}}$  157.9 (C1),  $\delta_{\text{C}}$  157.5 (C4),  $\delta_{\text{C}}$  151.8 (C5),  $\delta_{\text{C}}$  94.6 (C2),  $\delta_{\text{C}}$  87.1 (C6),  $\delta_{\text{C}}$  74.9 (C7),  $\delta_{\text{C}}$  53.8 (C9),  $\delta_{\text{C}}$  3.5 (C8). HRMS (FTMS ESI+) *m/z* found [M+H]<sup>+</sup> 192.0766, C<sub>9</sub>H<sub>10</sub>O<sub>2</sub>N<sub>3</sub><sup>+</sup> required 192.0768,  $\Delta$  ppm = -0.9 ppm.

<sup>1</sup>H NMR

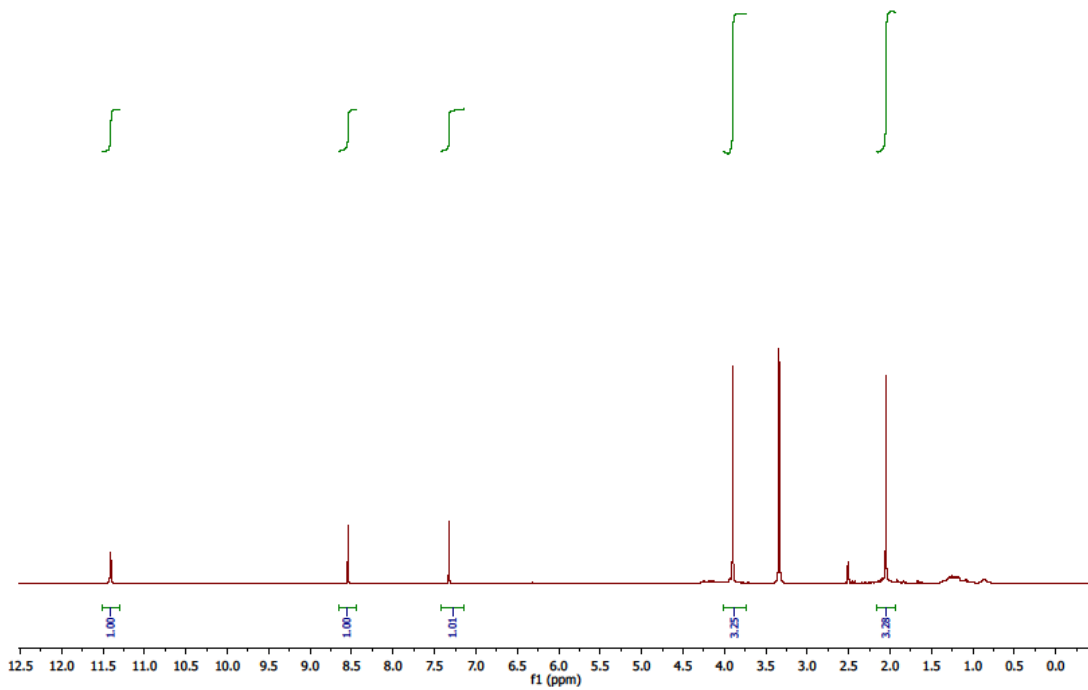

$^{13}\text{C}$  NMR

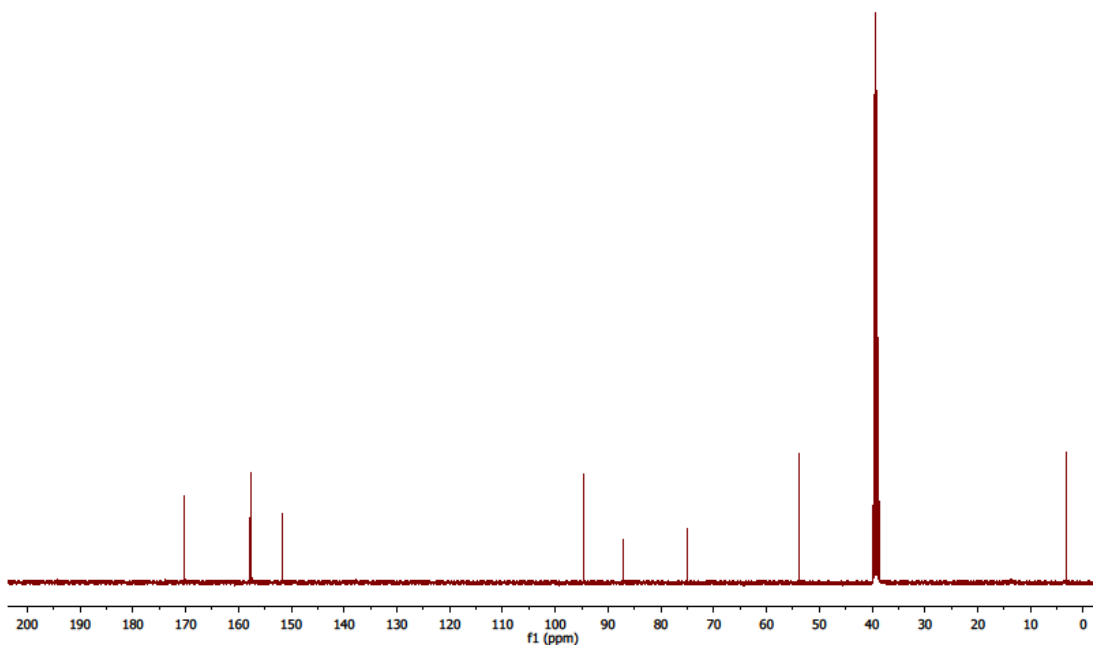

## *N*-(5-Bromopyrimidin-2-yl)but-2-ynamide (**56**)

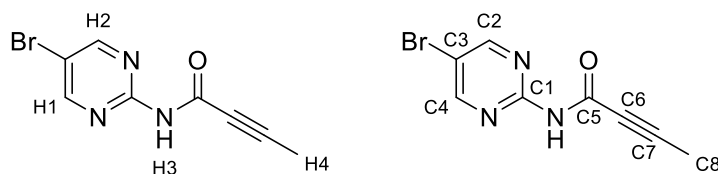

Prepared according to General Method 1 from 2-amino-5-bromopyrimidine **40** (0.10 g, 0.58 mmol),  $^n\text{BuLi}$  (1.21 mmol) and ethyl 2-butynoate **24** (0.08 mL, 0.69 mmol). The crude product was purified by column chromatography ( $\text{SiO}_2$ , 20 g, 1:1 40-60 petroleum ether: EtOAc) to yield a beige solid wax (0.09 g, 94% purity with  $\text{CH}_2\text{Cl}_2$ , 0.33 mmol, 58%). Further purification by preparative HPLC yielded spectroscopically pure material.  $R_f = 0.41$  (1:1 40-60 petroleum ether: EtOAc). Mpt ( $\text{CH}_2\text{Cl}_2$ ): darkens >130-147 °C, melts 152-155 °C. IR  $\nu_{\text{max}}/\text{cm}^{-1}$  (neat): 3220 (w, N-H), 3151 (w, C-H/N-H), 3071 (w, C-H), 2915 (w, C-H), 2227 (w,  $\text{C}\equiv\text{C}$ ), 1684 (str, C=O), 1583 (med, C=C), 1560 (med, C=C), 1491 (str, C=C/C=N), 1455 (w), 1428 (str), 1373 (str), 1329 (med), 1266 (med), 1234 (str), 1167 (med), 1124 (med), 1067 (med), 1025 (w), 1007 (w).  $^1\text{H}$  NMR (500 MHz,  $d^6$ -DMSO):  $\delta_{\text{H}}$  11.35 (1H, s, H3),  $\delta_{\text{H}}$  8.81 (2H, s, H1+H2),  $\delta_{\text{H}}$  2.02 (3H, s, H4).  $^{13}\text{C}$  NMR (125 MHz,  $d^6$ -DMSO):  $\delta_{\text{C}}$  158.8 (C2+C4),  $\delta_{\text{C}}$  155.8 (C1),  $\delta_{\text{C}}$  150.6 (C5),  $\delta_{\text{C}}$  113.9 (C3),  $\delta_{\text{C}}$  87.2 (C6),  $\delta_{\text{C}}$  75.5 (C7),  $\delta_{\text{C}}$  3.5 (C8). HRMS (TOF ES+)  $m/z$  found  $[\text{M}+\text{H}]^+$  239.9768,  $\text{C}_8\text{H}_7\text{ON}_3^{79}\text{Br}^+$  required 239.9772,  $\Delta$  ppm = -1.7 ppm.

56\_PROTON.015.esp

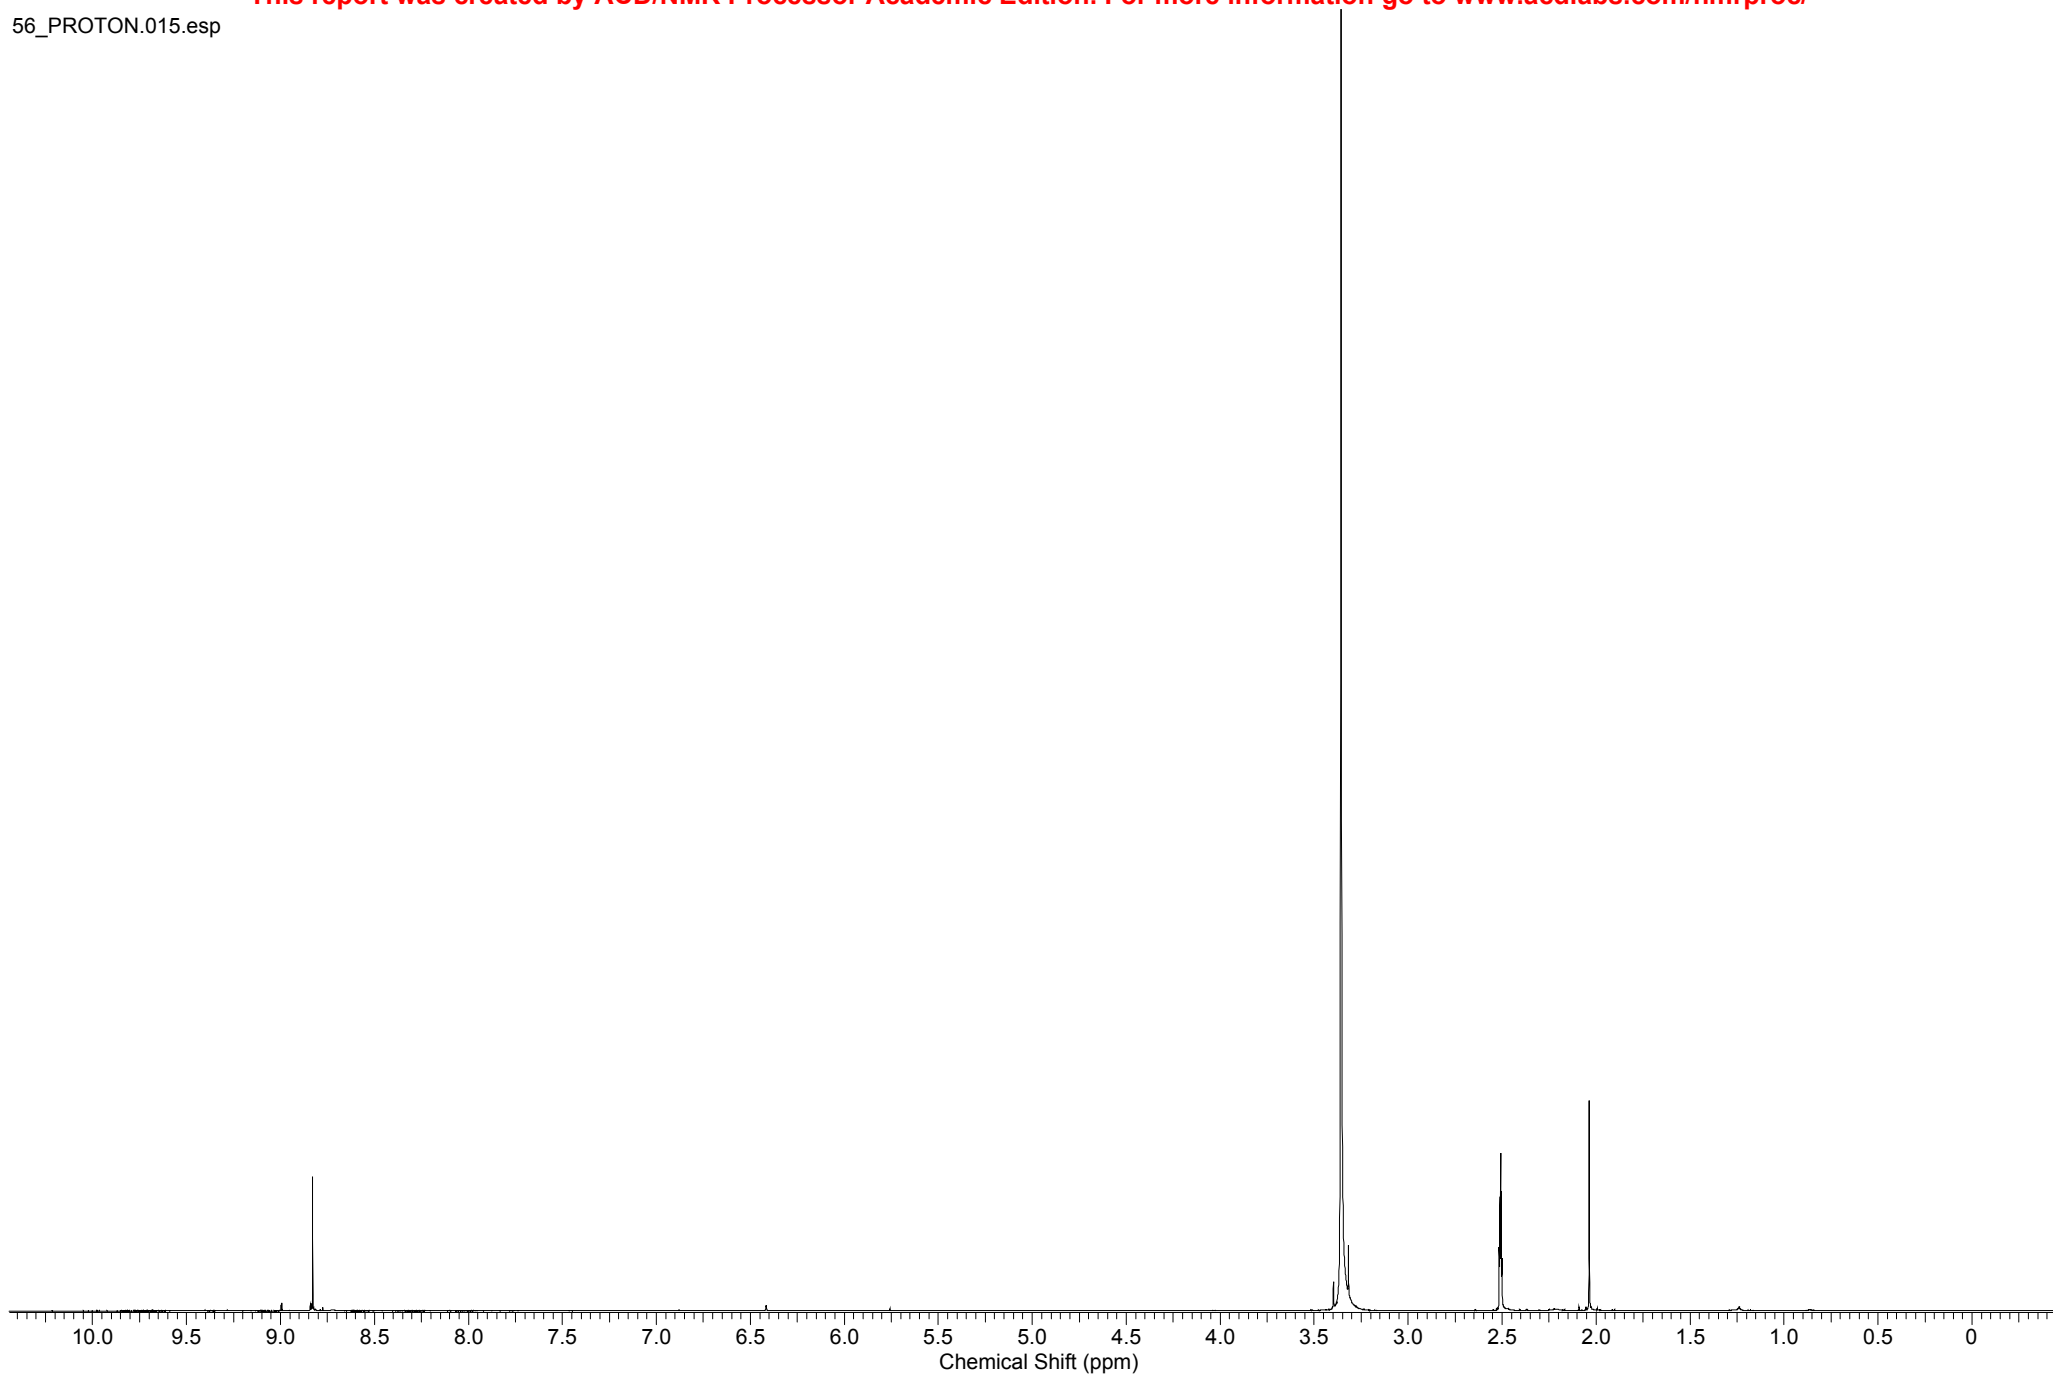

$^{13}\text{C}$  NMR

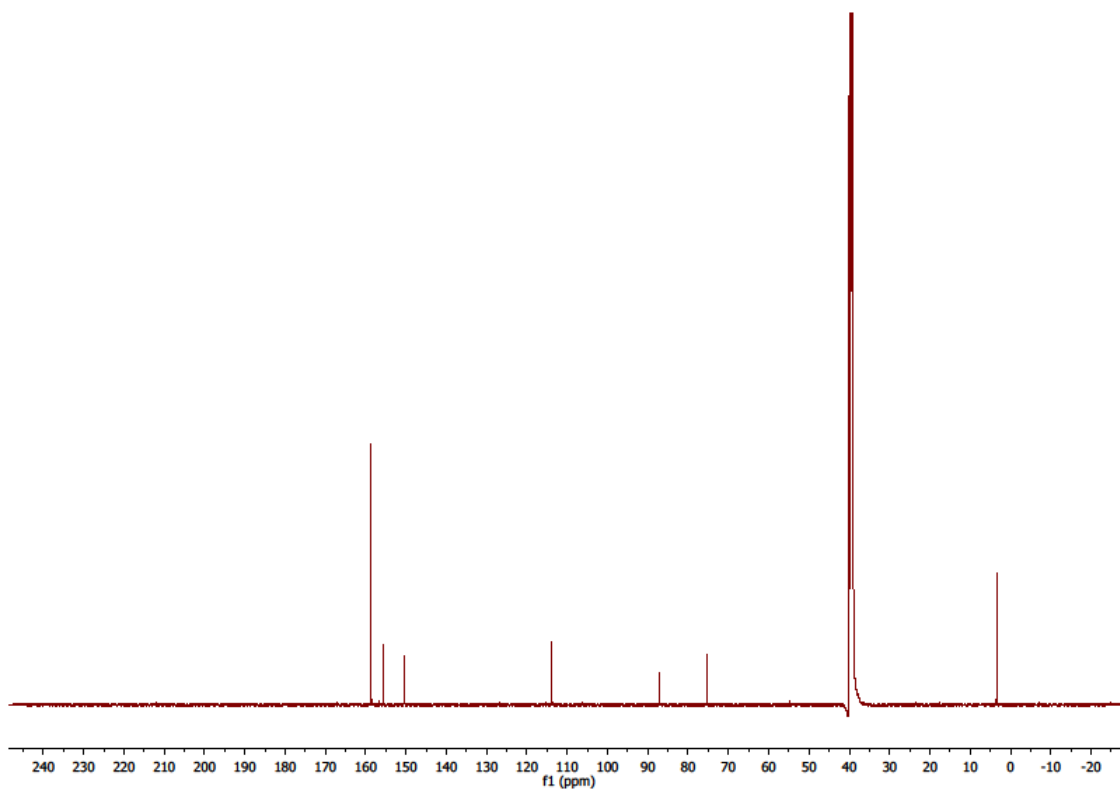

## *N*-(Quinolin-2-yl)but-2-ynamide (**57**)

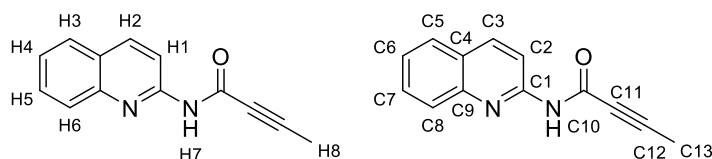

Prepared according to General Method 1 from 2-aminoquinoline **41** (0.21 g, 1.43 mmol), LDA (3.00 mmol) and ethyl 2-butynoate **24** (0.20 mL, 1.72 mmol). The crude product was purified by Combiflash Companion (SiO<sub>2</sub>, 12 g, 0-25% EtOAc in heptane) to yield an ochre solid (0.22 g, 1.06 mmol, 74%).  $R_f = 0.50$  (1:1 EtOAc: heptane). Mpt (CH<sub>2</sub>Cl<sub>2</sub>): phase change >100 °C then melted 157-159 °C. IR  $\nu_{\max}/\text{cm}^{-1}$  (neat): 3127 (w) 2941 (w, br, C-H), 2238 (w, C≡C), 1671 (str, C=O), 1618 (w), 1594 (str, C=C), 1577 (str, C=C), 1548 (w), 1526 (med), 1499 (str), 1425 (str), 1381 (w), 1320 (str), 1291 (str), 1264 (str), 1249 (str), 1237 (str), 1157 (w), 1146 (w), 1121 (str), 1087 (w), 1017 (w). <sup>1</sup>H NMR (400 MHz, d<sup>6</sup>-DMSO):  $\delta_{\text{H}}$  11.31 (1H, s, H7),  $\delta_{\text{H}}$  8.35 (1H, d,  $J = 9.0$  Hz, H2),  $\delta_{\text{H}}$  8.14 (1H, d,  $J = 9.0$  Hz, H1),  $\delta_{\text{H}}$  7.92 (1H, dd,  $J = 8.1, 1.1$  Hz, H3 or H6),  $\delta_{\text{H}}$  7.83-7.81 (1H, m, H3 or H6),  $\delta_{\text{H}}$  7.72 (1H, ddd,  $J = 8.4, 6.9, 1.5$  Hz, H5),  $\delta_{\text{H}}$  7.51 (1H, ddd,  $J = 8.1, 6.9, 1.2$ , H4),  $\delta_{\text{H}}$  2.05 (3H, s, H8). <sup>13</sup>C NMR (100 MHz, d<sup>6</sup>-DMSO):  $\delta_{\text{C}}$  151.9 (C1 or C10),  $\delta_{\text{C}}$  151.1 (C1 or C10),  $\delta_{\text{C}}$  146.4 (C3),  $\delta_{\text{C}}$  138.4 (C9),  $\delta_{\text{C}}$  130.2 (C7),  $\delta_{\text{C}}$  127.9 (C5 or C8),  $\delta_{\text{C}}$  127.3 (C5 or C8),  $\delta_{\text{C}}$  125.9 (C4),  $\delta_{\text{C}}$  125.4 (C6),  $\delta_{\text{C}}$  115.1 (C2),  $\delta_{\text{C}}$  86.5 (C11),  $\delta_{\text{C}}$  75.7 (C12),  $\delta_{\text{C}}$  3.5 (C13). HRMS (FTMS ESI+)  $m/z$  found [M+H]<sup>+</sup> 211.0859, C<sub>13</sub>H<sub>11</sub>N<sub>2</sub>O<sup>+</sup> required 211.0866,  $\Delta$  ppm = -3.1 ppm.

$^1\text{H}$  NMR

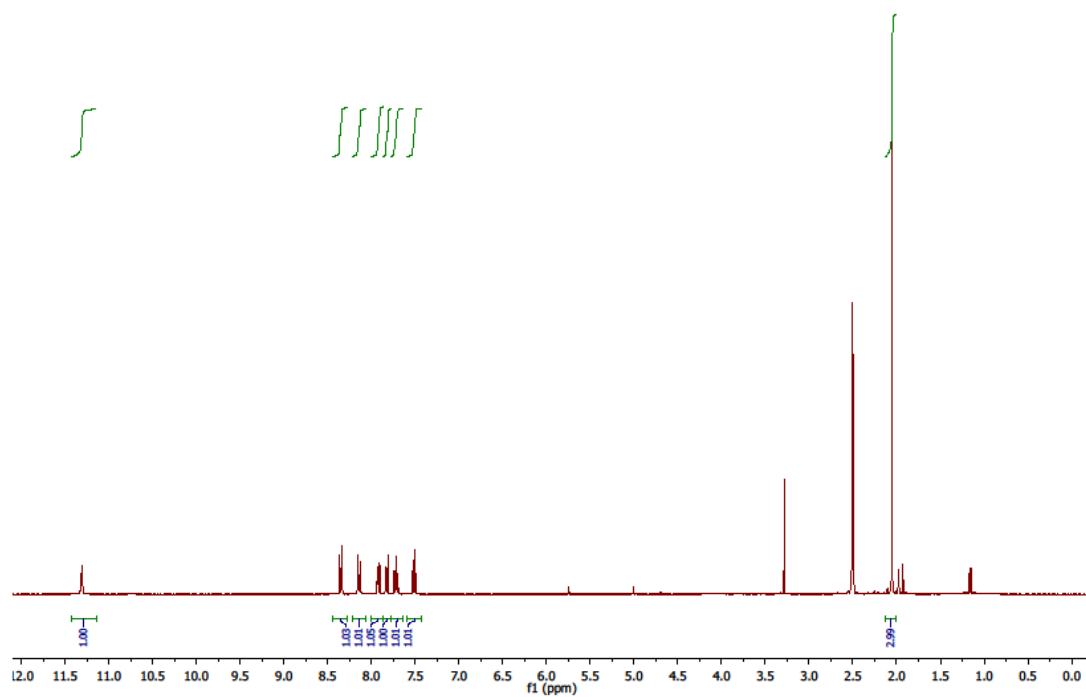

$^{13}\text{C}$  NMR

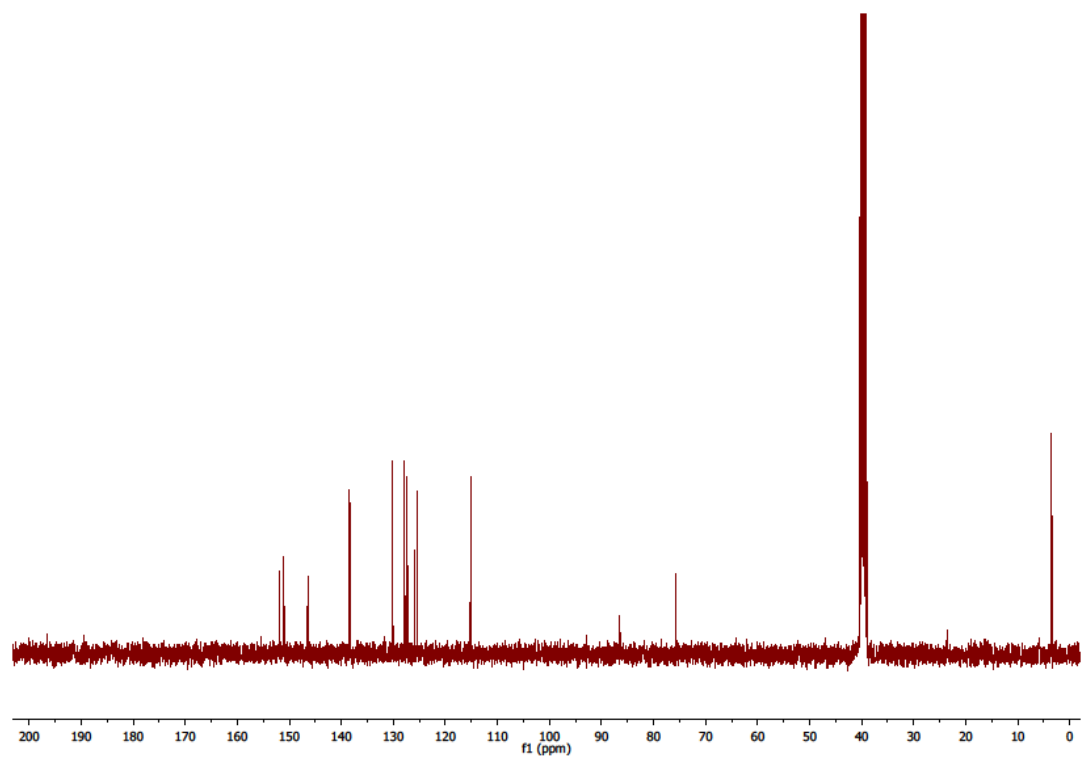



*N*-(4,6-bis(ethylthio)pyrimidin-2-yl)but-2-ynamide (**58**)

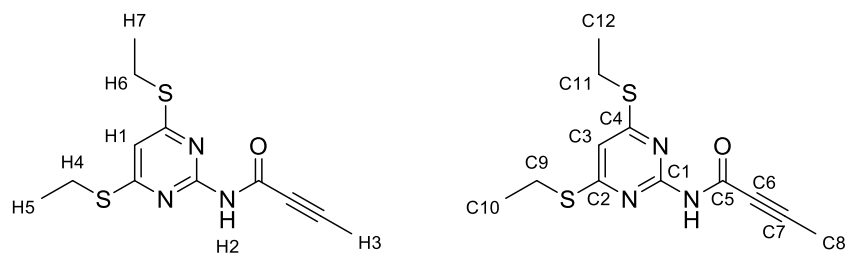

Prepared according to General Method 1 from 2-amino-4,6-bis(ethylthio)pyrimidine **42** (0.31 g, 1.43 mmol), LDA (3.00 mmol) and ethyl 2-butynoate **24** (0.20 mL, 1.72 mmol). The crude product was purified by Combiflash Companion (SiO<sub>2</sub>, 24 g, 0-50% EtOAc in heptane) to yield a red gum (0.12 g, 0.44 mmol, 31%). *R*<sub>f</sub> = 0.28 (3:1 heptane: EtOAc). IR  $\nu_{\text{max}}/\text{cm}^{-1}$  (neat): 3284 (w), 3181 (w), 3100 (w), 3036 (w), 2966 (w, C-H), 2925 (w, C-H), 2864 (w, C-H), 2236 (med, C≡C), 1650 (str, C=O), 1554 (str, C=C), 1515 (str, C=C), 1494 (str, C=C), 1454 (w), 1427 (med), 1398 (w), 1377 (w), 1341 (str), 1330 (str), 1261 (str), 1229 (str), 1109 (str), 1082 (str), 1002 (w). <sup>1</sup>H NMR (400 MHz, d<sup>6</sup>-DMSO):  $\delta_{\text{H}}$  10.97 (1H, s, H2),  $\delta_{\text{H}}$  6.97 (1H, s, H1),  $\delta_{\text{H}}$  3.15 (4H, q, *J* = 7.3 Hz, H4+H6),  $\delta_{\text{H}}$  2.04 (3H, s, H3),  $\delta_{\text{H}}$  1.29 (6H, t, *J* = 7.3 Hz, H5+H7). <sup>13</sup>C NMR (100 MHz, d<sup>6</sup>-DMSO):  $\delta_{\text{C}}$  168.9 (C2+C4),  $\delta_{\text{C}}$  155.4 (C1),  $\delta_{\text{C}}$  150.9 (C5),  $\delta_{\text{C}}$  109.7 (C3),  $\delta_{\text{C}}$  87.9 (C6),  $\delta_{\text{C}}$  75.6 (C7),  $\delta_{\text{C}}$  23.1 (C9+C11),  $\delta_{\text{C}}$  14.4 (C10+C12),  $\delta_{\text{C}}$  3.5 (C8). HRMS (TOF ES+) *m/z* found [M+H]<sup>+</sup> 282.0740, C<sub>12</sub>H<sub>16</sub>ON<sub>3</sub>S<sub>2</sub><sup>+</sup> required 282.0735,  $\Delta$  ppm = 1.8 ppm.

$^1\text{H}$  NMR

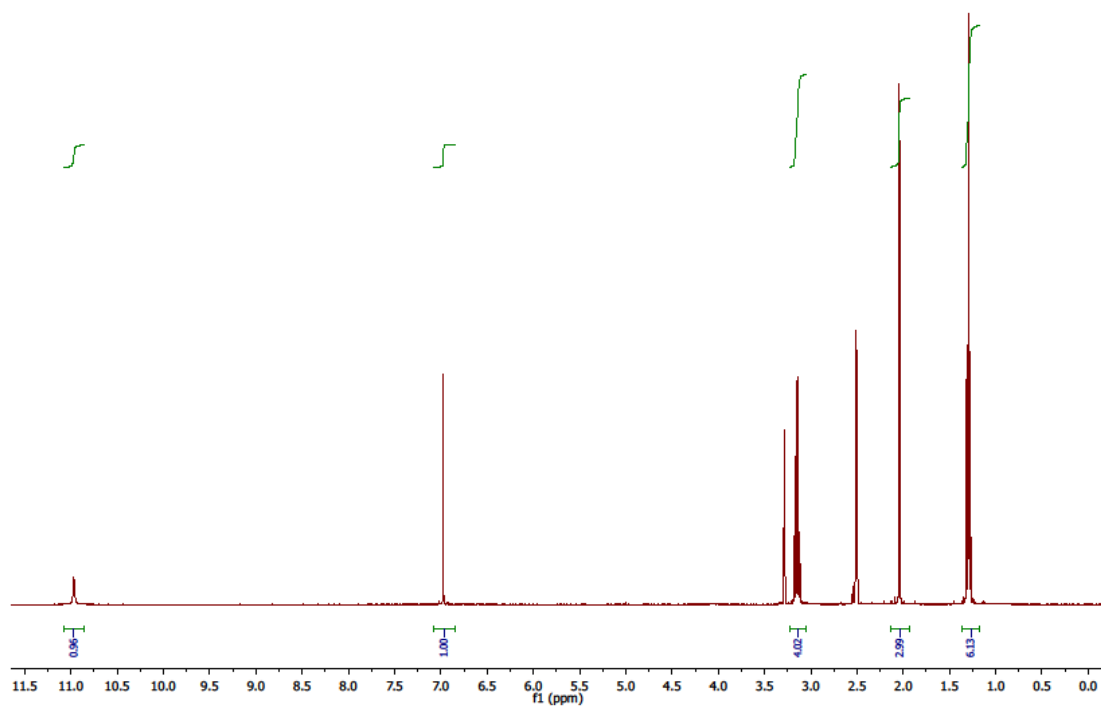

$^{13}\text{C}$  NMR

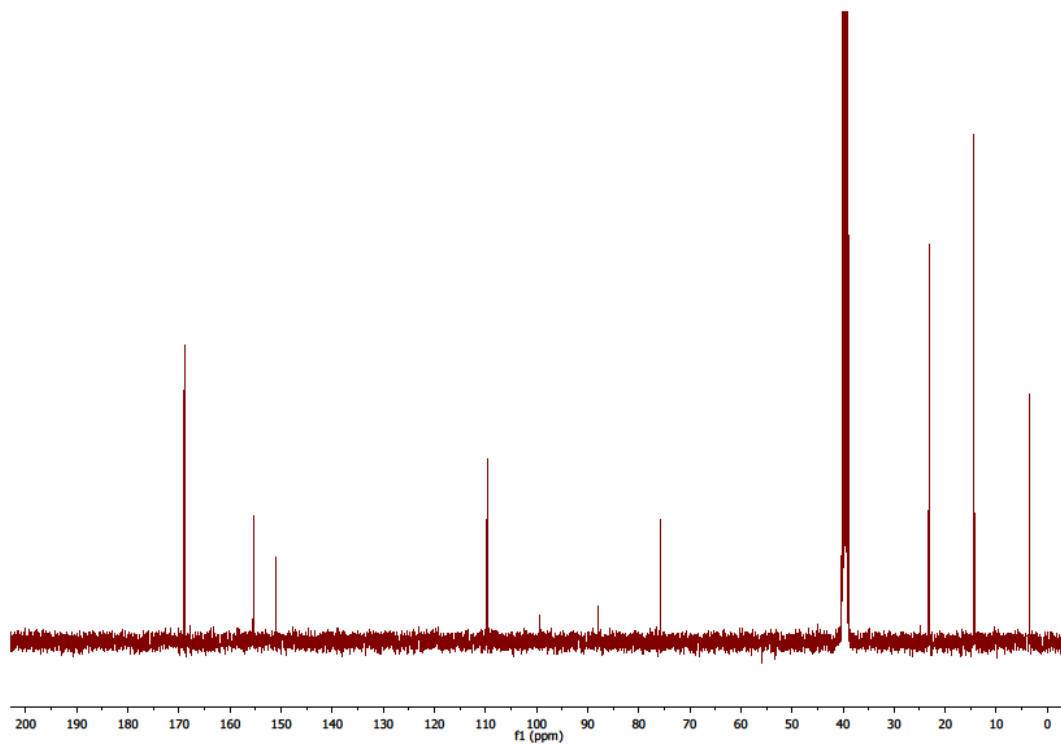

## 9-(Benzyloxy)-4-methyl-2*H*-pyrido[1,2-*a*]pyrimidin-2-one (**62**)

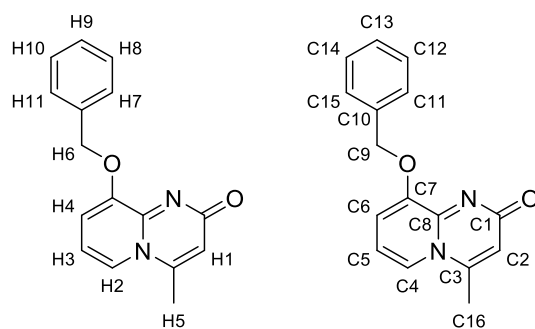

Prepared according to General Method 1 from 2-amino-3-benzyloxypyridine **59** (700 mg, 3.50 mmol), *n*BuLi (7.34 mmol) and ethyl 2-butynoate **24** (0.489 mL, 4.20 mmol). The crude product was purified by column chromatography (SiO<sub>2</sub>, elution gradient 0 to 100% EtOAc in heptane, followed by a second column, elution gradient 0 to 10% MeOH in CH<sub>2</sub>Cl<sub>2</sub>) to yield a sticky cream foam (320 mg, 34%). R<sub>f</sub> = 0.58 (8:2 CH<sub>2</sub>Cl<sub>2</sub>:MeOH). IR  $\nu_{\max}/\text{cm}^{-1}$  (neat): 3479 (w), 3347 (w), 3262 (w), 3085 (w), 3034 (w, C-H), 2916 (w, C-H), 2871 (w, C-H), 1640 (str, C=O), 1588 (w), 1560 (str), 1470 (str), 1451 (str), 1435 (str), 1392 (med), 1374 (str), 1290 (w), 1268 (str), 1218 (w), 1198 (med), 1163 (str), 1098 (w), 1041 (med), 1015 (str). <sup>1</sup>H NMR (400 MHz, d<sup>6</sup>-DMSO):  $\delta_{\text{H}}$  7.94-7.79 (1H, m, H2),  $\delta_{\text{H}}$  7.56-7.45 (2H, m, H7+H11),  $\delta_{\text{H}}$  7.45-7.39 (2H, m),  $\delta_{\text{H}}$  7.39-7.33 (1H, m),  $\delta_{\text{H}}$  7.23-7.09 (1H, m),  $\delta_{\text{H}}$  6.87 (1H, t, *J* = 7.4 Hz),  $\delta_{\text{H}}$  6.47-6.34 (1H, m),  $\delta_{\text{H}}$  5.21 (2H, s, H6),  $\delta_{\text{H}}$  2.51 (3H, s, H5). <sup>13</sup>C NMR (100 MHz, d<sup>6</sup>-DMSO):  $\delta_{\text{C}}$  168.8, 148.1, 146.9, 146.6, 136.1, 128.4, 128.1, 127.9, 121.9, 115.2, 112.4, 111.4, 70.3, 18.9. HRMS (TOF ES+) *m/z* found [M+H]<sup>+</sup> 267.1135, C<sub>16</sub>H<sub>15</sub>N<sub>2</sub>O<sub>2</sub><sup>+</sup> required 267.1134,  $\Delta$  ppm = 0.4 ppm.

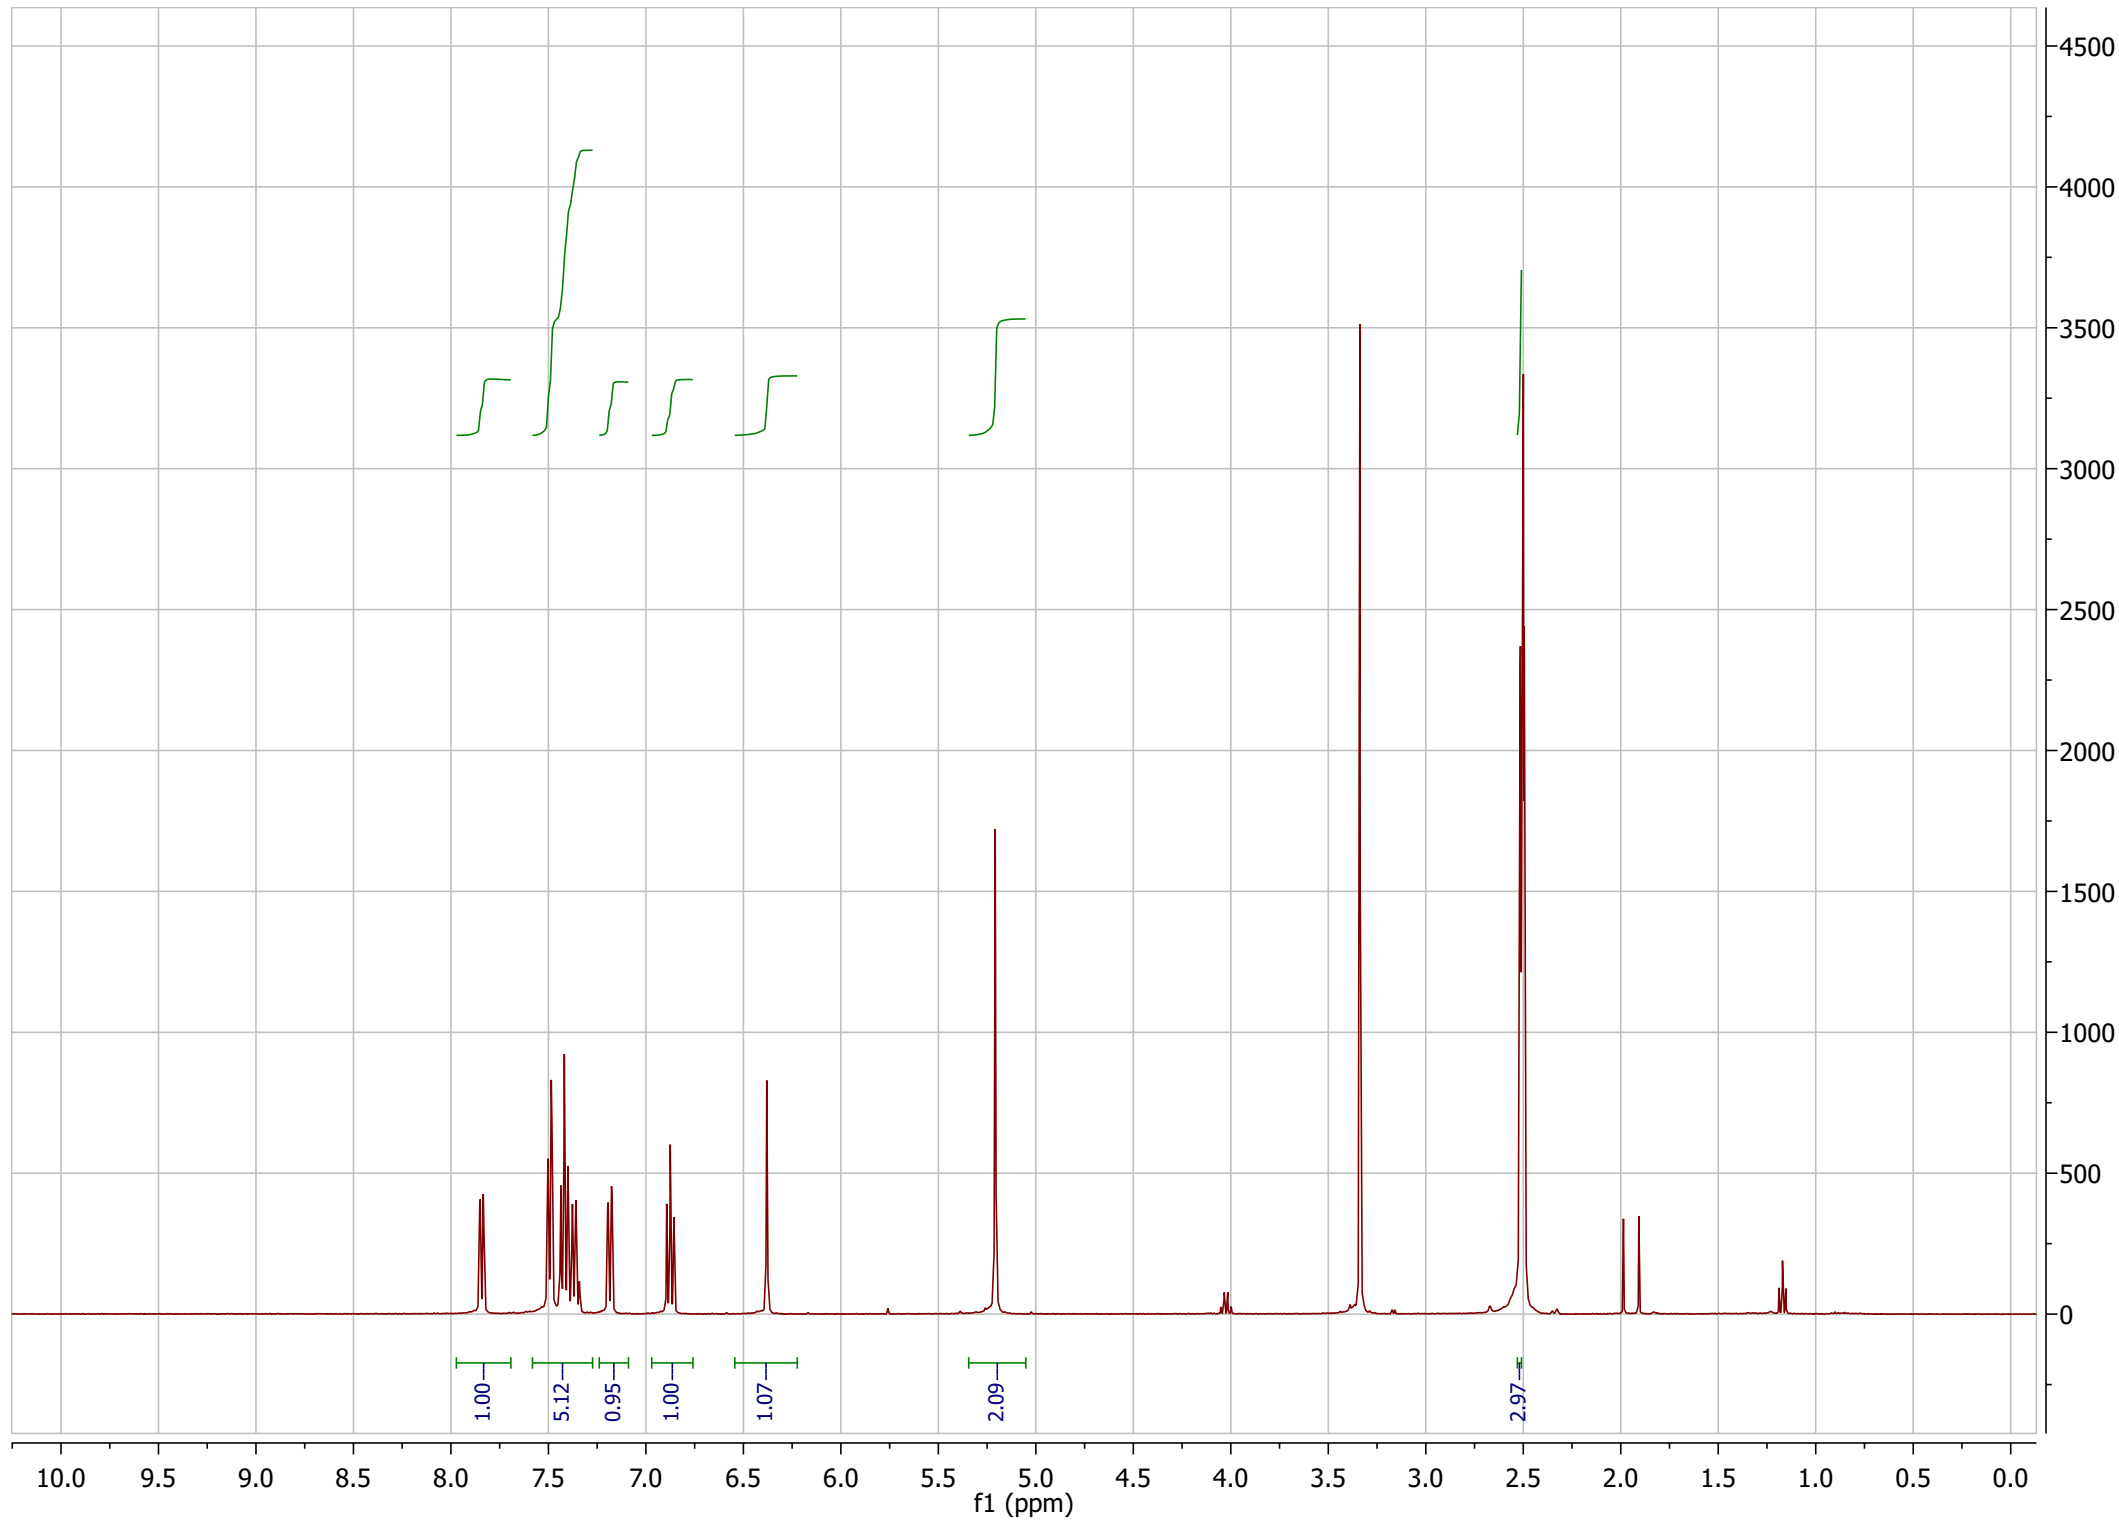

Name thomas alanine  
M No kgbw666  
Notebook Ref EN07919-84-01  
carbon.az DMSO /opt/topspin2.1 chem 8

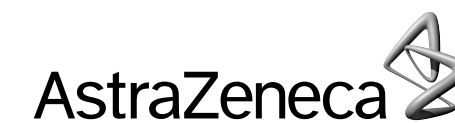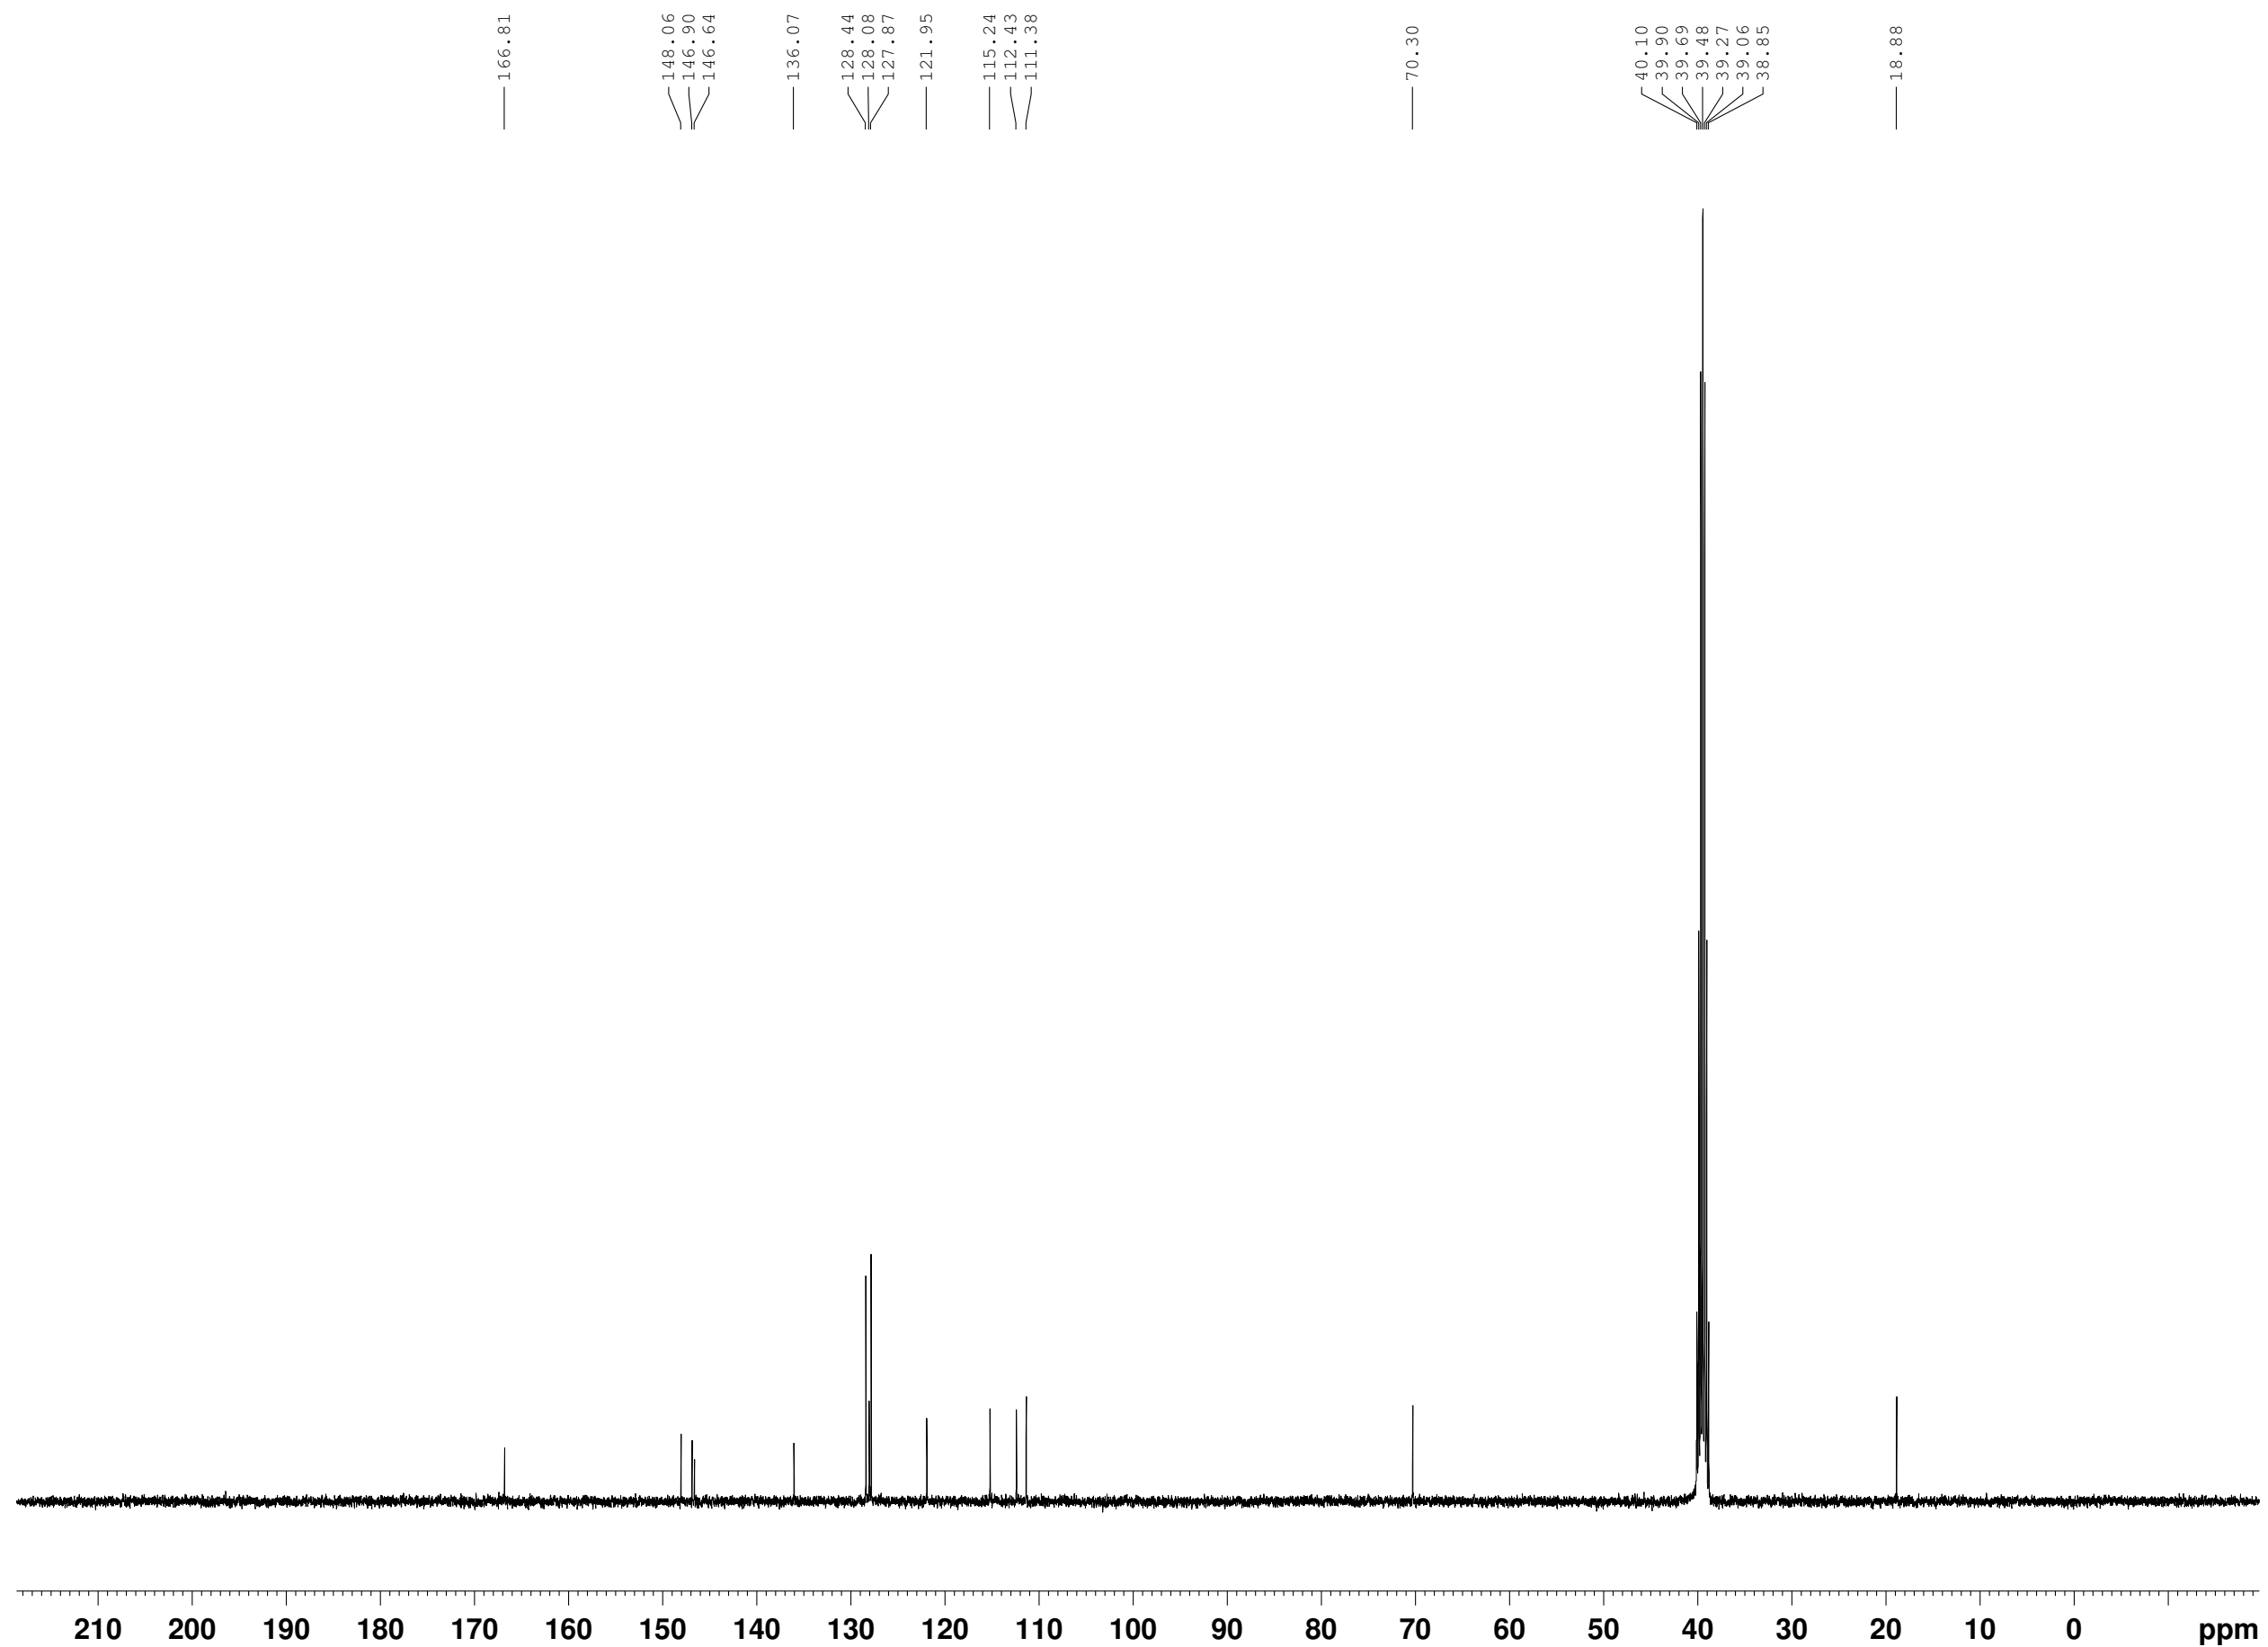

```
NAME 151019
EXPNO 71
PROCNO 1
Date_ 20151019
Time 19.50
INSTRUM AV400_14S1A
PROBHD 5 mm QNP 1H/13
PULPROG zgpg30
TD 65536
SOLVENT DMSO
NS 800
DS 4
SWH 23980.814 Hz
FIDRES 0.365918 Hz
AQ 1.3664756 sec
RG 29193
DW 20.850 use
DE 20.00 use
TE 295.0 K
D1 2.00000000 sec
D11 0.03000000 sec
TD0 1
```

```
===== CHANNEL f1 =====
NUC1 13C
P1 11.00 use
PL1 3.70 dB
SFO1 100.6228298 MHz
```

```
===== CHANNEL f2 =====
CPDPRG2 waltz16
NUC2 1H
PCPD2 95.00 use
PL2 -2.00 dB
PL12 15.00 dB
PL13 16.00 dB
SFO2 400.1316005 MHz
SI 32768
SF 100.6128193 MHz
WDW EM
SSB 0
LB 1.00 Hz
GB 0
PC 1.40
```

#### 4-Methyl-2*H*-pyrimido[1,2-*a*]pyrimidin-2-one (**63**)

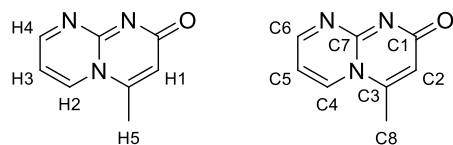

Prepared according to General Method 1 from 2-aminopyrimidine **60** (0.14 g, 1.43 mmol), LDA (3.00 mmol) and ethyl 2-butynoate **24** (0.20 mL, 1.72 mmol). The crude product was purified by Combiflash Companion (SiO<sub>2</sub>, 12 g, EtOAc) to yield an orange solid (0.04 g, 0.25 mmol, 17%). *R<sub>f</sub>* = 0.12 (EtOAc). Mpt (CH<sub>2</sub>Cl<sub>2</sub>): 159-162 °C. IR  $\nu_{\text{max}}/\text{cm}^{-1}$  (neat): 3105 (w, C-H), 3074 (w, C-H), 3012 (w, C-H), 2917 (w, C-H), 1683 (str, C=O), 1627 (med, C=O), 1565 (med, C=C), 1529 (str, C=C), 1461 (str), 1402 (str), 1352 (str), 1260 (w), 1235 (med), 1199 (w), 1188 (w), 1168 (med), 1125 (med), 1074 (w), 1042 (w), 1025 (w). <sup>1</sup>H NMR (400 MHz, d<sup>6</sup>-DMSO):  $\delta_{\text{H}}$  9.21 (1H, dd, *J* = 7.0, 2.3 Hz, H2 or H4),  $\delta_{\text{H}}$  9.12 (1H, dd, *J* = 3.9, 2.3 Hz, H2 or H4),  $\delta_{\text{H}}$  7.37 (1H, dd, *J* = 7.0, 3.9 Hz, H3),  $\delta_{\text{H}}$  6.37 (1H, s, H1),  $\delta_{\text{H}}$  2.41 (3H, s, H5). <sup>13</sup>C NMR (100 MHz, d<sup>6</sup>-DMSO):  $\delta_{\text{C}}$  167.3 (C1 or C7),  $\delta_{\text{C}}$  163.3 (C4),  $\delta_{\text{C}}$  157.4 (C1 or C7),  $\delta_{\text{C}}$  151.2 (C3),  $\delta_{\text{C}}$  136.6 (C6),  $\delta_{\text{C}}$  112.4 (C5),  $\delta_{\text{C}}$  102.9 (C2),  $\delta_{\text{C}}$  24.6 (C8). HRMS (TOF ES+) *m/z* found [M+H]<sup>+</sup> 162.0673, C<sub>8</sub>H<sub>8</sub>N<sub>3</sub>O<sup>+</sup> required 162.0667,  $\Delta$  ppm = 3.7 ppm.

$^1\text{H}$  NMR

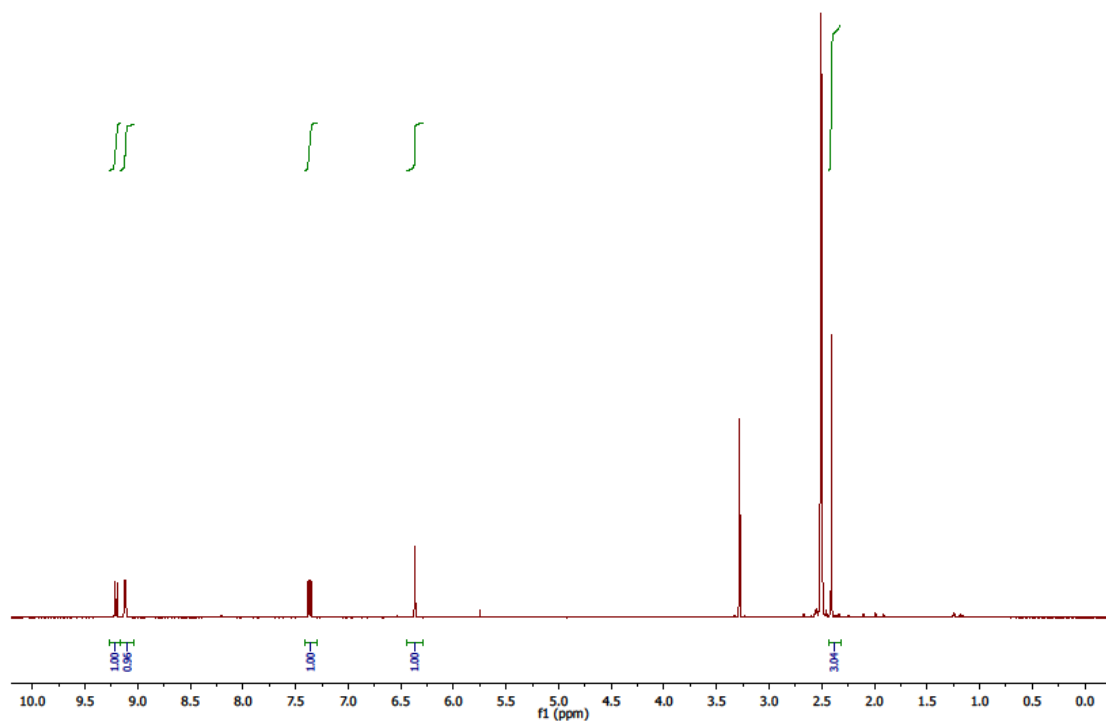

$^{13}\text{C}$  NMR

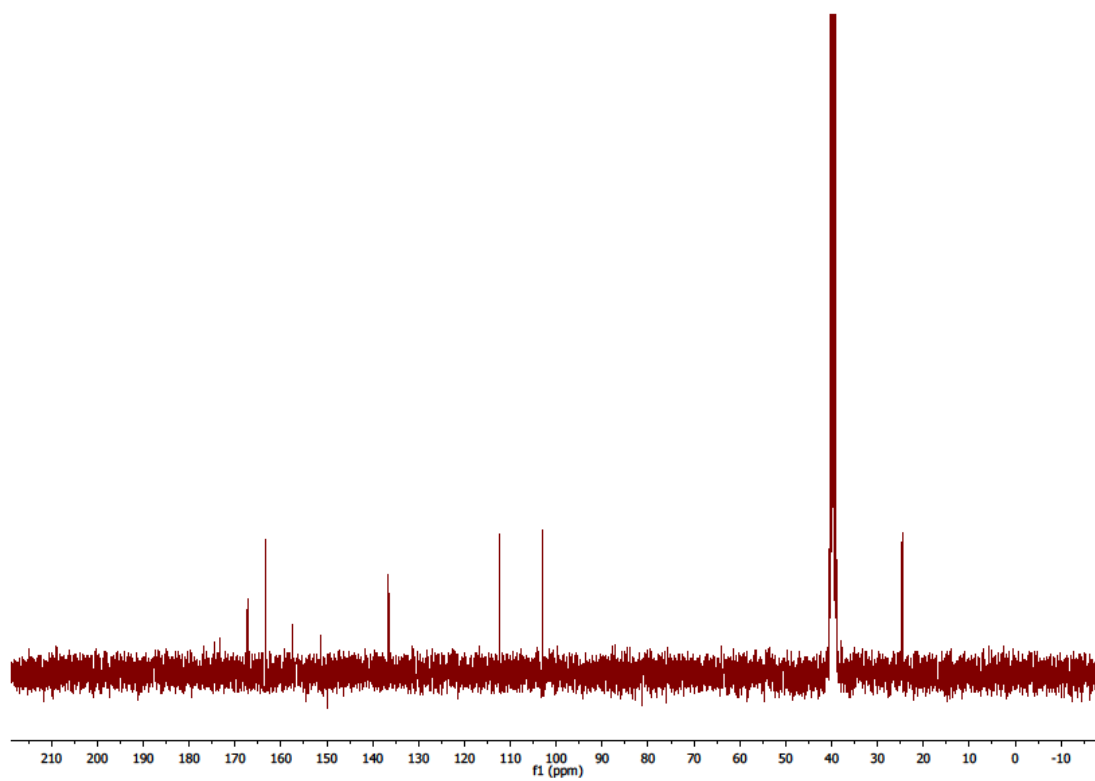

## 9-Ethoxy-4-methyl-2*H*-pyrazino[1,2-*a*]pyrimidin-2-one (**64**)

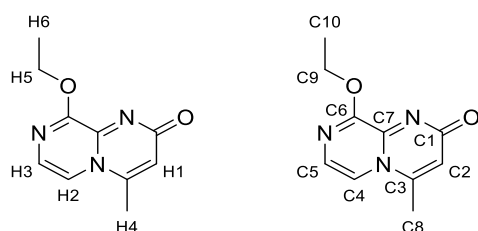

Prepared according to General Method 1 from 2-amino-3-ethoxypyrazine **61** (0.14 g, 1.43 mmol), LDA (3.00 mmol) and ethyl 2-butynoate **24** (0.20 mL, 1.72 mmol). The crude product was purified by Combiflash Companion (SiO<sub>2</sub>, 12 g, 0-50% EtOAc in heptane) to yield a pale yellow solid (0.11 g, 0.54 mmol, 38%).  $R_f = 0.17$  (9:1 CH<sub>2</sub>Cl<sub>2</sub>: MeOH). Mpt (H<sub>2</sub>O/MeCN): 213-214 °C. IR  $\nu_{\max}/\text{cm}^{-1}$  (neat): 3126 (w, C-H), 2997 (w, C-H), 1646 (str, C=O), 1592 (str, C=C), 1541 (str, C=C), 1476 (str), 1432 (w), 1406 (w), 1393 (med), 1369 (str), 1326 (str), 1303 (w), 1272 (w), 1245 (w), 1216 (w), 1201 (w), 1184 (str), 1139 (w), 1041 (med), 1021 (med). <sup>1</sup>H NMR (400 MHz, d<sup>6</sup>-DMSO):  $\delta_H$  7.73 (1H, d,  $J = 5.0$  Hz, H2),  $\delta_H$  7.38 (1H, d,  $J = 5.0$  Hz, H3),  $\delta_H$  6.47 (1H, d,  $J = 0.9$  Hz, H1),  $\delta_H$  4.44 (2H, q,  $J = 7.1$  Hz, H5),  $\delta_H$  1.41 (3H, t,  $J = 7.1$  Hz, H6). H4 obscured by DMSO signal. <sup>13</sup>C NMR (100 MHz, d<sup>6</sup>-DMSO):  $\delta_C$  167.7 (C6),  $\delta_C$  155.8 (C1),  $\delta_C$  147.3 (C3),  $\delta_C$  140.3 (C7),  $\delta_C$  124.2 (C5),  $\delta_C$  116.5 (C2),  $\delta_C$  115.2 (C4),  $\delta_C$  63.5 (C9),  $\delta_C$  18.2 (C8),  $\delta_C$  14.2 (C10). HRMS (FTMS ESI+)  $m/z$  found  $[M+H]^+$  206.0938, C<sub>10</sub>H<sub>12</sub>N<sub>3</sub>O<sub>2</sub><sup>+</sup> required 206.0930,  $\Delta$  ppm = 3.9 ppm and  $[M+Na]^+$  228.0758, C<sub>10</sub>H<sub>11</sub>N<sub>3</sub>O<sub>2</sub>Na<sup>+</sup> required 228.0749,  $\Delta$  ppm = 3.9 ppm.



$^1\text{H}$  NMR

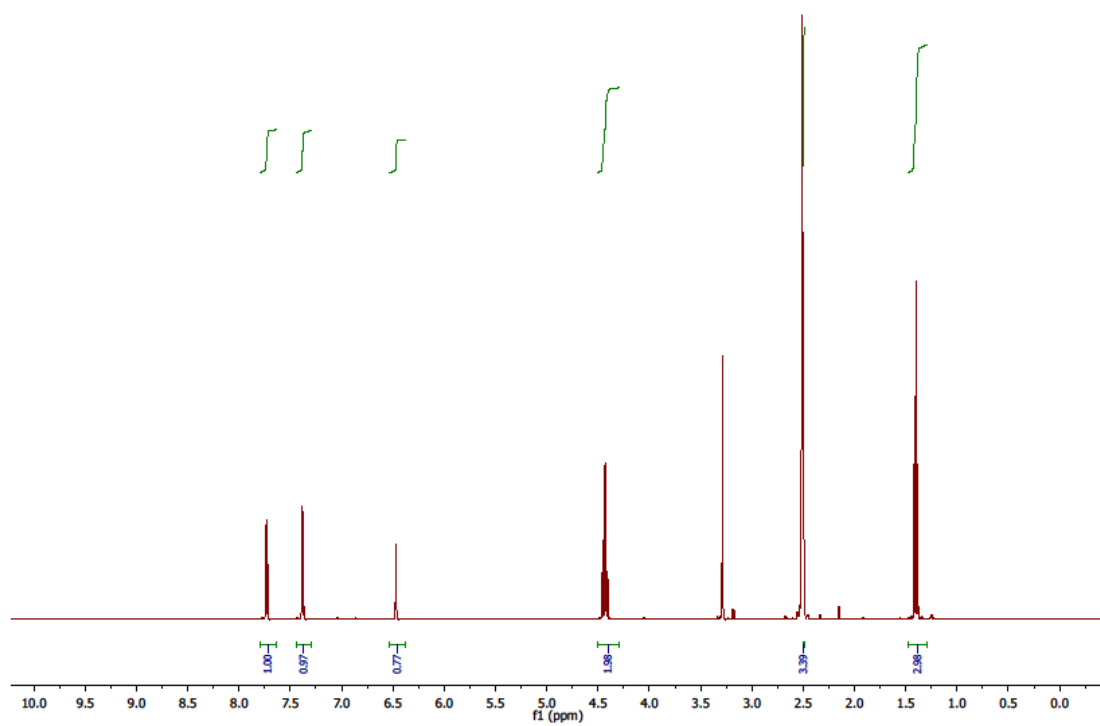

$^{13}\text{C}$  NMR

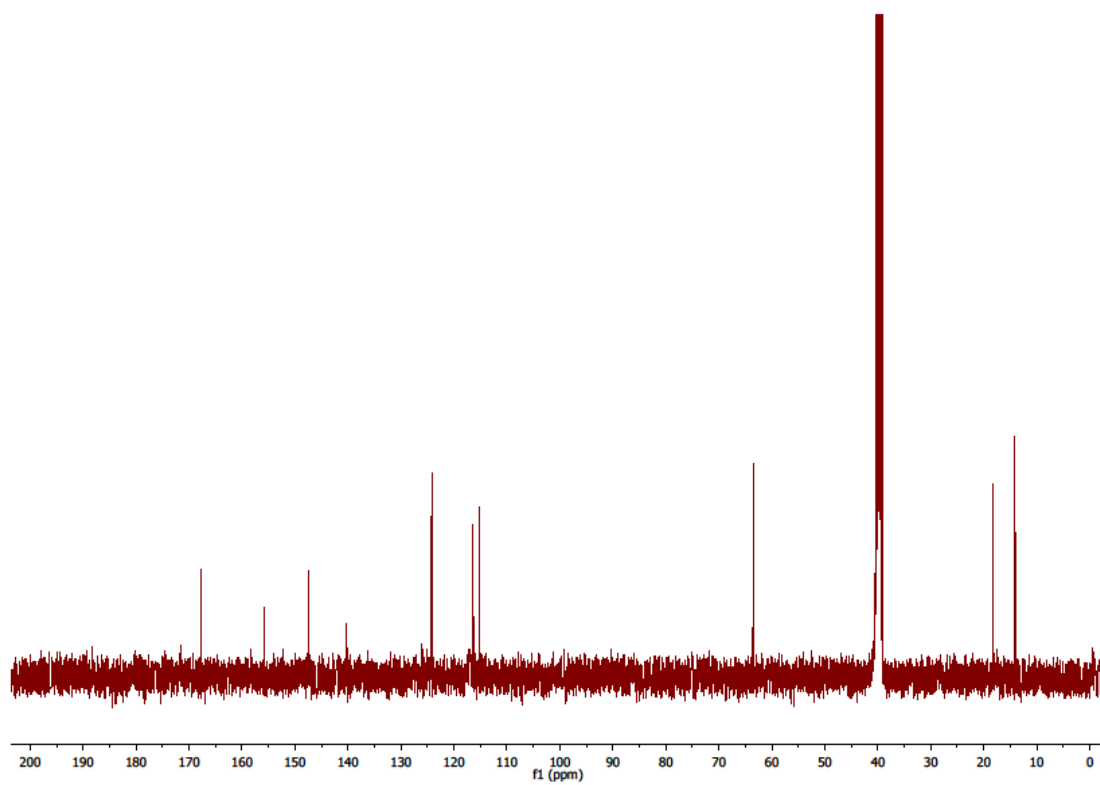

#### 4-(Trifluoromethyl)-2*H*-pyrido[1,2-*a*]pyrimidin-2-one (**66**)

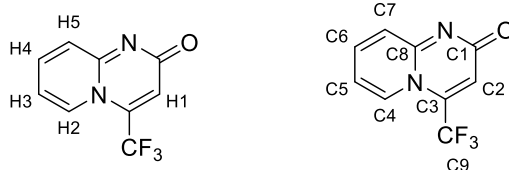

Prepared according to General Method 1 from 2-aminopyridine **23** (0.10 g, 1.06 mmol), *n*BuLi (2.23 mmol) and ethyl 4,4,4-trifluoromethylpropynoate **65** (0.18 mL, 1.28 mmol). The crude product was purified by column chromatography (SiO<sub>2</sub>, 20 g, 3:1 40-60 petroleum ether: EtOAc) to yield a yellow wax (0.10 g, 96% purity with 2-aminopyridine, 0.42 mmol, 40%). *R<sub>f</sub>* = 0.32 (3:1 40-60 petroleum ether: EtOAc). IR  $\nu_{\text{max}}/\text{cm}^{-1}$  (neat): 3066 (w, C-H), 2924 (w, C-H), 1700 (str, C=O), 1638 (med, C=C), 1576 (w), 1534 (w), 1483 (str), 1456 (str), 1437 (med), 1365 (w), 1284 (str), 1252 (w), 1173 (str), 1133 (str), 1098 (str), 1020 (w). <sup>1</sup>H NMR (500 MHz, d<sup>6</sup>-DMSO):  $\delta_{\text{H}}$  9.06-9.04 (1H, m, H2),  $\delta_{\text{H}}$  8.14 (1H, ddd, *J* = 8.6, 6.8, 1.6 Hz, H4),  $\delta_{\text{H}}$  7.89 (1H, d, *J* = 8.8 Hz, H5),  $\delta_{\text{H}}$  7.53 (1H, app dt, *J* = 1.3, 7.0 Hz, H3),  $\delta_{\text{H}}$  6.84 (1H, s, H1). <sup>13</sup>C NMR (125 MHz, d<sup>6</sup>-DMSO):  $\delta_{\text{C}}$  157.4 (C1),  $\delta_{\text{C}}$  151.7 (C8),  $\delta_{\text{C}}$  151.0 (q, <sup>2</sup>*J*<sub>C-F</sub> = 34 Hz, C3),  $\delta_{\text{C}}$  139.4 (C6),  $\delta_{\text{C}}$  127.7 (C4),  $\delta_{\text{C}}$  126.4 (C7),  $\delta_{\text{C}}$  120.9 (q, <sup>1</sup>*J*<sub>C-F</sub> = 276 Hz, C9),  $\delta_{\text{C}}$  118.1 (C5),  $\delta_{\text{C}}$  100.1 (C2). <sup>19</sup>F NMR (162 MHz, d<sup>6</sup>-DMSO):  $\delta_{\text{F}}$  -68.66. HRMS (FTMS ESI+) *m/z* found [M+H]<sup>+</sup> 215.0417, C<sub>9</sub>H<sub>6</sub>ON<sub>2</sub>F<sub>3</sub><sup>+</sup> required 215.0427,  $\Delta$  ppm = -4.5 ppm. Data consistent with literature values.<sup>2</sup>

$^1\text{H}$  NMR

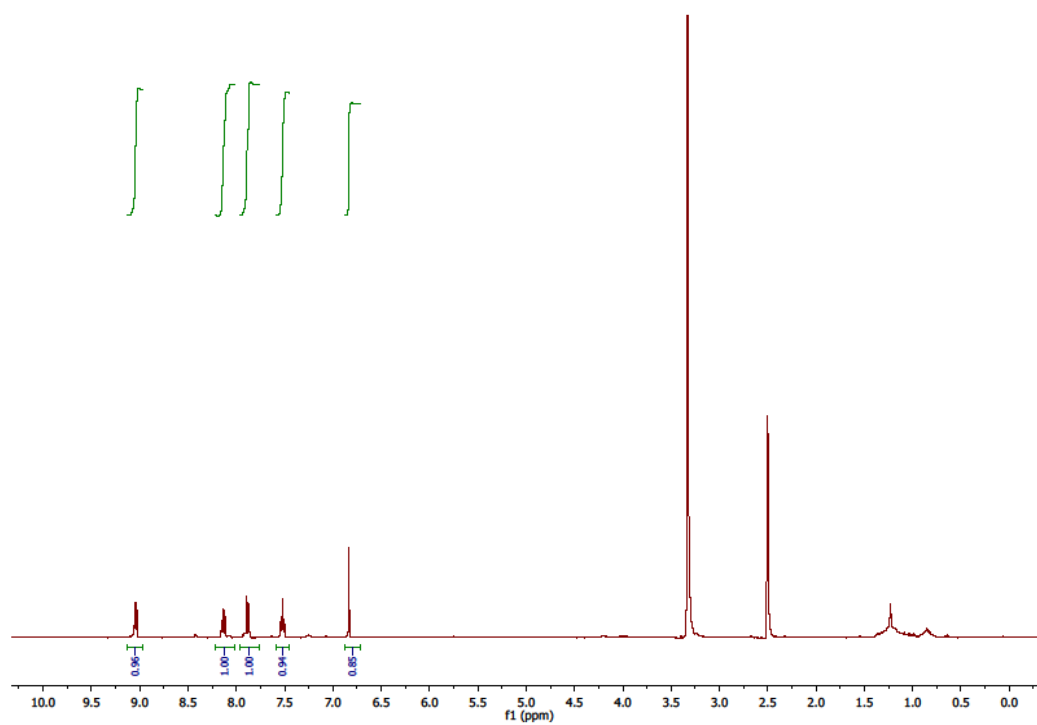

$^{13}\text{C}$  NMR

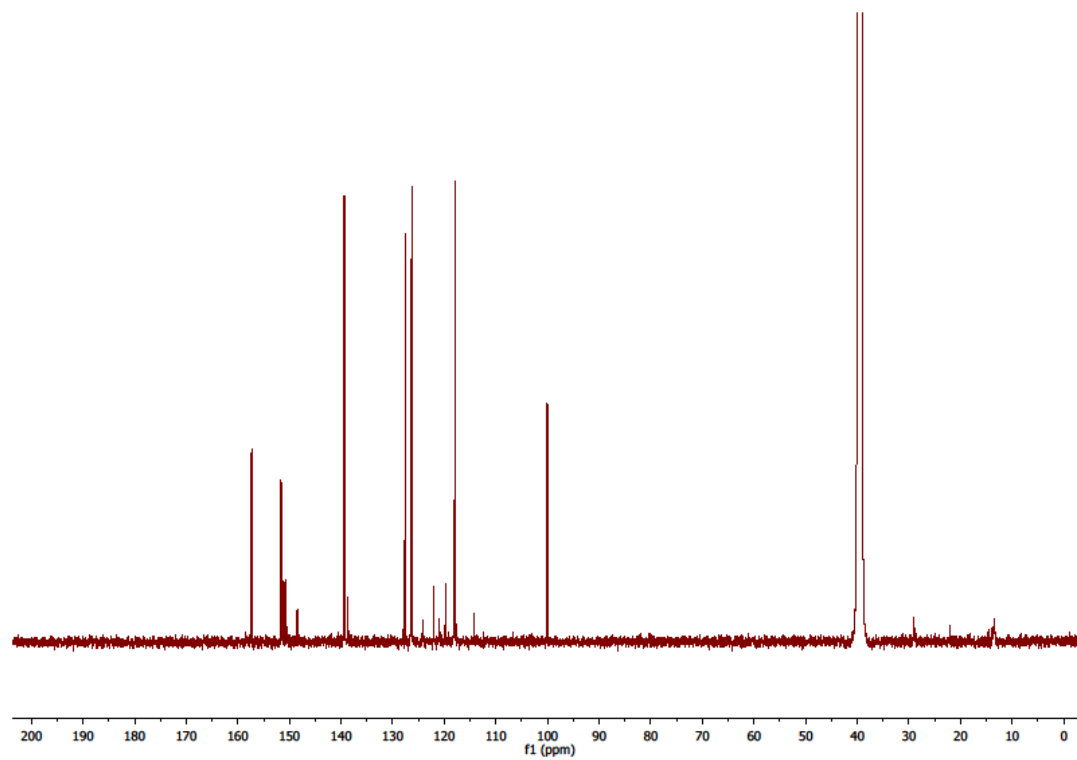

$^{19}\text{F}$  NMR

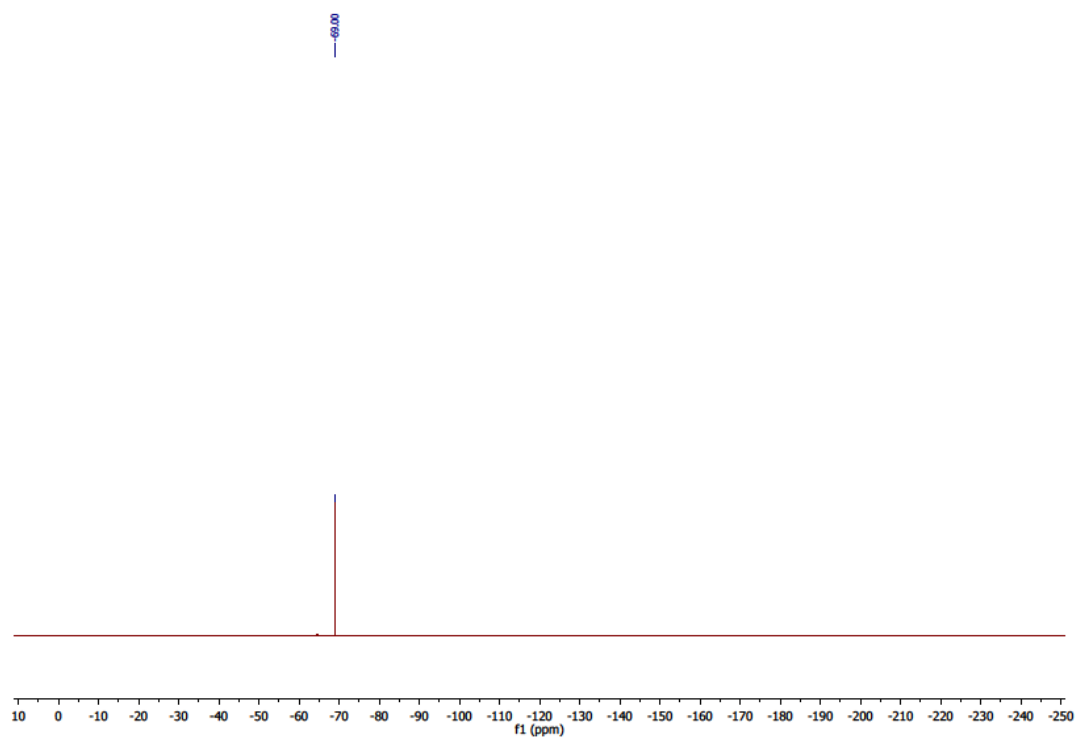

## 4-Methyl-2*H*-pyrido[1,2-*a*]pyrimidin-2-one (**67**)

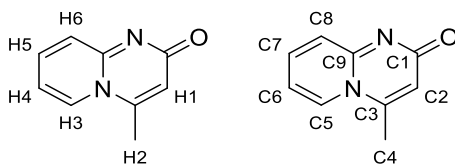

Prepared according to General Method 2 from **25**. The crude product was purified by column chromatography (SiO<sub>2</sub>, 20 g, 93:7 CH<sub>2</sub>Cl<sub>2</sub>: MeOH) to yield a yellow solid (85%). R<sub>f</sub> = 0.26 (9:1 CH<sub>2</sub>Cl<sub>2</sub>: MeOH). Mpt (CH<sub>2</sub>Cl<sub>2</sub>): >195 °C (decomp) (Lit 120-120.5 °C<sup>3</sup>). IR ν<sub>max</sub>/cm<sup>-1</sup> (neat): 1661 (str, C=O), 1645 (med, C=C/C=O), 1595 (str, C=C), 1547 (med, C=C), 1466 (str, C=C). <sup>1</sup>H NMR (500 MHz, CDCl<sub>3</sub>): δ<sub>H</sub> 7.82 (1H, d, *J* = 7.2 Hz, H6), δ<sub>H</sub> 7.54-7.50 (1H, m, H4), δ<sub>H</sub> 7.39-7.35 (1H, m, H3), δ<sub>H</sub> 6.83 (1H, app td, *J* = 7.0, 2.5 Hz, H5), δ<sub>H</sub> 6.49 (1H, d, *J* = 0.6 Hz, H1), δ<sub>H</sub> 2.54 (3H, d, *J* = 0.7 Hz, H2). <sup>13</sup>C NMR (125 MHz, CDCl<sub>3</sub>): δ<sub>C</sub> 168.3 (C1), δ<sub>C</sub> 152.5 (C9), δ<sub>C</sub> 144.4 (C3), δ<sub>C</sub> 135.3 (C7), δ<sub>C</sub> 127.7 (C5), δ<sub>C</sub> 125.8 (C8), δ<sub>C</sub> 116.9 (C2), δ<sub>C</sub> 113.1 (C6), δ<sub>C</sub> 19.1 (C4). HRMS (TOF ES+) *m/z* found [M+H]<sup>+</sup> 161.0708, C<sub>9</sub>H<sub>9</sub>N<sub>2</sub>O<sup>+</sup> required 161.0715, Δ ppm = -0.4 ppm. Data consistent with literature values.<sup>3</sup>

$^1\text{H}$  NMR

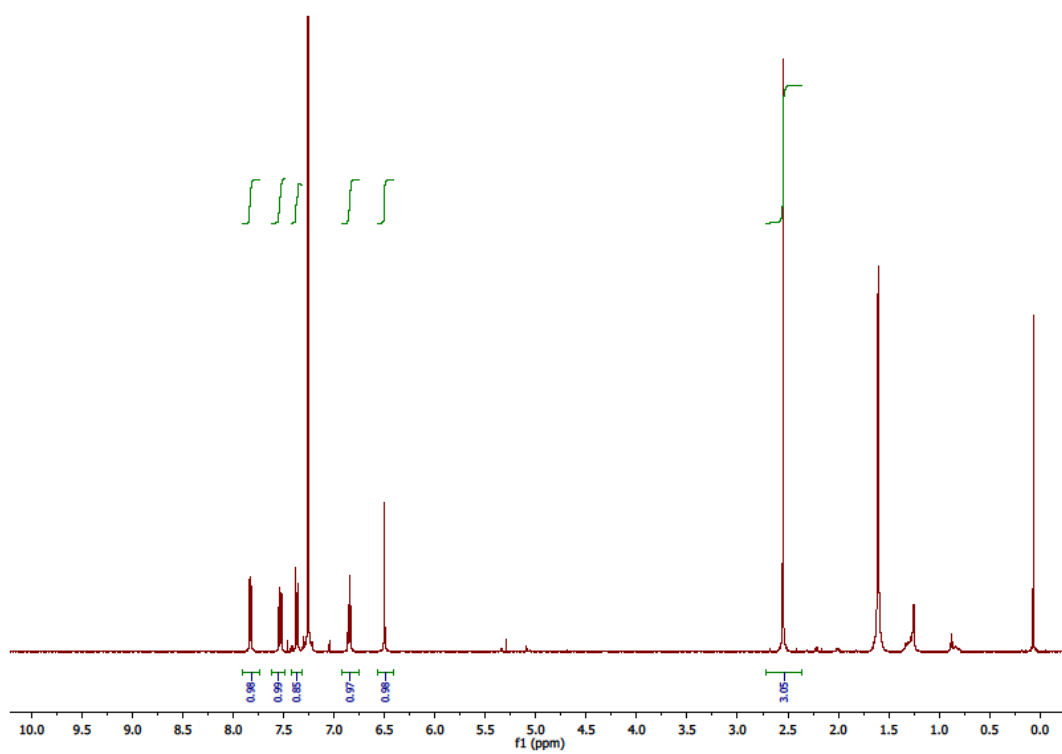

$^{13}\text{C}$  NMR

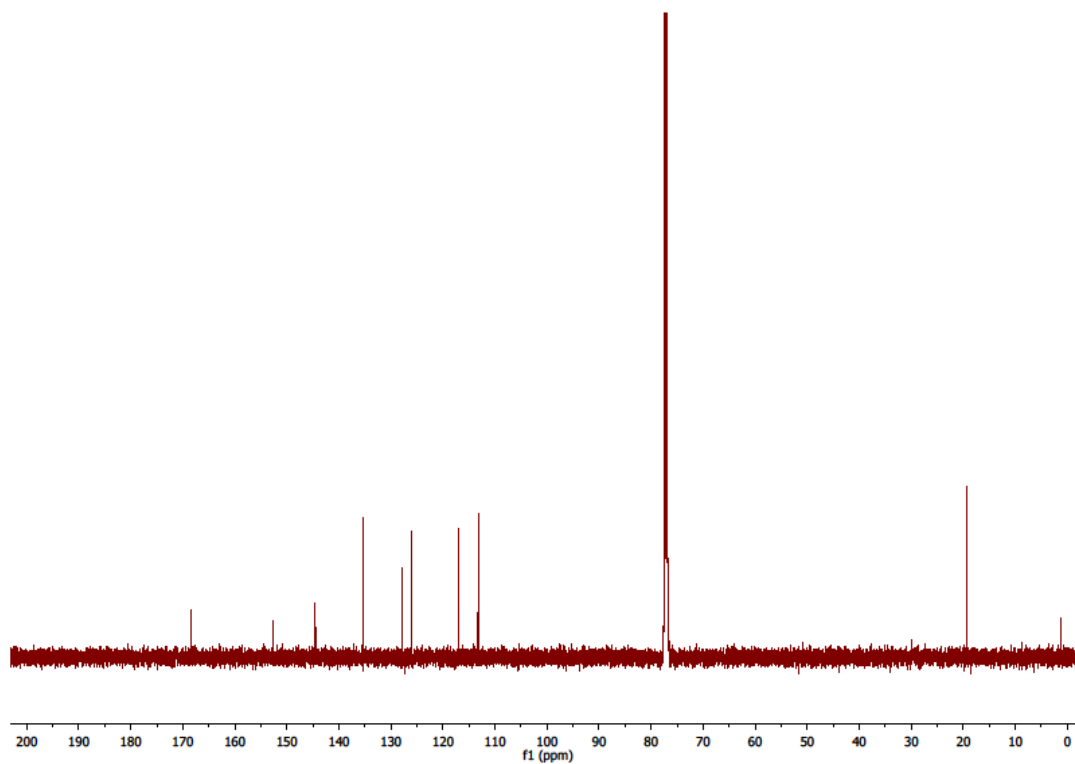

## 4-Methyl-8-(trifluoromethyl)-2*H*-pyrido[1,2-*a*]pyrimidin-2-one (**68**)

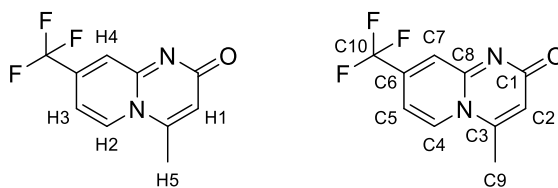

Prepared according to General Method 2 from **43**. The crude product was purified by column chromatography (SiO<sub>2</sub>, 10 g, 100:0, 95:5 then 9:1 CH<sub>2</sub>Cl<sub>2</sub>: MeOH) to yield an ochre solid (quantitative). R<sub>f</sub> = 0.23 (9:1 CH<sub>2</sub>Cl<sub>2</sub>: MeOH). Mpt (CH<sub>2</sub>Cl<sub>2</sub>): darkens >200 °C, melts 274-275 °C. IR ν<sub>max</sub>/cm<sup>-1</sup> (neat): 3063 (w, C-H), 1653 (str, C=O), 1614 (str, C=C), 1553 (w, C=C), 1474 (str, C=C/C=N), 1445 (med), 1392 (med), 1359 (str), 1301 (str, C-O), 1287 (str), 1243 (med), 1175 (med), 1159 (str), 1129 (str), 1077 (str), 1050 (w), 1026 (str). <sup>1</sup>H NMR (500 MHz, d<sup>6</sup>-DMSO): δ<sub>H</sub> 8.40 (1H, d, *J* = 7.5 Hz, H2), δ<sub>H</sub> 7.58-7.55 (1H, m, H4), δ<sub>H</sub> 7.17 (1H, dd, *J* = 7.5, 2.2 Hz, H3), δ<sub>H</sub> 6.48 (1H, d, *J* = 0.6 Hz, H1), δ<sub>H</sub> 2.55 (3H, d, *J* = 0.5 Hz, H5). <sup>13</sup>C NMR (125 MHz, d<sup>6</sup>-DMSO): δ<sub>C</sub> 167.2 (C1), δ<sub>C</sub> 151.2 (C8), δ<sub>C</sub> 147.2 (C3), δ<sub>C</sub> 135.2 (q, <sup>2</sup>J<sub>C-F</sub> = 34 Hz, C6), δ<sub>C</sub> 133.2 (C4), δ<sub>C</sub> 122.1 (q, <sup>1</sup>J<sub>C-F</sub> = 273.6 Hz, C10), δ<sub>C</sub> 121.8 (d, <sup>3</sup>J<sub>C-F</sub> = 4.6 Hz, C7), δ<sub>C</sub> 116.0 (C2), δ<sub>C</sub> 106.8 (d, <sup>3</sup>J<sub>C-F</sub> = 1.5 Hz, C5), δ<sub>C</sub> 18.5 (C9). <sup>19</sup>F NMR (376 MHz, d<sup>6</sup>-DMSO): δ<sub>F</sub> -65.72 (CF<sub>3</sub>). HRMS (FTMS ESI+) *m/z* found [M+H]<sup>+</sup> 229.0576, C<sub>10</sub>H<sub>8</sub>ON<sub>2</sub>F<sub>3</sub><sup>+</sup> required 229.0583, Δ ppm = -3.3 ppm.

$^1\text{H}$  NMR

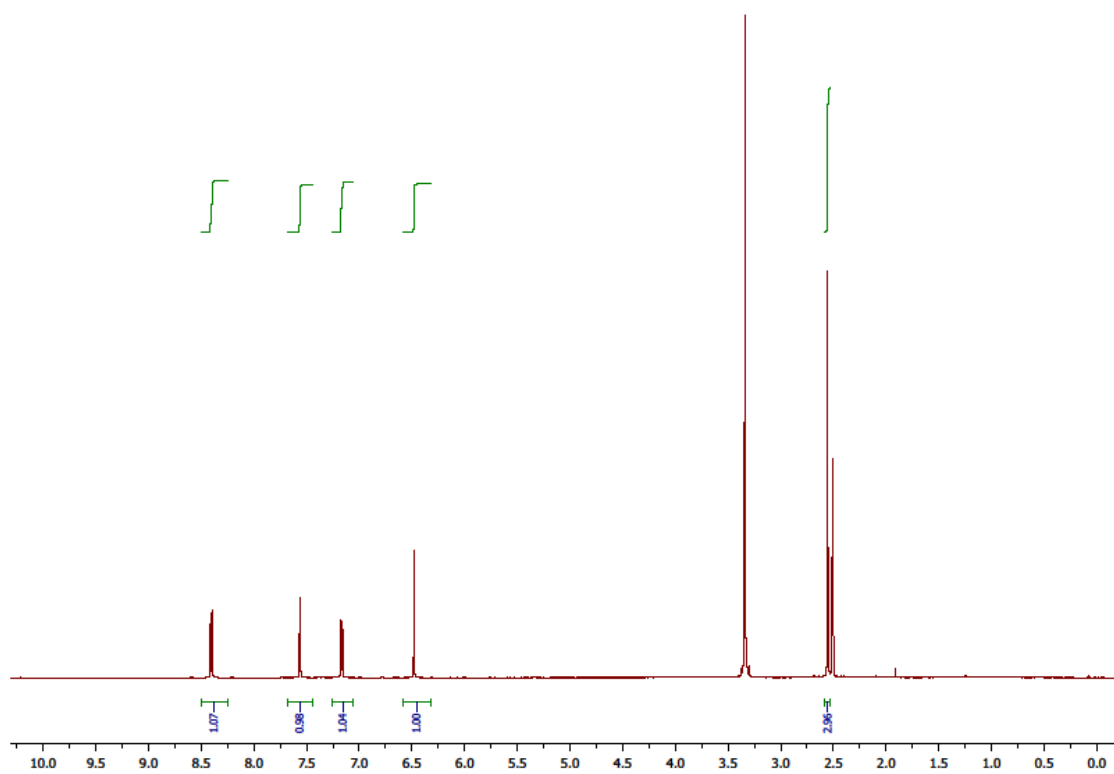

$^{13}\text{C}$  NMR

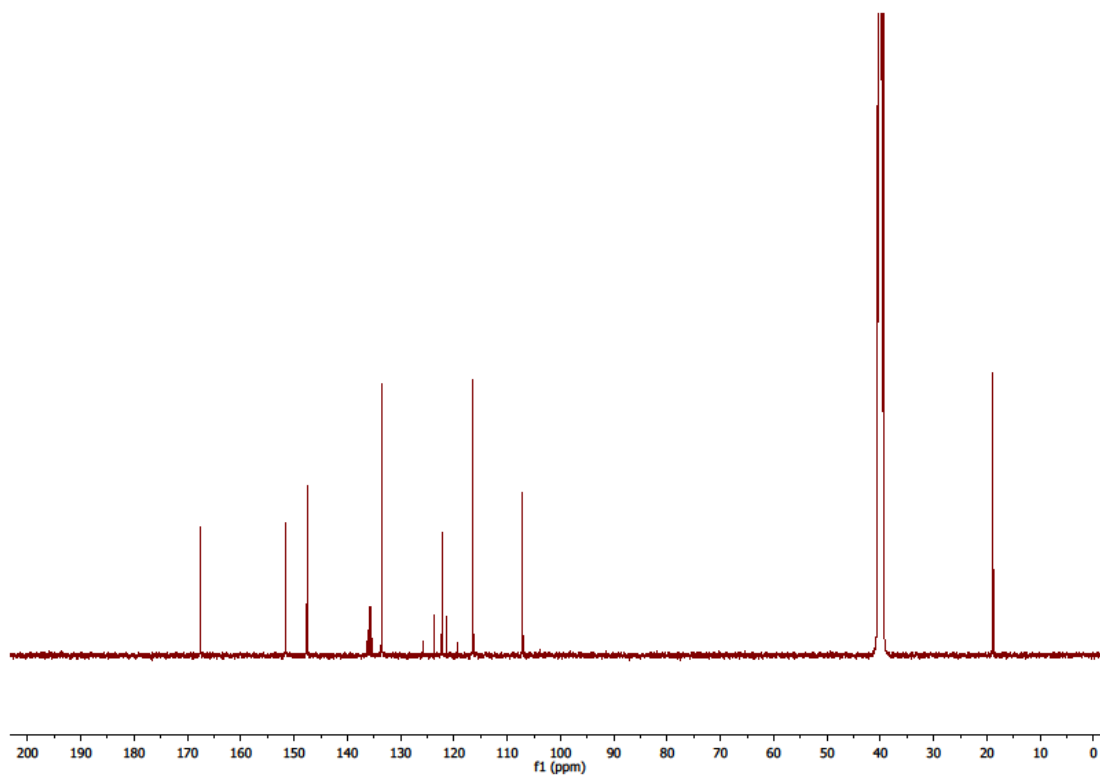



$^{19}\text{F}$  NMR

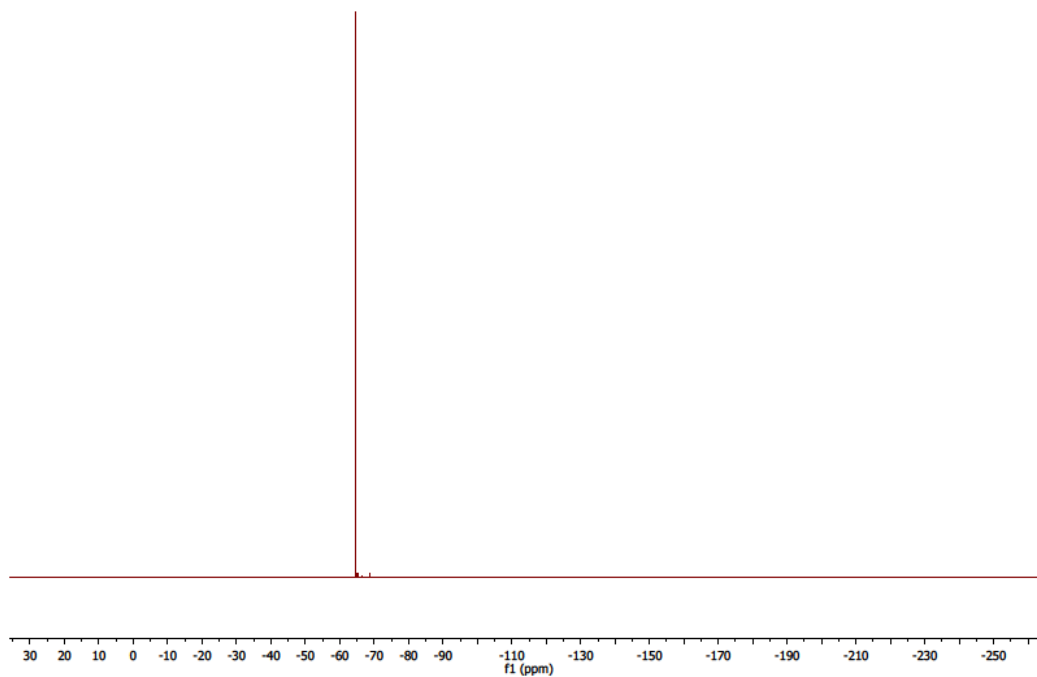

## 8-Ethyl-4-methyl-2H-pyrido[1,2-a]pyrimidin-2-one (**69**)

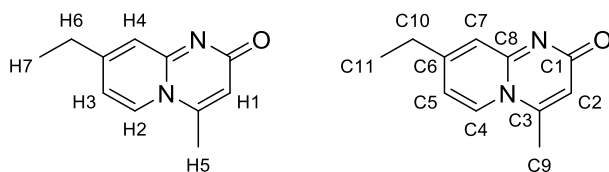

Prepared according to General Method 2 from **44**. The crude product was purified by column chromatography (SiO<sub>2</sub>, 30 g, 19:1 CH<sub>2</sub>Cl<sub>2</sub>: MeOH) to yield a yellow wax (quantitative). R<sub>f</sub> = 0.57 (9:1 CH<sub>2</sub>Cl<sub>2</sub>: MeOH). IR ν<sub>max</sub>/cm<sup>-1</sup> (neat): 3494 (w, br), 3082 (w, C-H), 1642 (str, C=O), 1591 (str, C=C), 1546 (w), 1479 (w), 1456 (str, C=C/C=N), 1440 (str), 1389 (str), 1365 (med), 1315 (w), 1283 (str), 1250 (med), 1200 (med), 1165 (med), 1138 (w), 1062 (w), 1051 (w), 1034 (w), 1006 (w). <sup>1</sup>H NMR (500 MHz, d<sup>6</sup>-DMSO): δ<sub>H</sub> 8.14 (1H, d, *J* = 7.3 Hz, H2), δ<sub>H</sub> 6.97-6.96 (1H, m, H4), δ<sub>H</sub> 6.89 (1H, dd, *J* = 7.3, 2.0 Hz, H3), δ<sub>H</sub> 6.31 (1H, d, *J* = 0.8 Hz, H1), δ<sub>H</sub> 2.65 (2H, dq, *J* = 0.6, 7.5 Hz, H6), δ<sub>H</sub> 2.50 (3H, d, *J* = 0.8 Hz, H5), δ<sub>H</sub> 1.20 (3H, t, *J* = 7.5 Hz, H7). <sup>13</sup>C NMR (125 MHz, d<sup>6</sup>-DMSO): δ<sub>C</sub> 167.5 (C1), δ<sub>C</sub> 153.3 (C6), δ<sub>C</sub> 152.1 (C8), δ<sub>C</sub> 145.8 (C3), δ<sub>C</sub> 129.9 (C4), δ<sub>C</sub> 119.9 (C7), δ<sub>C</sub> 115.0 (C2), δ<sub>C</sub> 114.1 (C5), δ<sub>C</sub> 27.4 (C10), δ<sub>C</sub> 18.4 (C9), δ<sub>C</sub> 13.4 (C11). HRMS (TOF ES+) *m/z* found [M+H]<sup>+</sup> 189.1019, C<sub>11</sub>H<sub>13</sub>ON<sub>2</sub><sup>+</sup> required 189.1028, Δ ppm = -4.8 ppm.

$^1\text{H}$  NMR

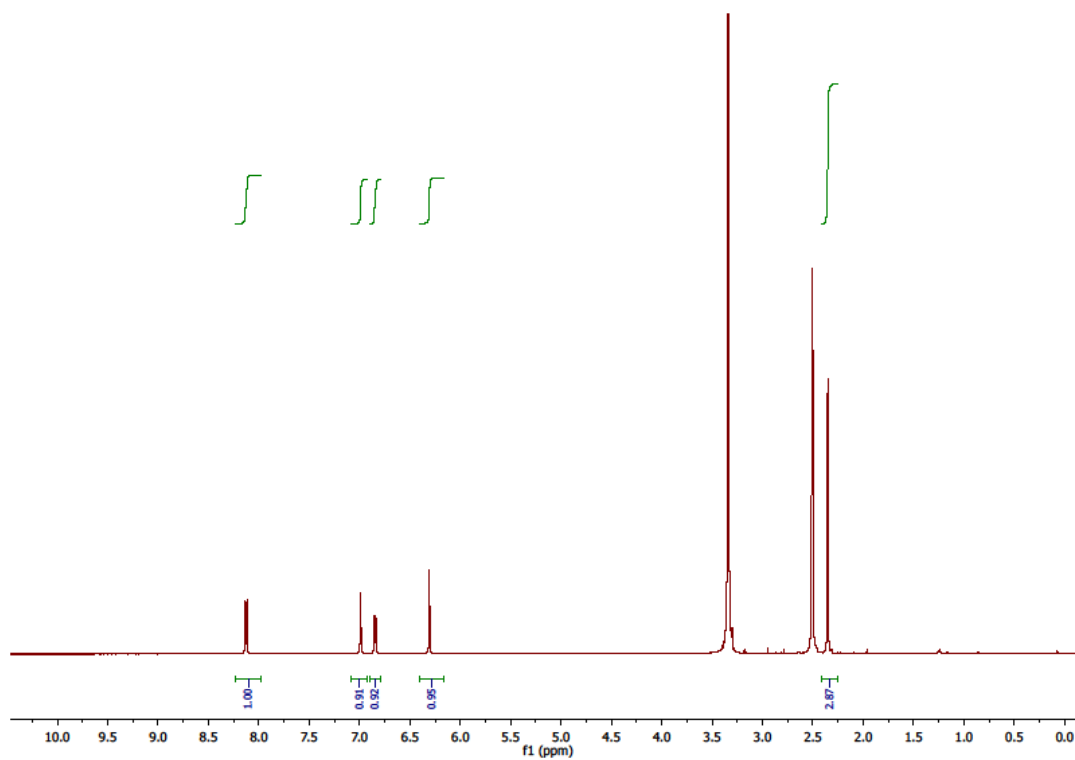

$^{13}\text{C}$  NMR

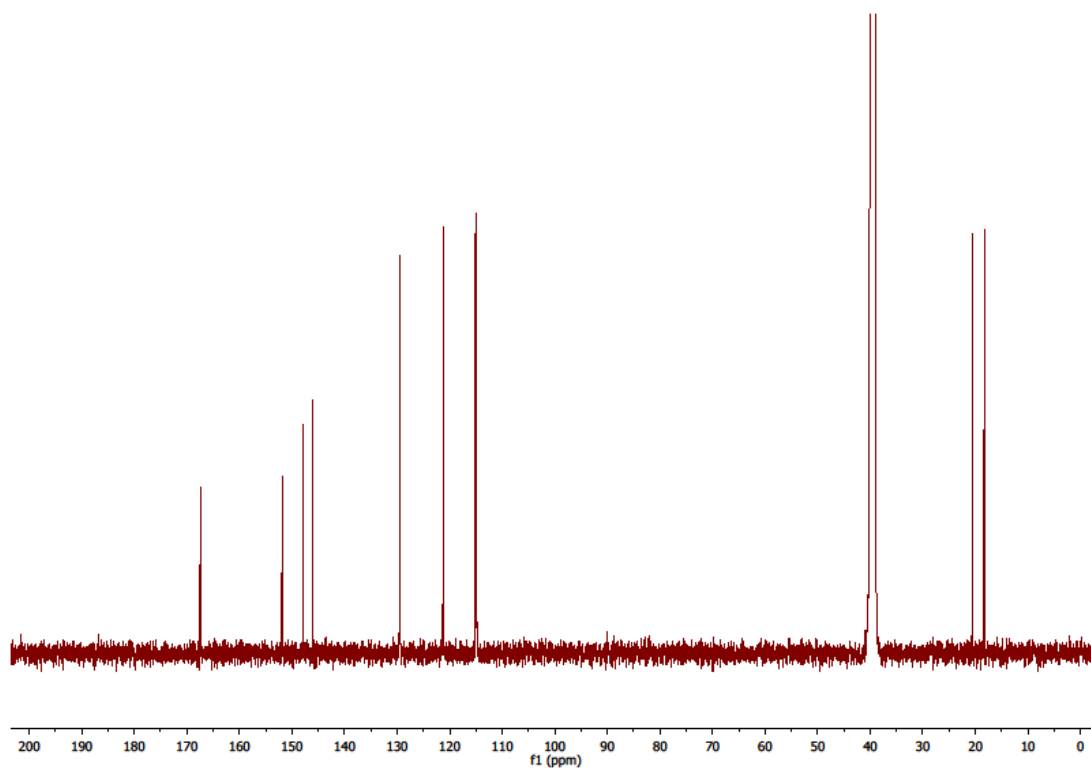

## 8-Bromo-4-methyl-2*H*-pyrido[1,2-*a*]pyrimidin-2-one (70)

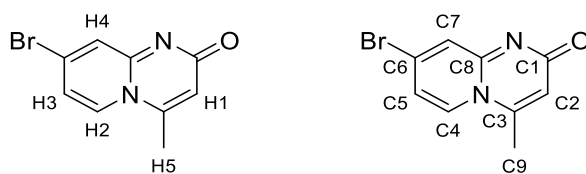

Prepared according to General Method 2 from **45**. The crude product was purified by column chromatography (SiO<sub>2</sub>, 30 g, 1:0, 97:3, then 19:1 CH<sub>2</sub>Cl<sub>2</sub>: MeOH) to yield a brown wax (0.09g, 89% purity with **45** and methanol, 1.33 mmol, 19%). Further purification by preparative HPLC yielded spectroscopically pure material. R<sub>f</sub> = 0.42 (9:1 CH<sub>2</sub>Cl<sub>2</sub>: MeOH). IR ν<sub>max</sub>/cm<sup>-1</sup> (neat): 3360 (w, br), 3045 (w, C-H), 3001 (w, C-H), 1724 (med), 1652 (str, C=O), 1574 (str, C=C), 1534 (w, C=C), 1456 (str, C=C/C=N), 1372 (str), 1354 (str), 1311 (w), 1285 (str), 1257 (w), 1193 (med), 1164 (w), 1104 (w), 1078 (w), 1057 (w), 1024 (med). <sup>1</sup>H NMR (500 MHz, d<sup>6</sup>-DMSO): δ<sub>H</sub> 8.12 (1H, d, *J* = 7.6 Hz, H2), δ<sub>H</sub> 7.45 (1H, d, *J* = 2.2 Hz, H4), δ<sub>H</sub> 7.11 (1H, dd, *J* = 7.6, 2.3 Hz, H3), δ<sub>H</sub> 6.36 (1H, s, H1), H5 obscured by DMSO signal. <sup>13</sup>C NMR (125 MHz, d<sup>6</sup>-DMSO): δ<sub>C</sub> 167.2 (C1), δ<sub>C</sub> 151.8 (C8), δ<sub>C</sub> 146.7 (C3), δ<sub>C</sub> 131.6 (C4), δ<sub>C</sub> 130.9 (C6), δ<sub>C</sub> 124.9 (C7), δ<sub>C</sub> 115.8 (C5), δ<sub>C</sub> 115.4 (C2), δ<sub>C</sub> 18.4 (C9). HRMS (FTMS ESI+) *m/z* found [M+H]<sup>+</sup> 238.9805, C<sub>9</sub>H<sub>8</sub>ON<sub>2</sub><sup>79</sup>Br<sup>+</sup> required 238.9815, Δ ppm = -4.1 ppm.

# $^1\text{H}$ NMR

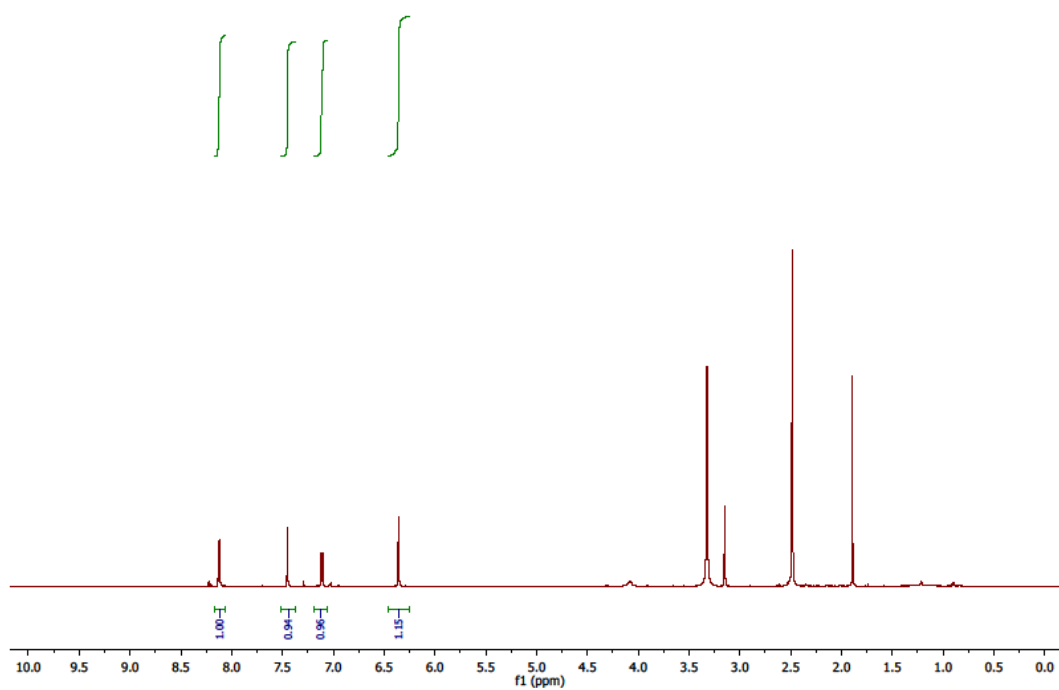

# $^{13}\text{C}$ NMR

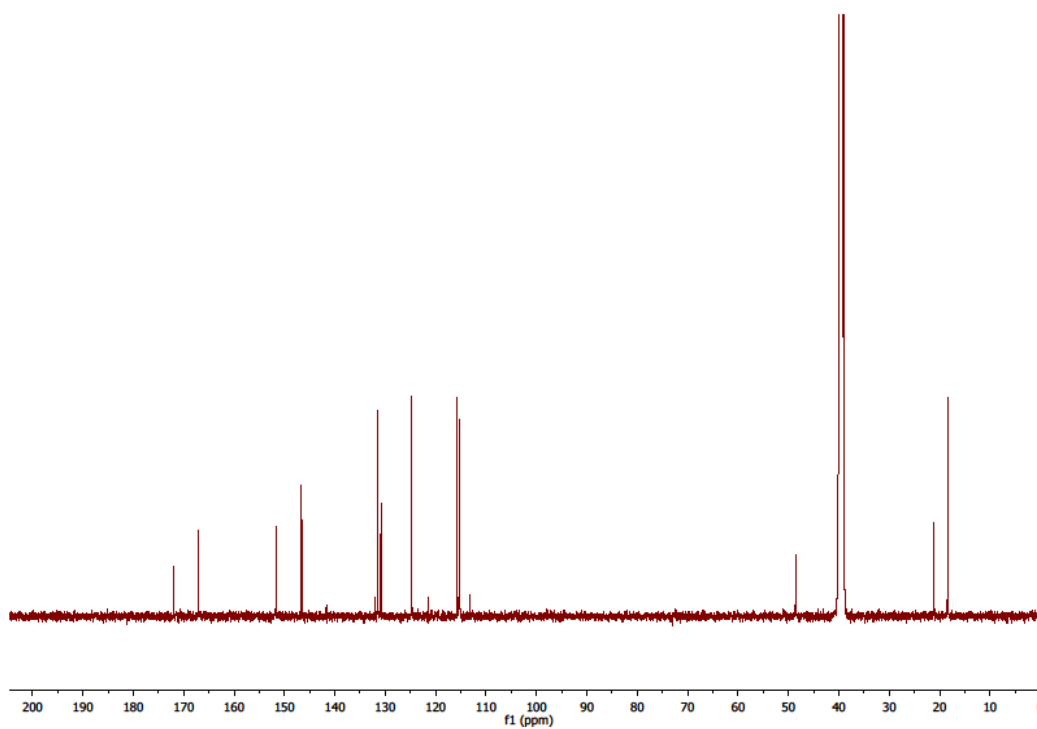



## 4-Methyl-2-oxo-2*H*-pyrido[1,2-*a*]pyrimidine-8-carbonitrile (**71**)

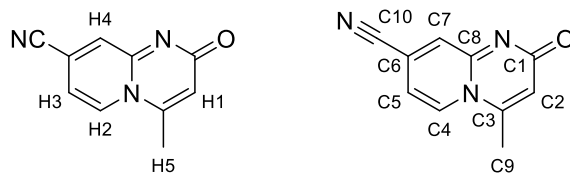

Prepared according to General Method 2 from **46**. The crude product was purified by column chromatography (SiO<sub>2</sub>, 30 g, 19:1 CH<sub>2</sub>Cl<sub>2</sub>: MeOH) to yield a yellow wax (61%). R<sub>f</sub> = 0.46 (9:1 CH<sub>2</sub>Cl<sub>2</sub>: MeOH). Mpt (CH<sub>2</sub>Cl<sub>2</sub>): phase change >240 °C, melts 299-301 °C. IR ν<sub>max</sub>/cm<sup>-1</sup> (neat): 3068 (w, C-H), 3040 (w, C-H), 2926 (w, C-H), 2237 (w, C≡C), 1685 (w), 1655 (med), 1642 (med, C=O), 1598 (str, C=C), 1532 (w), 1466 (str, C=N/C=C), 1399 (med), 1366 (med), 1291 (med), 1251 (w), 1206 (med), 1170 (w), 1064 (str), 1031 (med). <sup>1</sup>H NMR (500 MHz, d<sup>6</sup>-DMSO): δ<sub>H</sub> 8.35 (1H, d, *J* = 7.1 Hz, H2), δ<sub>H</sub> 7.85 (1H, app dd, *J* = 2.0, 0.7 Hz, H4), δ<sub>H</sub> 7.20 (1H, dd, *J* = 7.4, 2.0 Hz, H3), δ<sub>H</sub> 6.46 (1H, d, *J* = 0.8 Hz, H1), δ<sub>H</sub> 2.52 (3H, d, *J* = 0.7 Hz, H5). <sup>13</sup>C NMR (125 MHz, d<sup>6</sup>-DMSO): δ<sub>C</sub> 167.1 (C1), δ<sub>C</sub> 150.8 (C8), δ<sub>C</sub> 147.3 (C3), δ<sub>C</sub> 132.4 (C4), δ<sub>C</sub> 130.8 (C7), δ<sub>C</sub> 118.9 (C6), δ<sub>C</sub> 116.1 (C2), δ<sub>C</sub> 116.0 (C10), δ<sub>C</sub> 111.1 (C5), δ<sub>C</sub> 18.4 (C9). HRMS (FTMS ESI+) *m/z* found [M+H]<sup>+</sup> 186.0656, C<sub>10</sub>H<sub>8</sub>ON<sub>3</sub><sup>+</sup> required 186.0662, Δ ppm = -3.2 ppm.

$^1\text{H}$  NMR

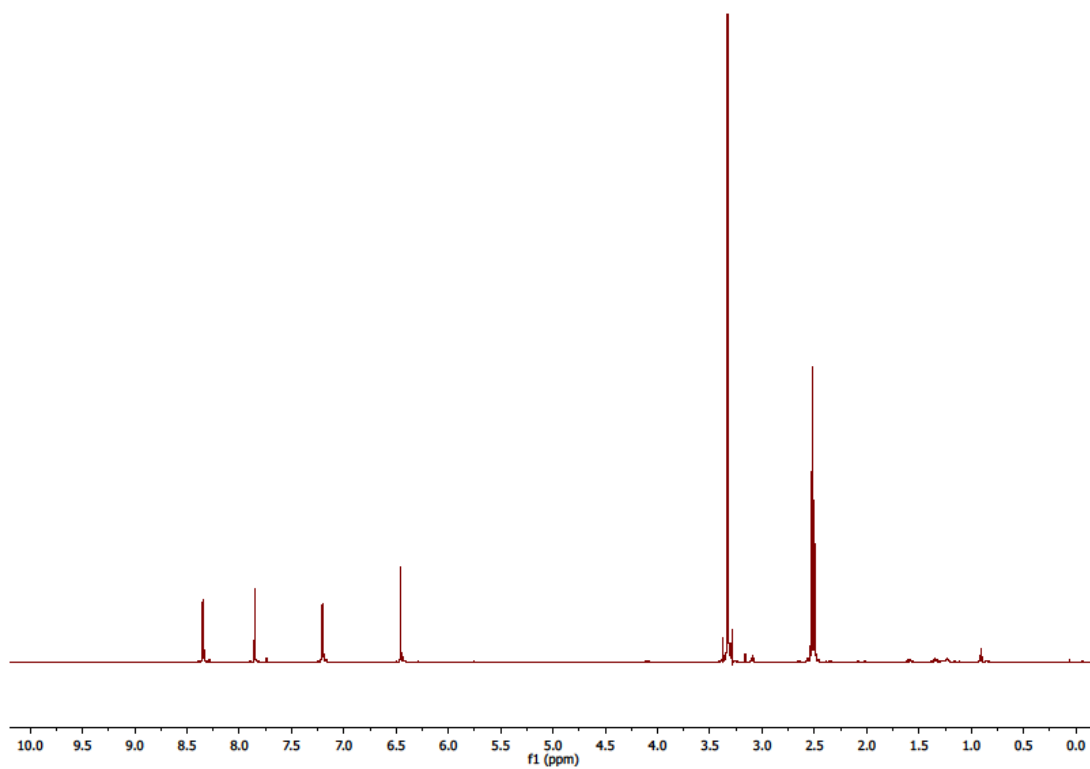

$^{13}\text{C}$  NMR

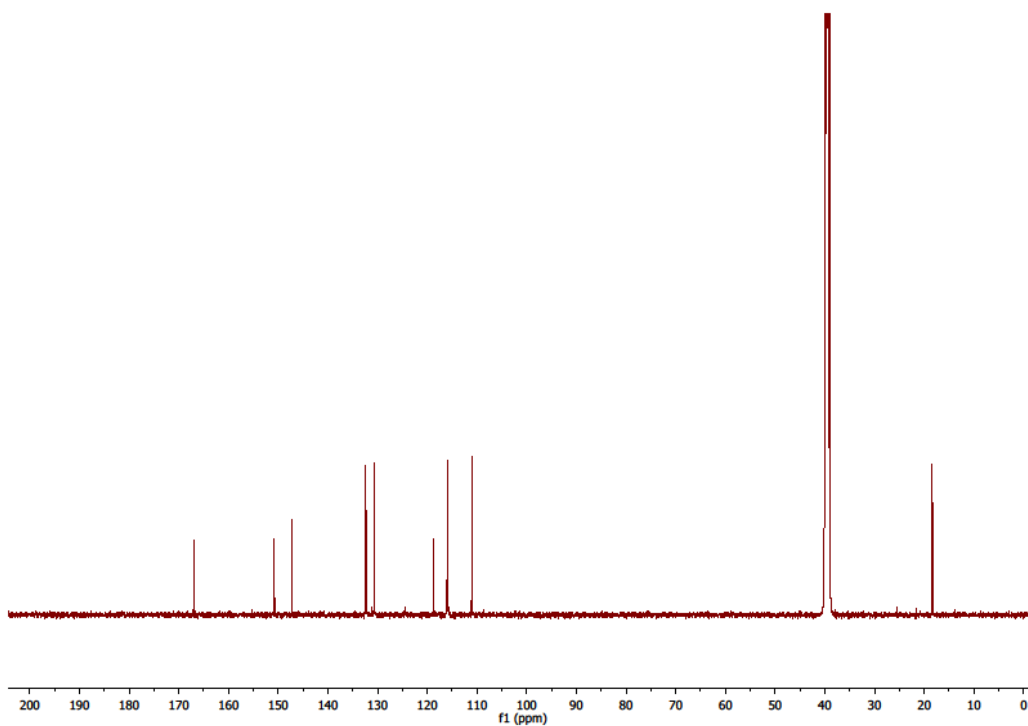



## 8-Chloro-4-methyl-2*H*-pyrido[1,2-*a*]pyrimidin-2-one (72)

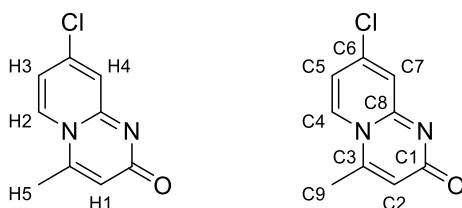

Prepared according to General Method 2 from **47**. The crude product was purified by Combiflash Companion (SiO<sub>2</sub>, 12 g, 0-10% MeOH in CH<sub>2</sub>Cl<sub>2</sub>) to yield a pink solid (5.44 g, 87% purity, 24.33 mmol, 80%). Further purification by preparative HPLC yielded spectroscopically pure material.  $R_f = 0.23$  (9:1 CH<sub>2</sub>Cl<sub>2</sub>: MeOH). Mpt (CH<sub>2</sub>Cl<sub>2</sub>/MeOH): phase change >165 °C, melts >300 °C. IR  $\nu_{\max}/\text{cm}^{-1}$  (neat): 3072 (w, C-H), 1640 (str, C=O), 1601 (str, C=C), 1540 (w), 1520 (w), 1464 (str, C=C/C=N), 1391 (str), 1372 (med), 1286 (str), 1251 (w), 1193 (med), 1166 (w), 1089 (w), 1065 (w), 1026 (w). <sup>1</sup>H NMR (400 MHz, d<sup>6</sup>-DMSO):  $\delta_{\text{H}}$  8.23 (1H, d,  $J = 7.7$  Hz, H2),  $\delta_{\text{H}}$  7.30 (1H, d,  $J = 2.3$  Hz, H4),  $\delta_{\text{H}}$  7.03 (1H, dd,  $J = 7.6, 2.4$  Hz, H3),  $\delta_{\text{H}}$  6.36 (1H, s, H1), H5 obscured by DMSO signal. <sup>13</sup>C NMR (100 MHz, d<sup>6</sup>-DMSO):  $\delta_{\text{C}}$  167.0 (C1),  $\delta_{\text{C}}$  151.7 (C8),  $\delta_{\text{C}}$  146.4 (C3),  $\delta_{\text{C}}$  141.6 (C6),  $\delta_{\text{C}}$  131.9 (C4),  $\delta_{\text{C}}$  121.3 (C7),  $\delta_{\text{C}}$  115.1 (C2),  $\delta_{\text{C}}$  113.2 (C5),  $\delta_{\text{C}}$  18.3 (C9). HRMS (TOF ES+)  $m/z$  found [M+H]<sup>+</sup> 195.0333, C<sub>9</sub>H<sub>8</sub>N<sub>2</sub>O<sup>35</sup>Cl<sup>+</sup> required 195.0325,  $\Delta$  ppm = 4.1 ppm.

72\_PROTON.010.esp

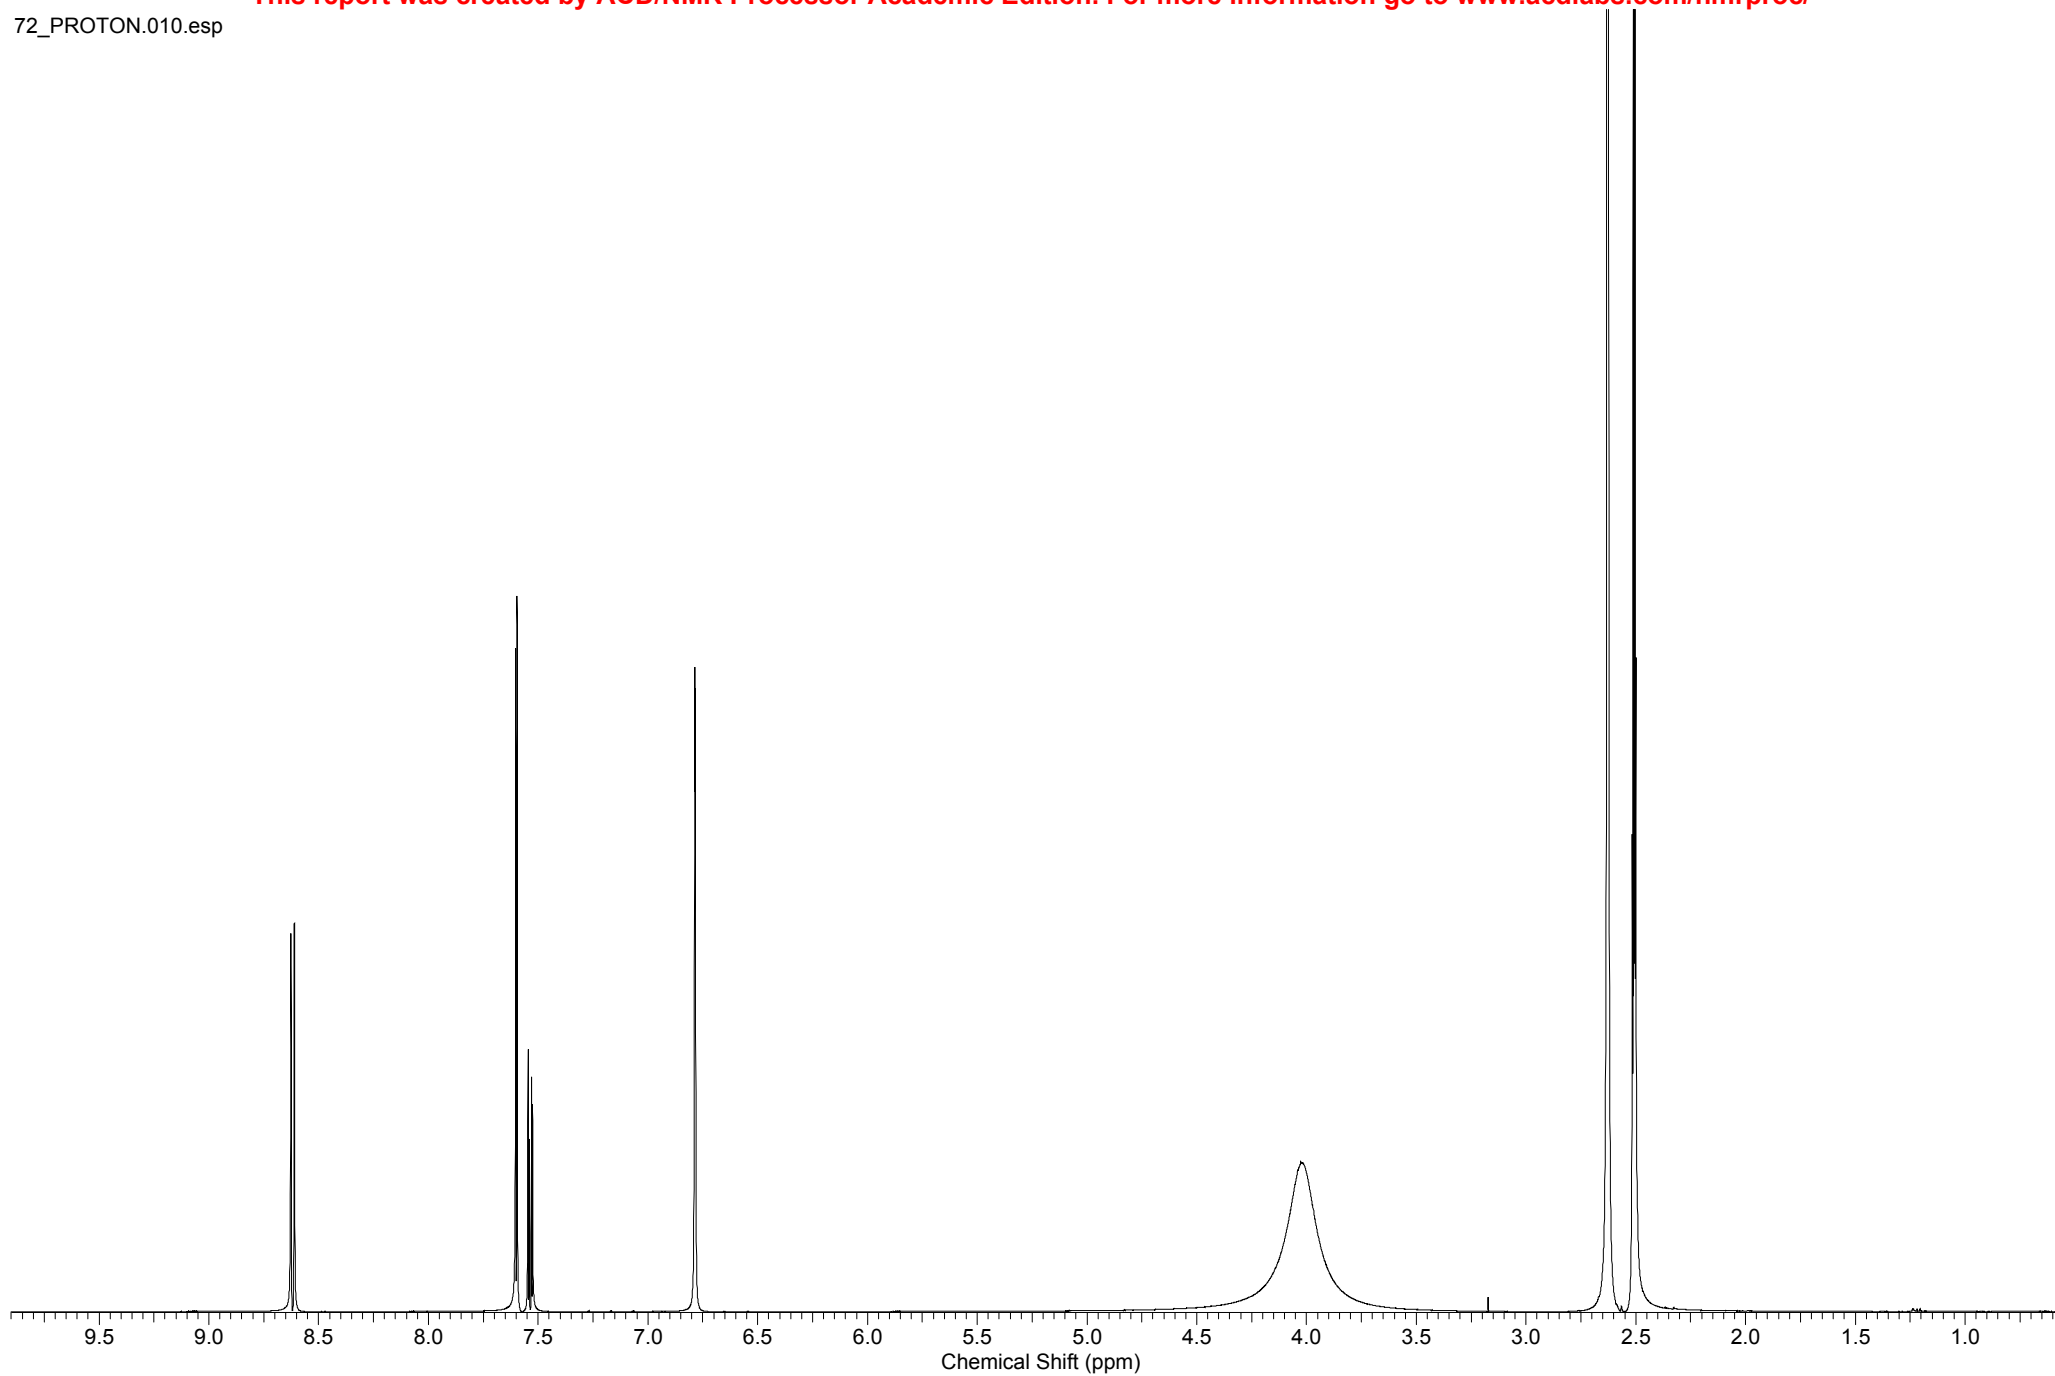

$^{13}\text{C}$  NMR

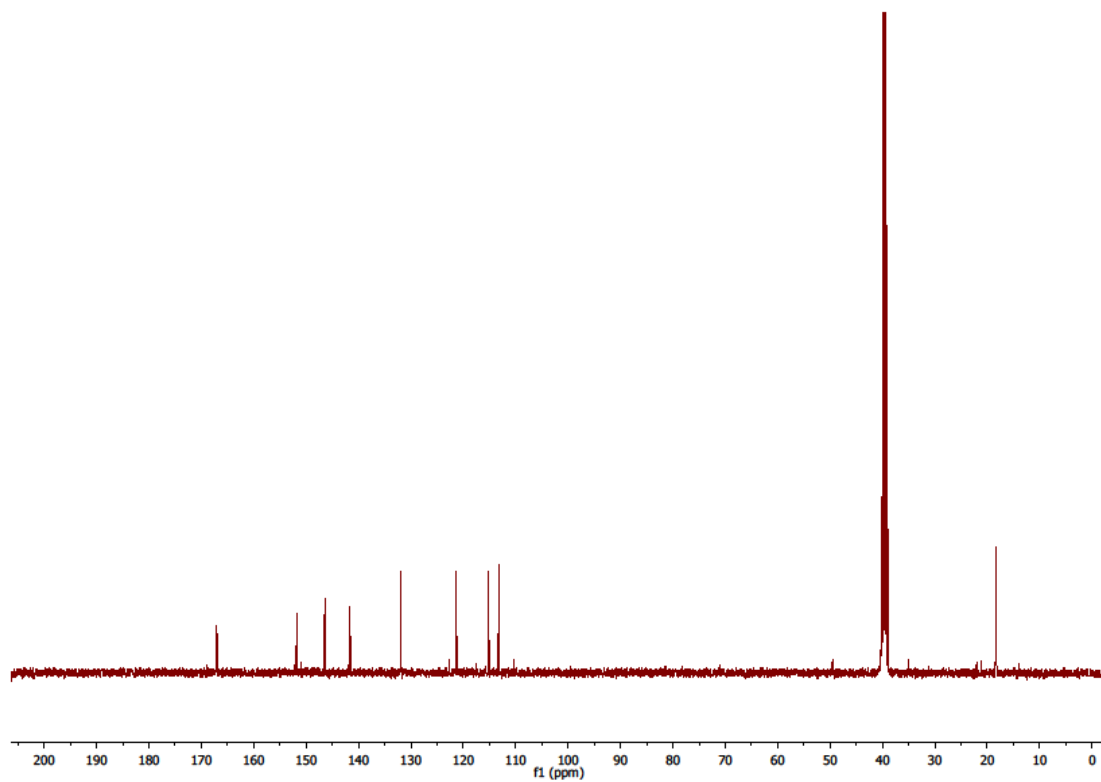

### 4,8-Dimethyl-2*H*-pyrido[1,2-*a*]pyrimidin-2-one (**73**)

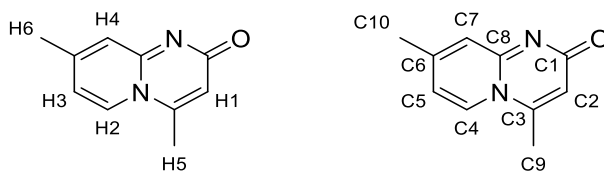

Prepared according to General Method 2 from **18**. The crude product was purified by Combiflash Companion (SiO<sub>2</sub>, 24 g, 0-10% MeOH/CH<sub>2</sub>Cl<sub>2</sub>) to yield a white solid (53%). R<sub>f</sub> = 0.26 (9:1 CH<sub>2</sub>Cl<sub>2</sub>: MeOH). Mpt (CH<sub>2</sub>Cl<sub>2</sub>): phase change >180 °C, melts 230-232 °C. IR  $\nu_{\text{max}}/\text{cm}^{-1}$  (neat): 3233 (w, br, C-H), 3045 (w, C-H), 2955 (w, C-H), 1646 (str, C=O), 1592 (str, C=C), 1543 (w), 1466 (str, C=N/C=C), 1395 (str, C=C/C=N), 1372 (str), 1292 (med), 1253 (med), 1206 (med), 1175 (w), 1067 (str), 1043 (w). <sup>1</sup>H NMR (500 MHz, d<sup>6</sup>-DMSO):  $\delta_{\text{H}}$  8.10 (1H, d, *J* = 7.3 Hz, H2),  $\delta_{\text{H}}$  6.97 (1H, s, H4),  $\delta_{\text{H}}$  6.82 (1H, dd, *J* = 7.3, 1.9 Hz, H3),  $\delta_{\text{H}}$  6.28 (1H, s, H1),  $\delta_{\text{H}}$  2.33 (3H, s, H6). H5 obscured by DMSO signal. <sup>13</sup>C NMR (125 MHz, d<sup>6</sup>-DMSO):  $\delta_{\text{C}}$  167.5 (C1),  $\delta_{\text{C}}$  152.0 (C8),  $\delta_{\text{C}}$  148.0 (C6),  $\delta_{\text{C}}$  146.1 (C3),  $\delta_{\text{C}}$  129.6 (C4),  $\delta_{\text{C}}$  121.3 (C7),  $\delta_{\text{C}}$  115.2 (C2 or C5),  $\delta_{\text{C}}$  115.0 (C2 or C5),  $\delta_{\text{C}}$  20.7 (C10),  $\delta_{\text{C}}$  18.4 (C9). HRMS (FTMS ESI+) *m/z* found [M+H]<sup>+</sup> 175.0861, C<sub>10</sub>H<sub>11</sub>ON<sub>2</sub><sup>+</sup> required 175.0866,  $\Delta$  ppm = -2.6 ppm.

$^1\text{H}$  NMR

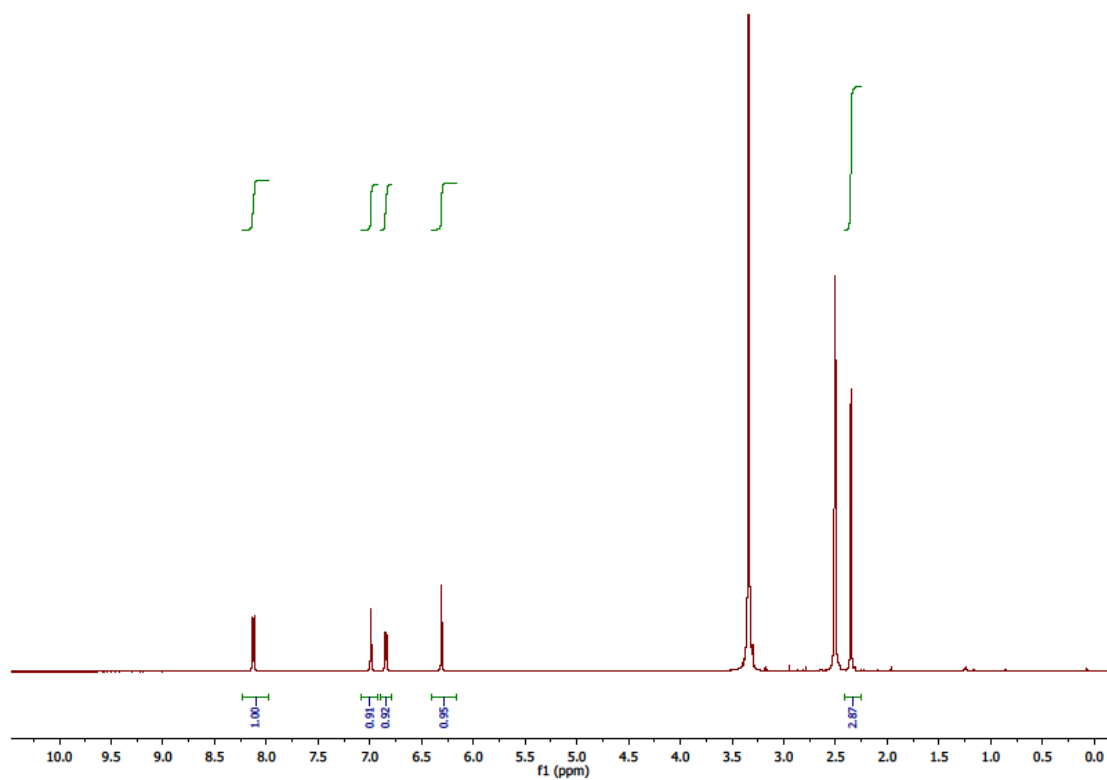

$^{13}\text{C}$  NMR

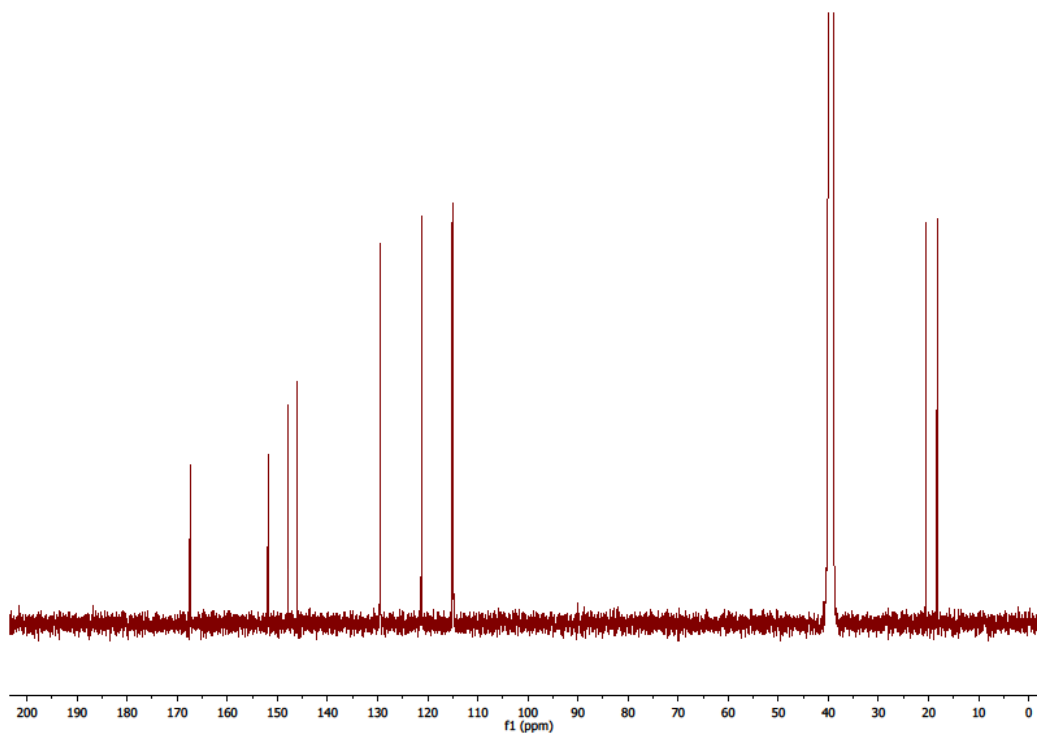

## 4-Methyl-8-phenyl-2H-pyrido[1,2-a]pyrimidin-2-one (74)

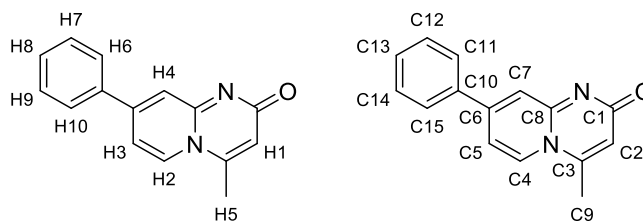

Prepared according to General Method 2 from **49**. The crude product was purified by column chromatography (SiO<sub>2</sub>, 30 g, 19:1 CH<sub>2</sub>Cl<sub>2</sub>: MeOH) to yield a beige solid (94%). R<sub>f</sub> = 0.49 (9:1 CH<sub>2</sub>Cl<sub>2</sub>: MeOH). Mpt (CH<sub>2</sub>Cl<sub>2</sub>): 189-192 °C. IR ν<sub>max</sub>/cm<sup>-1</sup> (neat): 3062 (w, br, C-H), 2923 (w, C-H), 2853 (w, C-H), 1708 (w), 1639 (str, C=O), 1576 (med, C=C), 1505 (w), 1449 (w), 1435 (w), 1393 (med), 1370 (med), 1256 (med), 1238 (med), 1191 (med), 1175 (med), 1073 (w), 1032 (w), 1017 (w). <sup>1</sup>H NMR (500 MHz, d<sup>6</sup>-DMSO): δ<sub>H</sub> 8.50 (1H, d, *J* = 7.5 Hz, H2), δ<sub>H</sub> 7.95-7.88 (2H, m, H6+H10), δ<sub>H</sub> 7.60-7.52 (3H, m, H7+H8+H9), δ<sub>H</sub> 7.49 (1H, d, *J* = 2.0 Hz, H4), δ<sub>H</sub> 7.37 (1H, dd, *J* = 7.5, 2.2 Hz, H3), δ<sub>H</sub> 6.37 (1H, d, *J* = 0.8 Hz, H1), δ<sub>H</sub> 2.56 (3H, d, *J* = 0.5 Hz, H5). <sup>13</sup>C NMR (125 MHz, d<sup>6</sup>-DMSO): δ<sub>C</sub> 167.4 (C1), δ<sub>C</sub> 152.3 (C8), δ<sub>C</sub> 146.6 (C6), δ<sub>C</sub> 146.2 (C3), δ<sub>C</sub> 135.2 (C10), δ<sub>C</sub> 130.7 (C4), δ<sub>C</sub> 130.2 (C13), δ<sub>C</sub> 129.3 (C12+C14), δ<sub>C</sub> 127.0 (C11+C15), δ<sub>C</sub> 118.9 (C7), δ<sub>C</sub> 115.2 (C2), δ<sub>C</sub> 111.2 (C5), δ<sub>C</sub> 18.3 (C9). HRMS (TOF ES+) *m/z* found [M+H]<sup>+</sup> 237.1019, C<sub>15</sub>H<sub>13</sub>ON<sub>2</sub><sup>+</sup> required 237.1028, Δ ppm = -3.8 ppm.

$^1\text{H}$  NMR

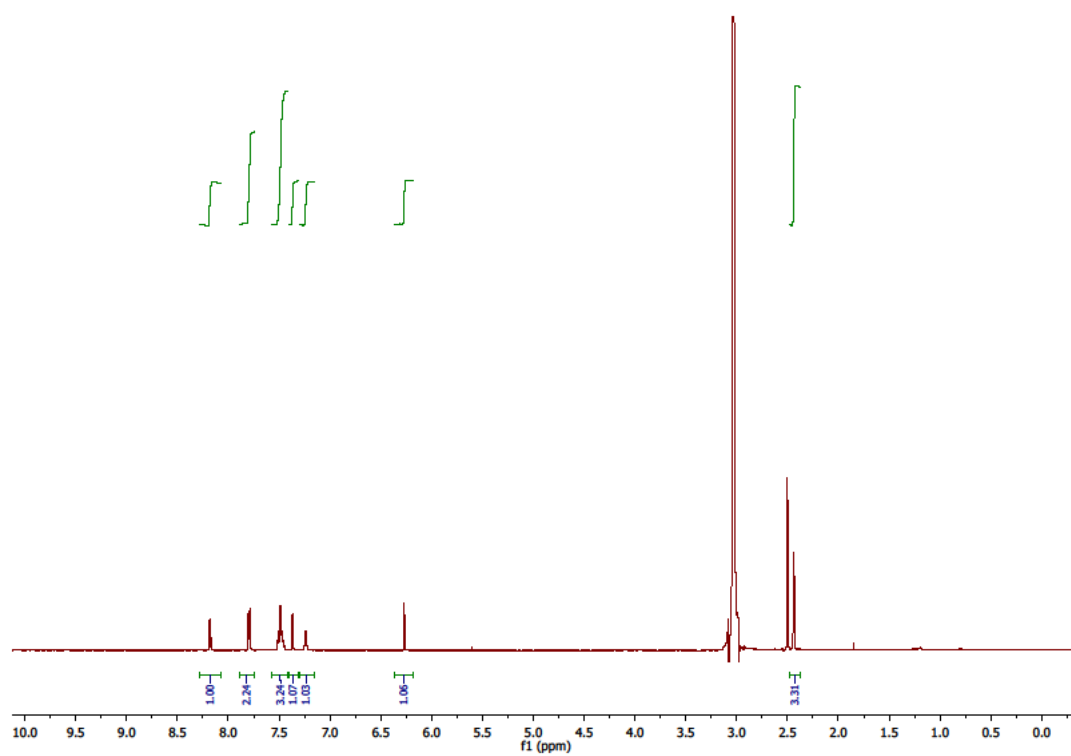

$^{13}\text{C}$  NMR

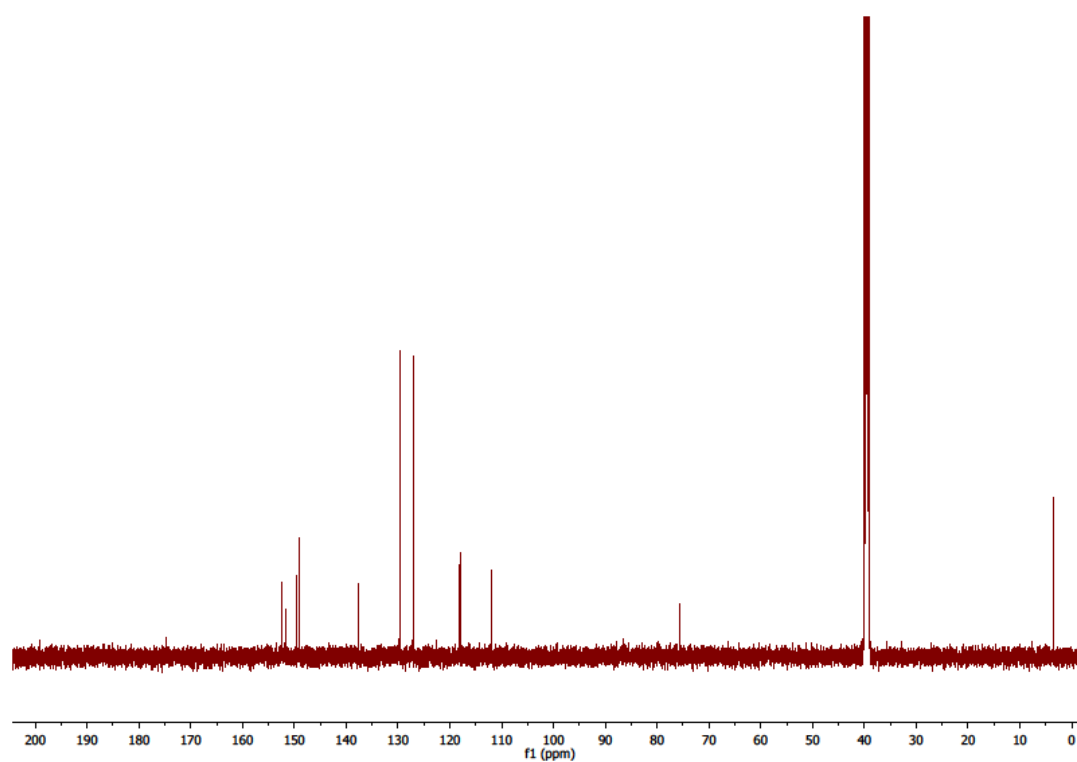

## Ethyl 4-methyl-2-oxo-2H-pyrido[1,2-a]pyrimidine-8-carboxylate (**75**)

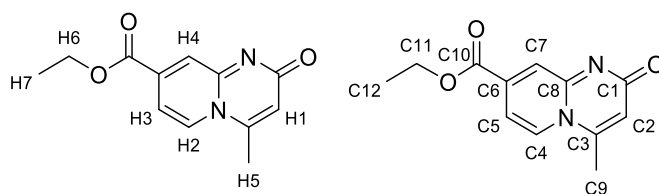

Prepared according to General Method 2 from **50**. The crude product was purified by column chromatography (SiO<sub>2</sub>, 30 g, 19:1 CH<sub>2</sub>Cl<sub>2</sub>: MeOH) to yield a pale yellow solid (0.30 g, 88% purity, 1.15 mmol, 87%). Further purification by preparative HPLC yielded spectroscopically pure material. R<sub>f</sub> = 0.43 (9:1 CH<sub>2</sub>Cl<sub>2</sub>: MeOH). Mpt (CH<sub>2</sub>Cl<sub>2</sub>): darkens >170 °C, decomp, >210 °C. IR ν<sub>max</sub>/cm<sup>-1</sup> (neat): 3330 (w, br), 3098 (w, C-H), 2911 (w, C-H), 2927 (w, C-H), 2870 (w, C-H), 1724 (med, C=O), 1660 (str, C=O), 1640 (str, C=O), 1619 (str, C=C), 1546 (w), 1471 (str, C=C/C=N), 1438 (med, C=C/C=N), 1392 (med), 1365 (med), 1344 (w), 1271 (med), 1258 (med), 1232 (str, C-O), 1188 (w), 1148 (med), 1100 (med), 1057 (w), 1031 (w), 1012 (med). <sup>1</sup>H NMR (500 MHz, d<sup>6</sup>-DMSO): δ<sub>H</sub> 8.30 (1H, d, *J* = 7.4 Hz, H2), δ<sub>H</sub> 7.58 (1H, app dd, *J* = 2.0, 0.5 Hz, H4), δ<sub>H</sub> 7.18 (1H, dd, *J* = 7.4, 2.0 Hz, H3), δ<sub>H</sub> 6.43 (1H, d, *J* = 0.7 Hz, H1), δ<sub>H</sub> 4.36 (2H, q, *J* = 7.1 Hz, H6), δ<sub>H</sub> 2.52 (3H, d, *J* = 0.7 Hz, H5), δ<sub>H</sub> 1.34 (3H, t, *J* = 7.1 Hz, H7). <sup>13</sup>C NMR (125 MHz, d<sup>6</sup>-DMSO): δ<sub>C</sub> 167.3 (C1), δ<sub>C</sub> 163.3 (C10), δ<sub>C</sub> 151.8 (C8), δ<sub>C</sub> 147.0 (C3), δ<sub>C</sub> 136.5 (C6), δ<sub>C</sub> 131.7 (C4), δ<sub>C</sub> 125.4 (C7), δ<sub>C</sub> 115.9 (C2), δ<sub>C</sub> 109.9 (C5), δ<sub>C</sub> 62.2 (C11), δ<sub>C</sub> 18.5 (C9), δ<sub>C</sub> 14.0 (C12). HRMS (FTMS ESI+) *m/z* found [M+H]<sup>+</sup> 233.0911, C<sub>12</sub>H<sub>13</sub>O<sub>3</sub>N<sub>2</sub><sup>+</sup> required 233.0921, Δ ppm = -4.1 ppm.



75\_CARBON.6011.esp

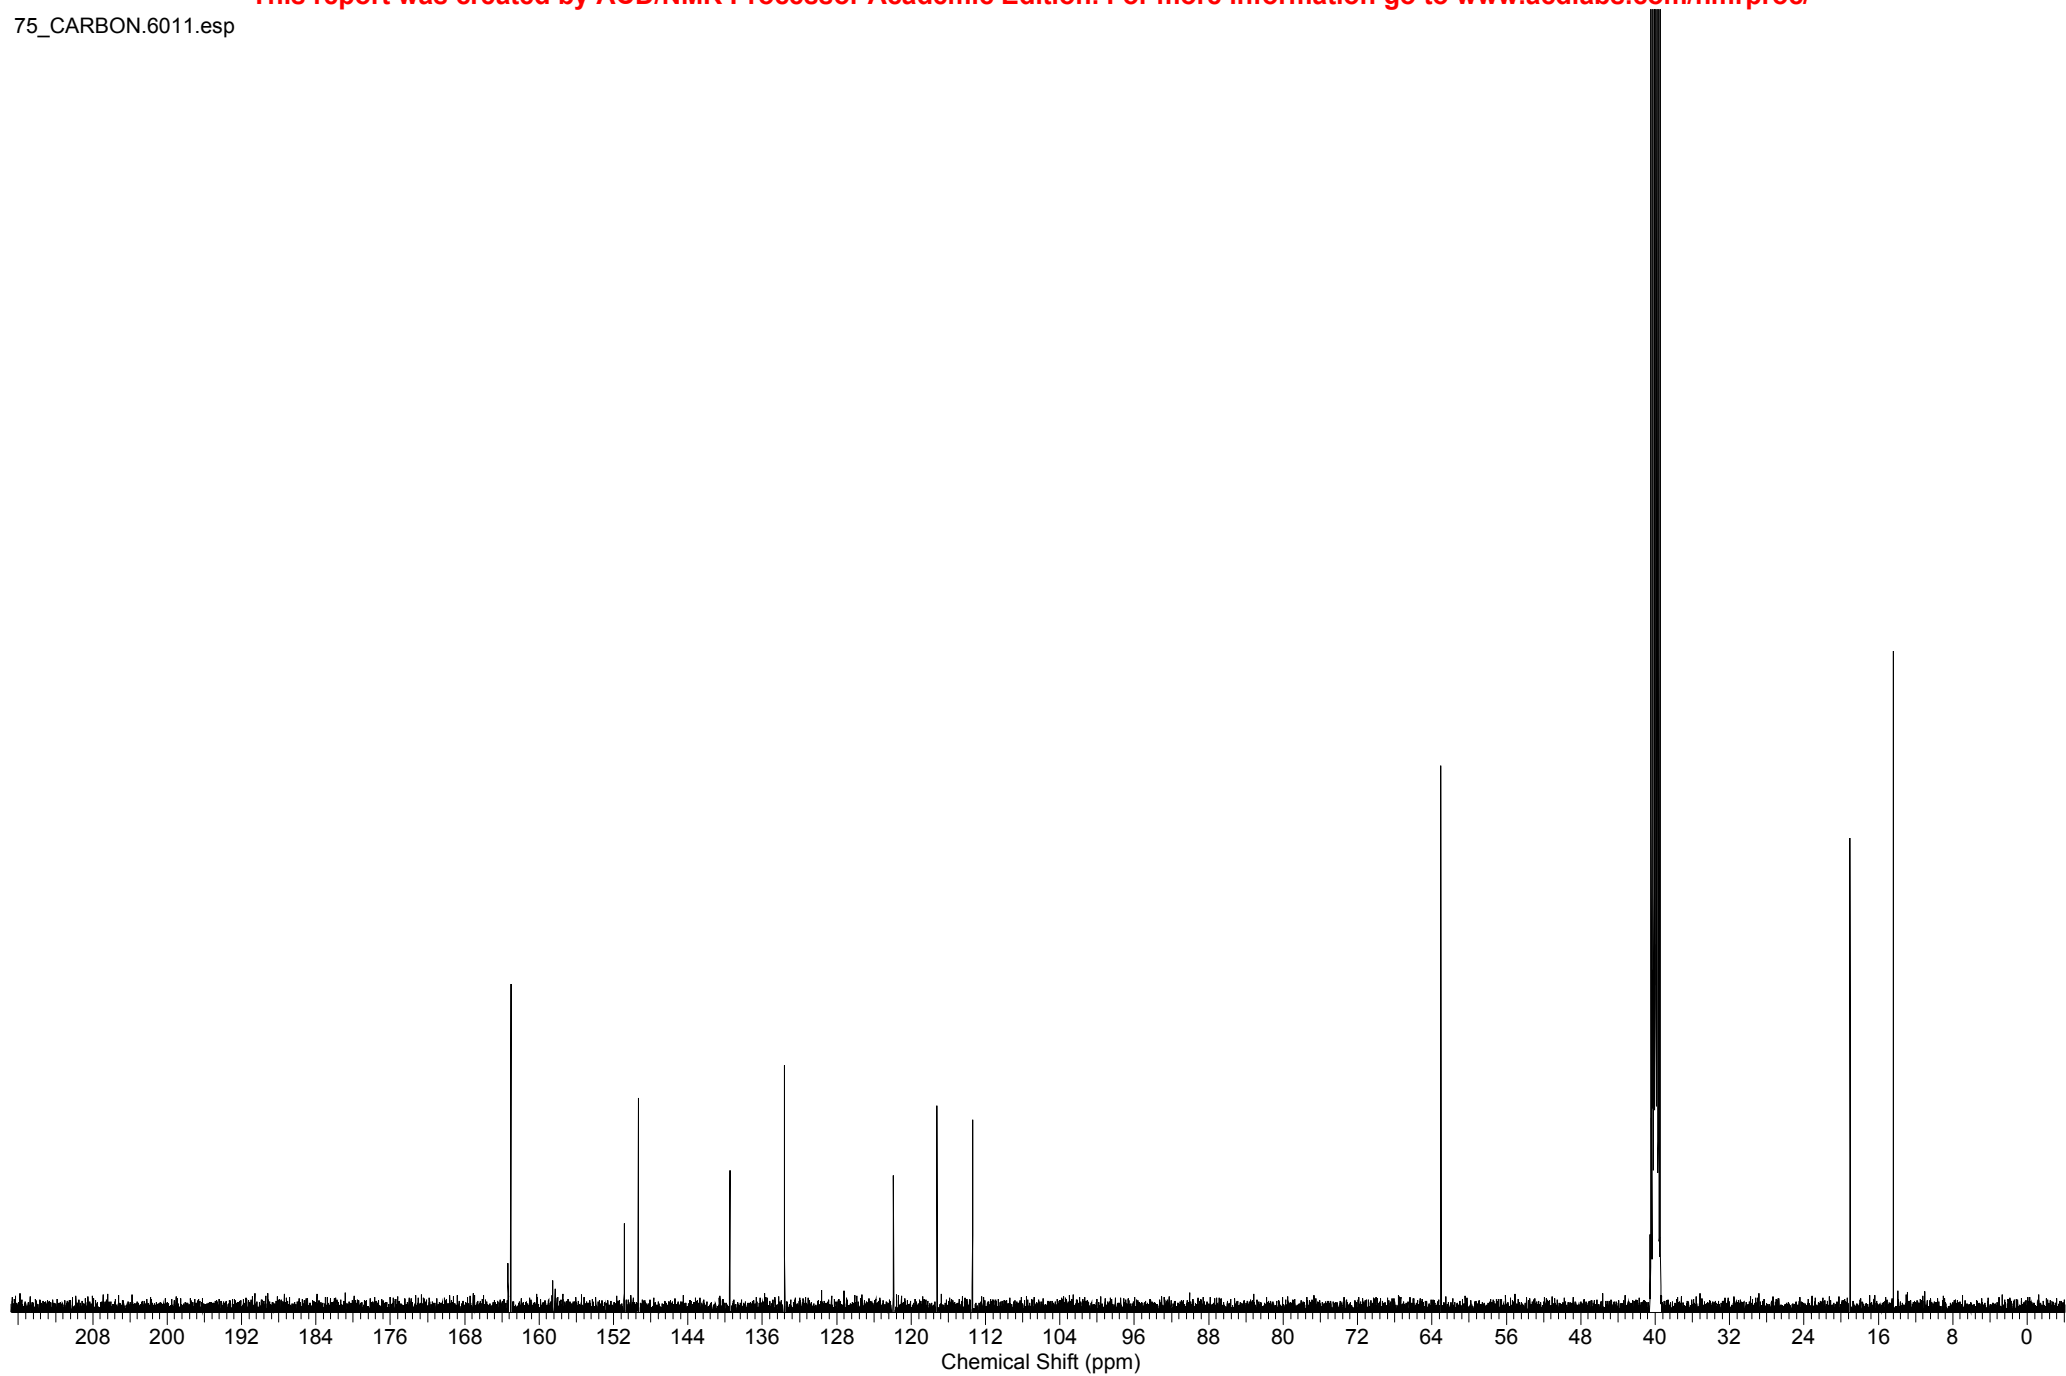

75\_PROTON.010.esp

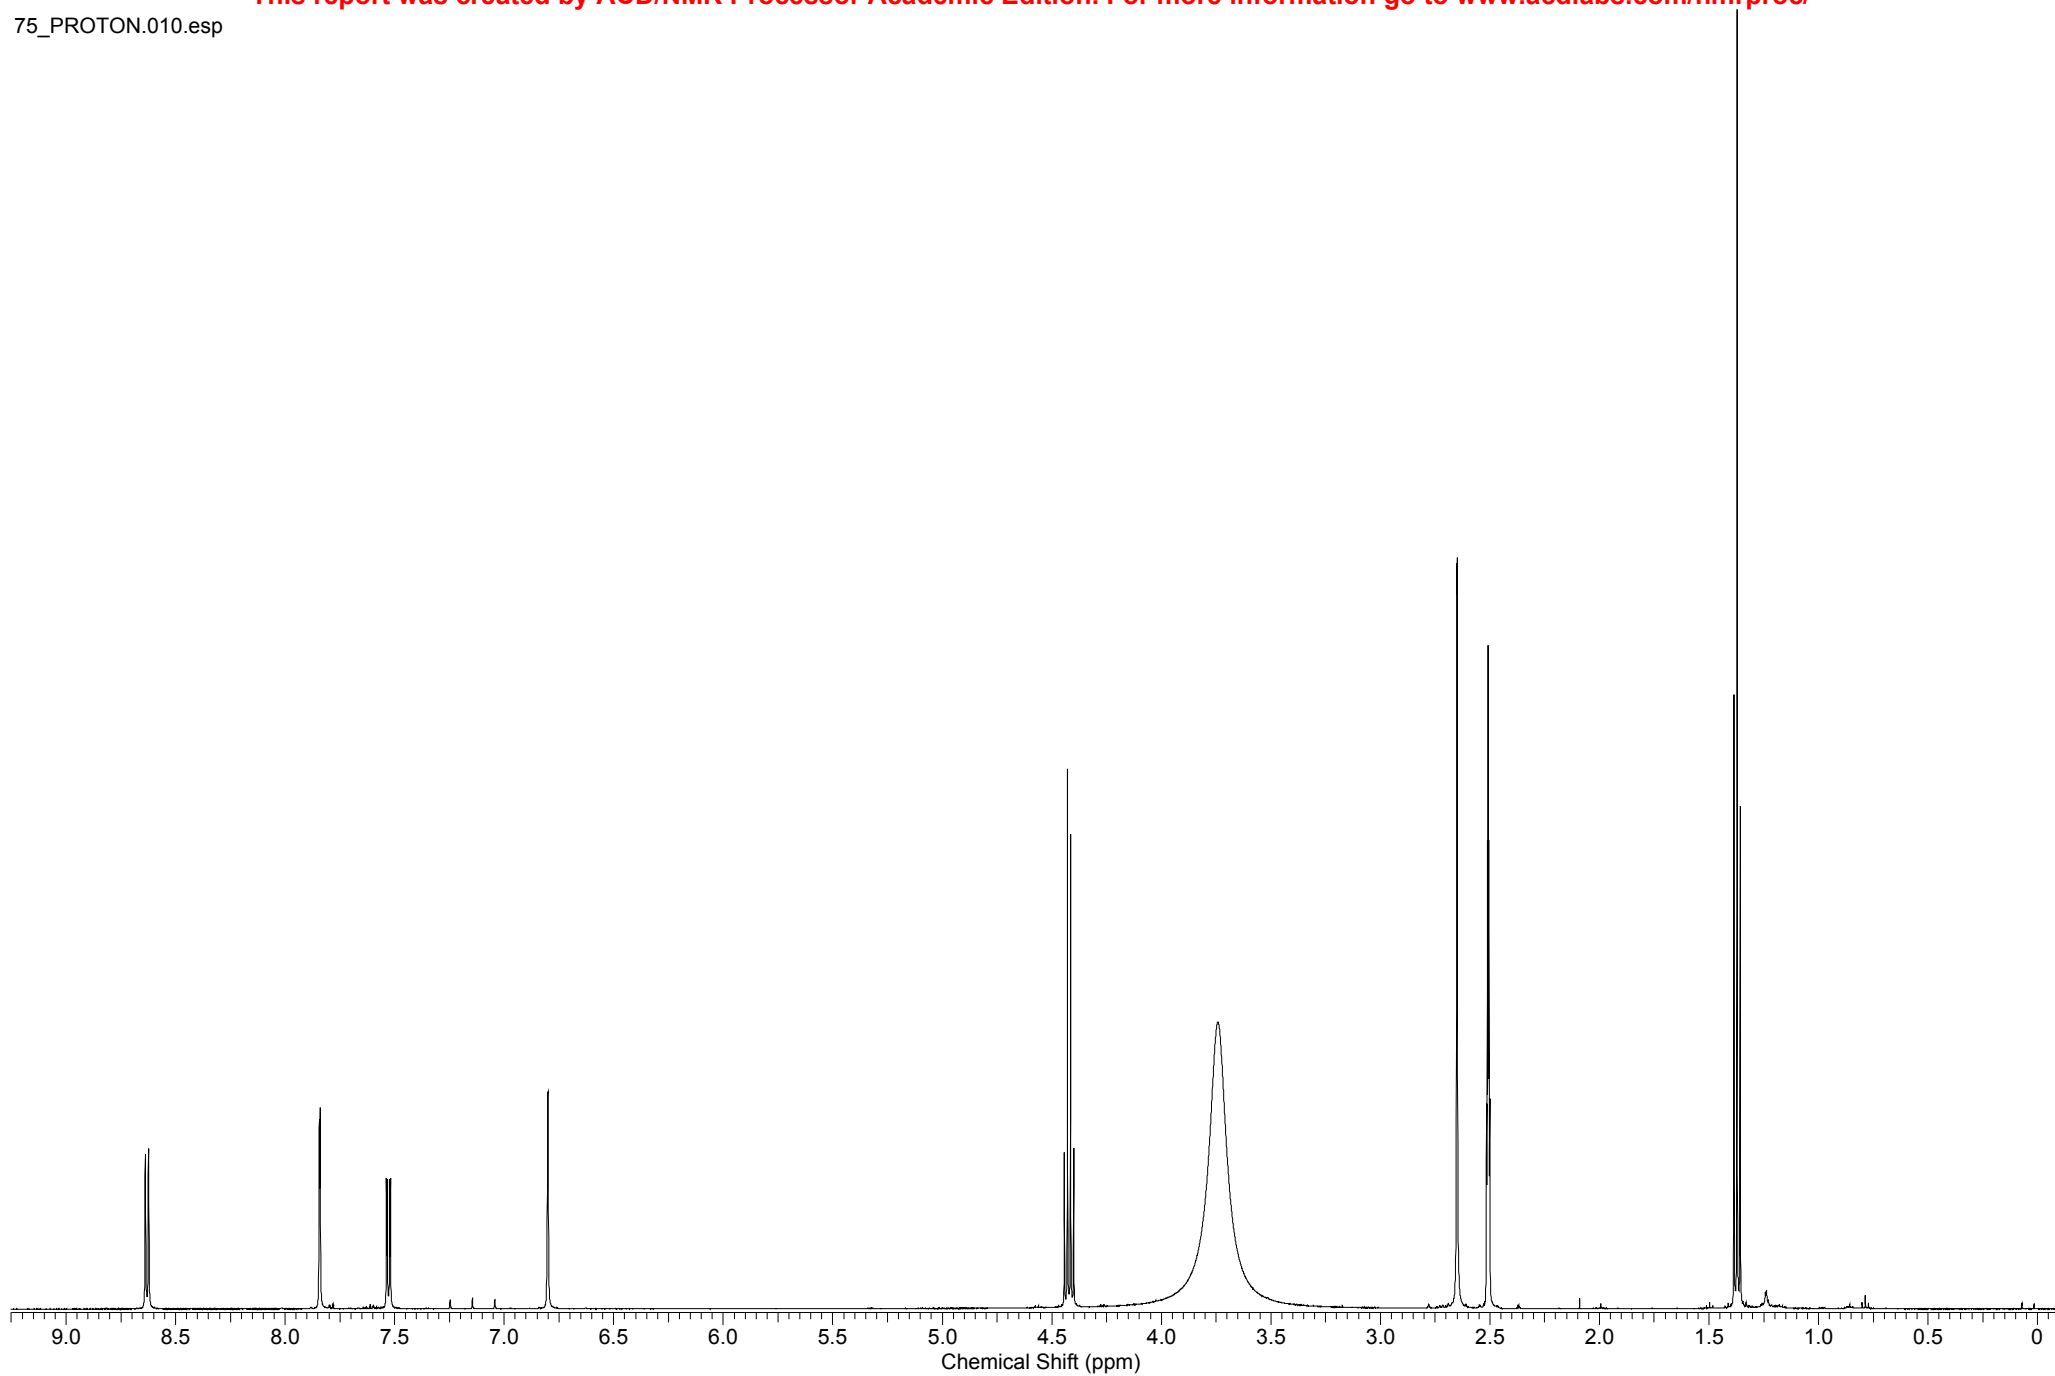

## 8-Methoxy-4-methyl-2H-pyrido[1,2-a]pyrimidin-2-one (76)

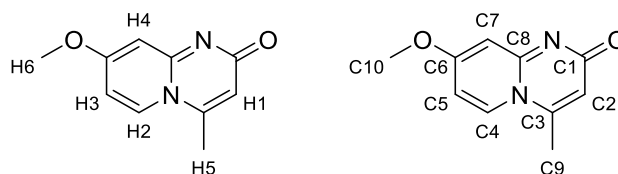

Prepared according to General Method 2 from **51**. The crude product was purified by column chromatography (SiO<sub>2</sub>, 30 g, 92:8 CH<sub>2</sub>Cl<sub>2</sub>: MeOH) to yield a beige solid (quantitative). R<sub>f</sub> = 0.42 (9:1 CH<sub>2</sub>Cl<sub>2</sub>: MeOH). Mpt (CH<sub>2</sub>Cl<sub>2</sub>): darkens >180 °C, melts 201-203 °C. IR ν<sub>max</sub>/cm<sup>-1</sup> (neat): 3488 (w), 3082 (w, C-H), 1642 (str, C=O), 1579 (str, C=C), 1555 (med, C=C), 1456 (str, C=C/C=N), 1445 (str, C=C/C=N), 1395 (str), 1362 (str), 1261 (str), 1223 (str), 1198 (med), 1184 (med), 1152 (w), 1071 (w), 1057 (w), 1006 (med). <sup>1</sup>H NMR (400 MHz, d<sup>6</sup>-DMSO): δ<sub>H</sub> 8.10 (1H, d, *J* = 8.0 Hz, H2), δ<sub>H</sub> 6.67 (1H, dd, *J* = 8.0, 3.2 Hz, H3), δ<sub>H</sub> 6.51 (1H, d, *J* = 3.2 Hz, H4), δ<sub>H</sub> 6.20 (1H, d, *J* = 0.8 Hz, H1), δ<sub>H</sub> 3.90 (3H, s, H6), δ<sub>H</sub> 2.46 (3H, d, *J* = 0.8 Hz, H5). <sup>13</sup>C NMR (100 MHz, d<sup>6</sup>-DMSO): δ<sub>C</sub> 167.4 (C1), δ<sub>C</sub> 164.2 (C6), δ<sub>C</sub> 154.2 (C8), δ<sub>C</sub> 145.8 (C3), δ<sub>C</sub> 131.6 (C4), δ<sub>C</sub> 113.8 (C2), δ<sub>C</sub> 107.2 (C5), δ<sub>C</sub> 99.4 (C7), δ<sub>C</sub> 56.5 (C10), δ<sub>C</sub> 18.5 (C9). HRMS (FTMS ESI+) *m/z* found [M+H]<sup>+</sup> 191.0814, C<sub>10</sub>H<sub>11</sub>O<sub>2</sub>N<sub>2</sub><sup>+</sup> required 191.0815, Δ ppm = -0.4 ppm.

$^1\text{H}$  NMR

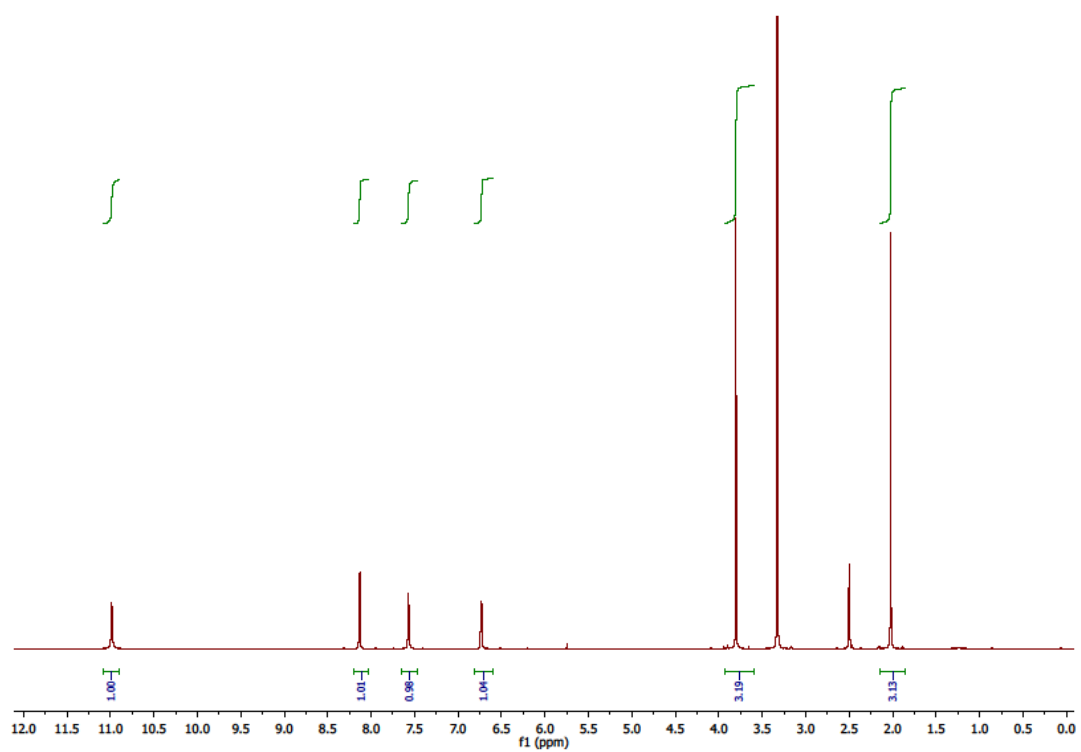

$^{13}\text{C}$  NMR

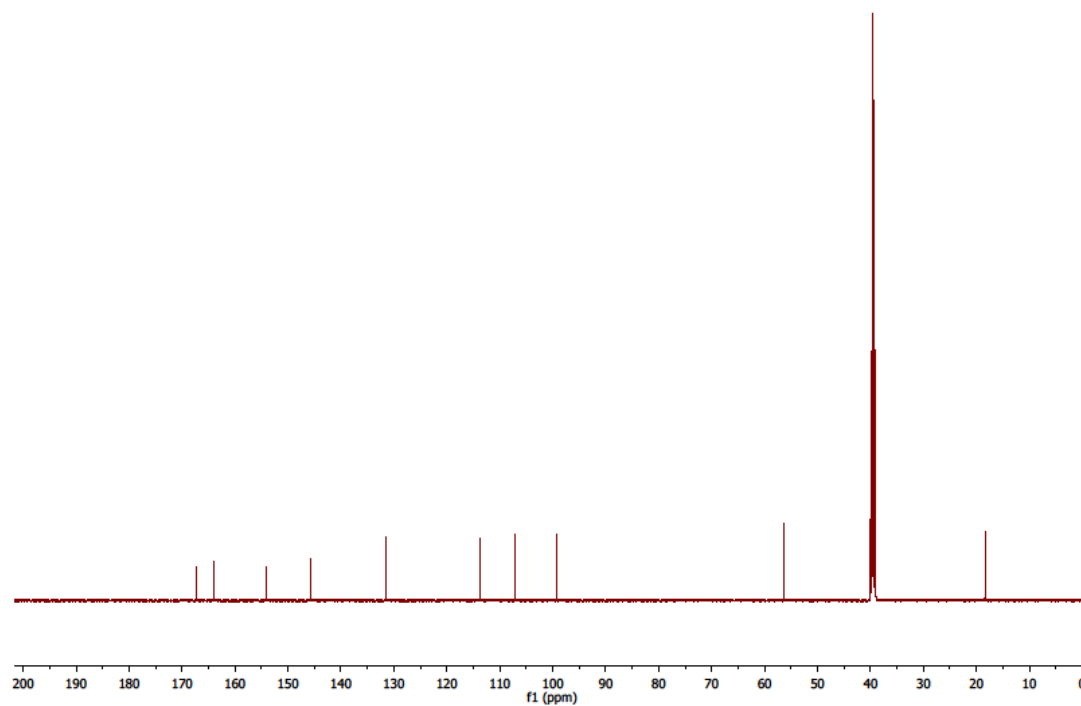

## 7-Methoxy-4-methyl-2*H*-pyrimido[1,2-*b*]pyridazin-2-one (77)

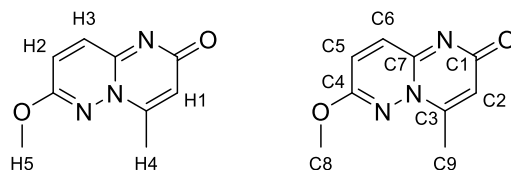

Prepared according to General Method 2 from **52**. The crude product was purified by column chromatography (SiO<sub>2</sub>, 10 g, 19:1 CH<sub>2</sub>Cl<sub>2</sub>: MeOH) to yield an off-white solid (85%). R<sub>f</sub> = 0.38 (9:1 CH<sub>2</sub>Cl<sub>2</sub>: MeOH). Mpt (CH<sub>2</sub>Cl<sub>2</sub>): phase change >170-220 °C then melt/decomposition >255 °C. IR ν<sub>max</sub>/cm<sup>-1</sup> (neat): 3284 (w), 3181 (w), 3100 (w), 3036 (w), 2966 (w, C-H), 2925 (w, C-H), 2864 (w, C-H), 2236 (med, C≡C), 1650 (str, C=O), 1554 (str, C=C), 1515 (str, C=C), 1494 (str, C=C), 1454 (w), 1427 (med), 1398 (w), 1377 (w), 1341 (str), 1330 (str), 1261 (str), 1229 (str), 1109 (str), 1082 (str), 1002 (w). <sup>1</sup>H NMR (400 MHz, d<sup>6</sup>-DMSO): δ<sub>H</sub> 7.57 (1H, d, *J* = 8.6 Hz, H2), δ<sub>H</sub> 7.39 (1H, d, *J* = 8.6 Hz, H3), δ<sub>H</sub> 6.34 (1H, s, H1), δ<sub>H</sub> 3.97 (3H, s, H5), δ<sub>H</sub> 2.50 (3H, s, H4). <sup>13</sup>C NMR (100 MHz, d<sup>6</sup>-DMSO): δ<sub>C</sub> 167.5 (C4), δ<sub>C</sub> 157.0 (C1), δ<sub>C</sub> 150.1 (C3 or C7), δ<sub>C</sub> 150.0 (C3 or C7), δ<sub>C</sub> 135.6 (C5), δ<sub>C</sub> 123.9 (C6), δ<sub>C</sub> 113.7 (C2), δ<sub>C</sub> 54.8 (C8), δ<sub>C</sub> 17.4 (C9). HRMS (FTMS ESI+) *m/z* found [M+H]<sup>+</sup> 192.0780, C<sub>9</sub>H<sub>10</sub>N<sub>3</sub>O<sub>2</sub><sup>+</sup> required 192.0773, Δ ppm = 3.6 ppm.

$^1\text{H}$  NMR

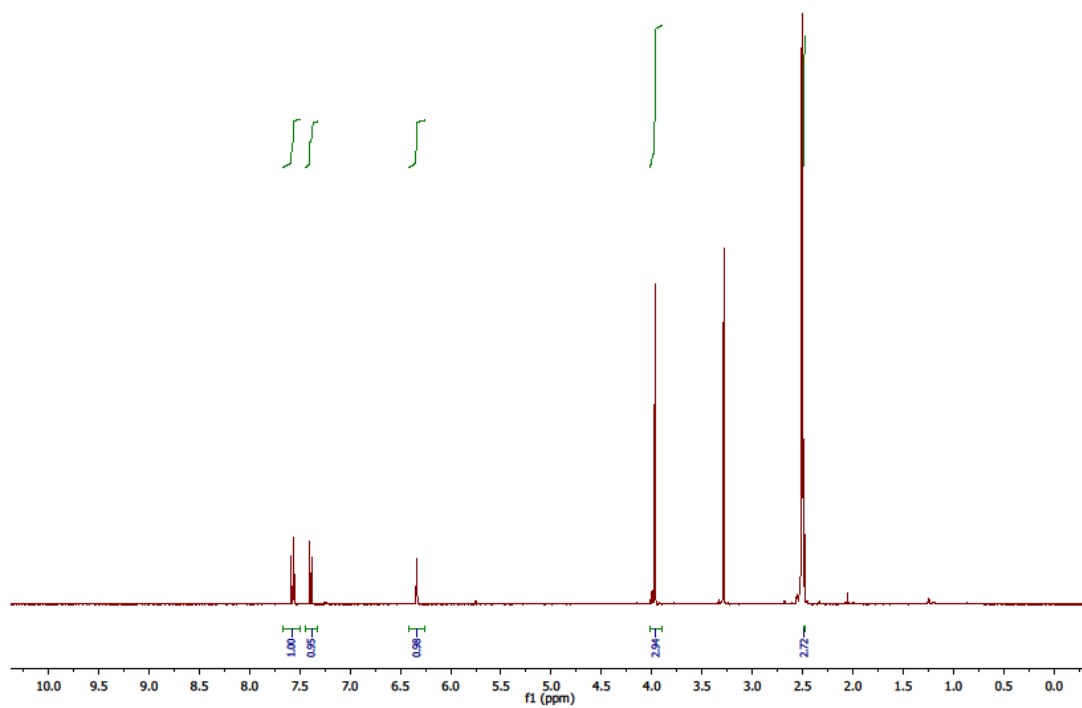

$^{13}\text{C}$  NMR

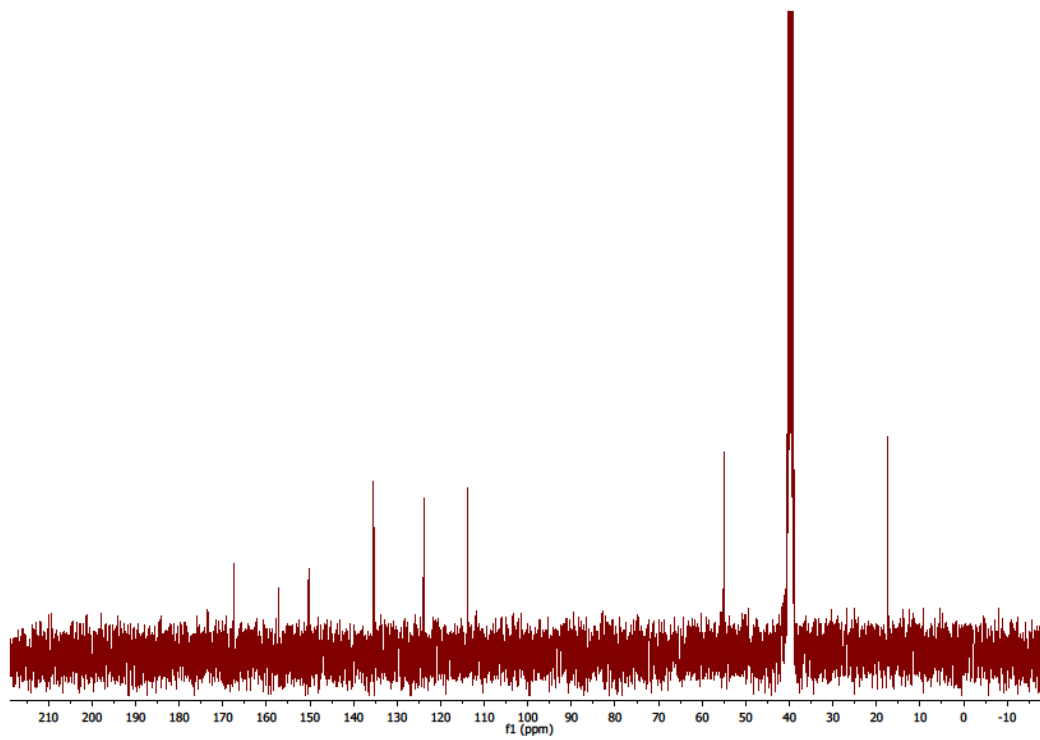

#### 4-Methyl-2*H*-pyrazino[1,2-*a*]pyrimidin-2-one (**78**)

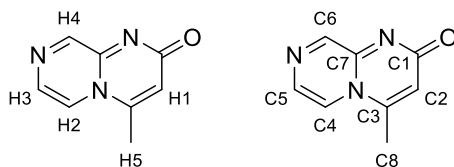

Prepared according to General Method 2 from **53**. The crude product was purified by Combiflash Companion (SiO<sub>2</sub>, 12 g, 0-10% MeOH in CH<sub>2</sub>Cl<sub>2</sub>) to yield a light brown solid (quantitative). R<sub>f</sub> = 0.06 (9:1 CH<sub>2</sub>Cl<sub>2</sub>: MeOH). Mpt (H<sub>2</sub>O/MeCN): decomp. >165 °C. IR ν<sub>max</sub>/cm<sup>-1</sup> (neat): 3127 (w, C-H), 3038 (w, C-H), 1651 (str, C=O), 1607 (str), 1513 (str), 1485 (str), 1448 (w), 1408 (w), 1395 (str), 1371 (med), 1312 (w), 1279 (med), 1250 (w), 1239 (w), 1191 (med), 1109 (w), 1062 (med), 1042 (w). <sup>1</sup>H NMR (400 MHz, d<sup>6</sup>-DMSO): δ<sub>H</sub> 8.66 (1H, d, *J* = 1.2 Hz, H4), δ<sub>H</sub> 8.11 (1H, dd, *J* = 4.9, 1.2 Hz, H3), δ<sub>H</sub> 7.88 (1H, d, *J* = 4.9 Hz, H2), δ<sub>H</sub> 6.53 (1H, d, *J* = 1.0 Hz, H1), H5 obscured by DMSO signal. <sup>13</sup>C NMR (100 MHz, d<sup>6</sup>-DMSO): δ<sub>C</sub> 167.6 (C1), δ<sub>C</sub> 151.1 (C6), δ<sub>C</sub> 146.4 (C3), δ<sub>C</sub> 145.1 (C7), δ<sub>C</sub> 128.2 (C5), δ<sub>C</sub> 120.8 (C4), δ<sub>C</sub> 116.8 (C2), δ<sub>C</sub> 17.3 (C8). HRMS (FTMS ESI+) *m/z* found [M+H]<sup>+</sup> 162.0657, C<sub>8</sub>H<sub>8</sub>N<sub>3</sub>O<sup>+</sup> required 162.0662, Δ ppm = -3.9 ppm.

$^1\text{H}$  NMR

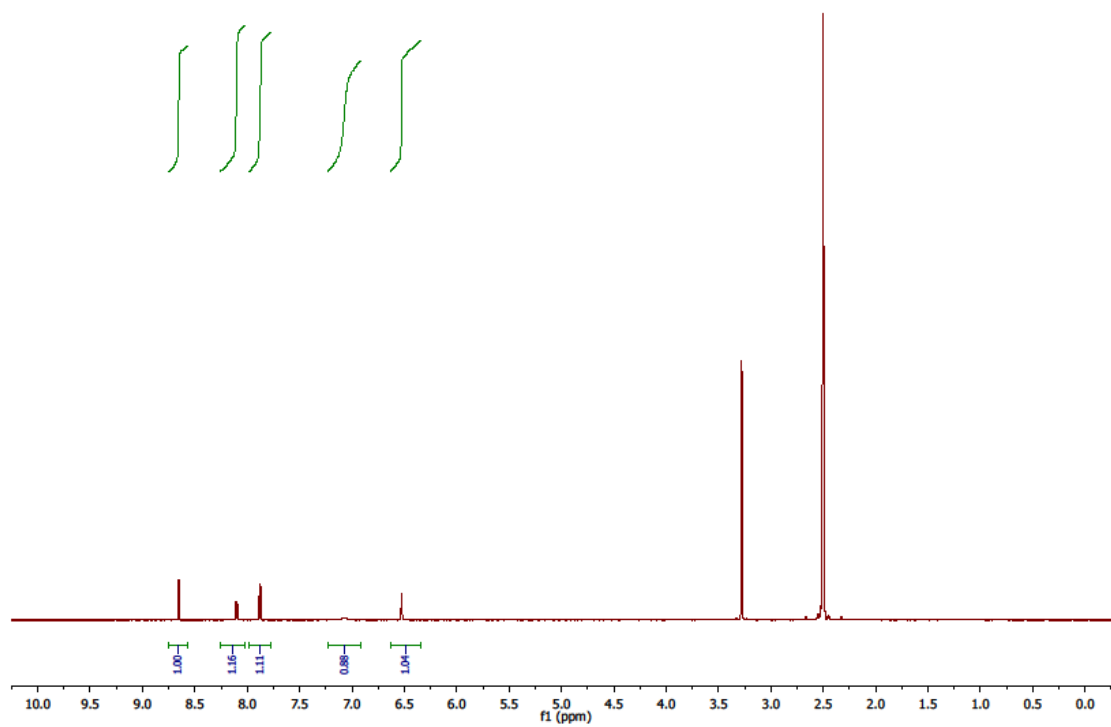

$^{13}\text{C}$  NMR

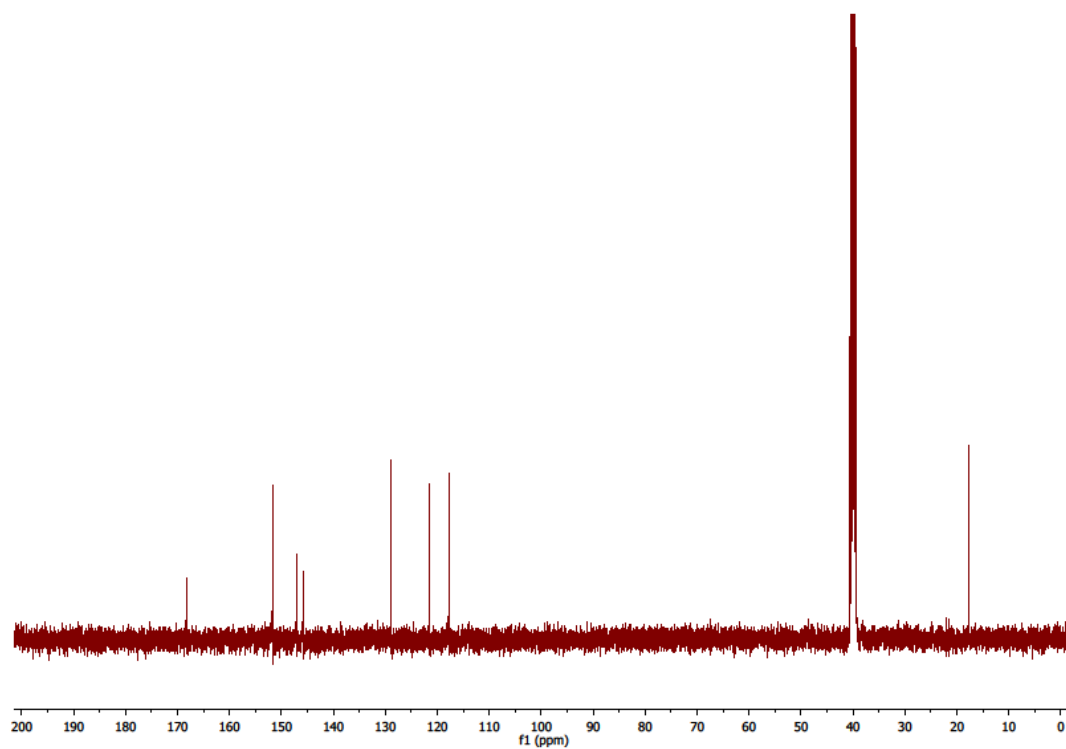



## 8-Methoxy-4-methyl-2*H*-pyrimido[1,6-*a*]pyrimidin-2-one (79)

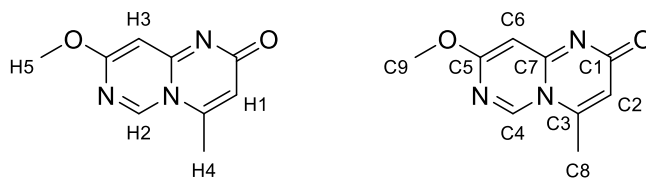

Prepared according to General Method 2 from **55**. The crude product was spectroscopically pure and used without further purification as a yellow solid (quantitative).  $R_f = 0.23$  (1:1 40-60 petroleum ether: EtOAc). Mpt ( $\text{CH}_2\text{Cl}_2$ ): 183-185 °C. IR  $\nu_{\text{max}}/\text{cm}^{-1}$  (neat): 3057 (w, C-H), 1691 (str, C=O), 1618 (str), 1573 (str, C=C/C=N), 1546 (w), 1463 (str), 1394 (str), 1288 (w), 1244 (str), 1231 (str, C-O), 1195 (w), 1177 (w), 1158 (med), 1093 (str), 1011 (med).  $^1\text{H}$  NMR (400 MHz,  $d^6$ -DMSO):  $\delta_{\text{H}}$  9.45 (1H, s, H2),  $\delta_{\text{H}}$  6.75 (1H, s, H3),  $\delta_{\text{H}}$  6.13 (1H, s, H1),  $\delta_{\text{H}}$  3.99 (3H, s, H5),  $\delta_{\text{H}}$  2.30 (3H, s, H4).  $^{13}\text{C}$  NMR (100 MHz,  $d^6$ -DMSO):  $\delta_{\text{C}}$  167.7 (C5),  $\delta_{\text{C}}$  166.6 (C1),  $\delta_{\text{C}}$  156.7 (C3),  $\delta_{\text{C}}$  153.1 (C7),  $\delta_{\text{C}}$  143.5 (C4),  $\delta_{\text{C}}$  101.6 (C2),  $\delta_{\text{C}}$  94.5 (C6),  $\delta_{\text{C}}$  56.2 (C9),  $\delta_{\text{C}}$  24.5 (C8). HRMS (TOF ES+)  $m/z$  found  $[\text{M}+\text{H}]^+$  192.0780,  $\text{C}_9\text{H}_{10}\text{O}_2\text{N}_3^+$  required 192.0773,  $\Delta$  ppm = -3.6 ppm.

$^1\text{H}$  NMR

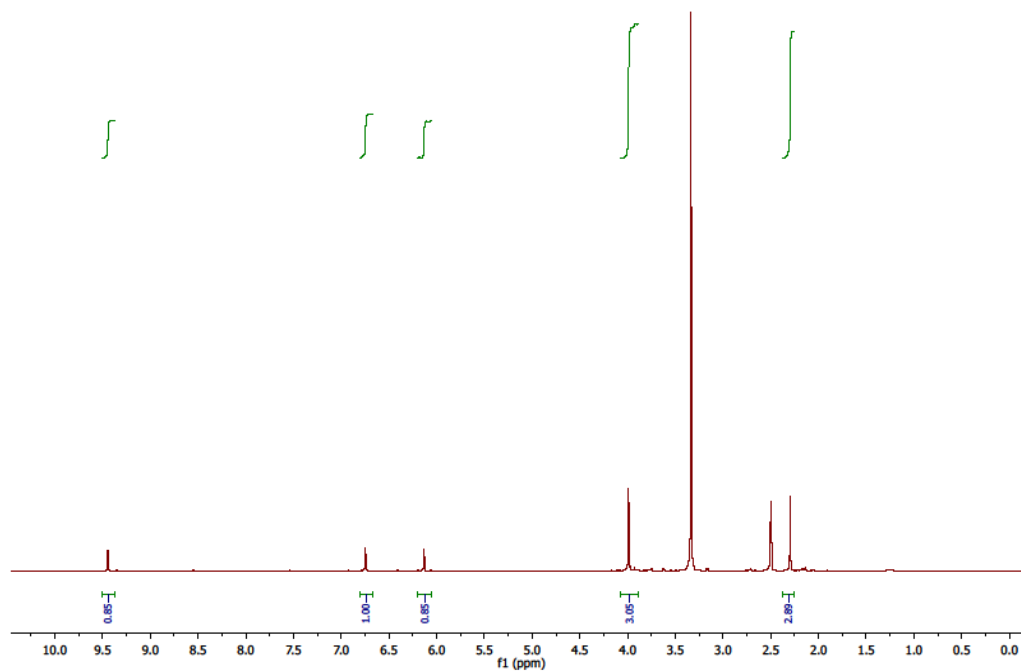

$^{13}\text{C}$  NMR

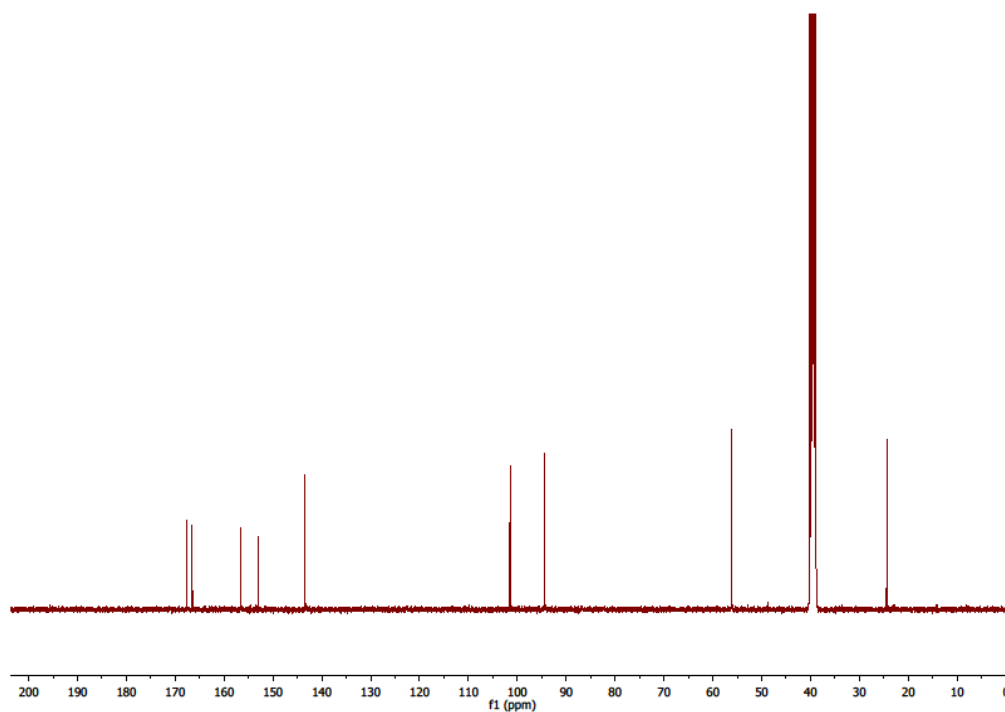

## 1-Methyl-3H-pyrimido[1,2-a]quinolin-3-one (**80**)

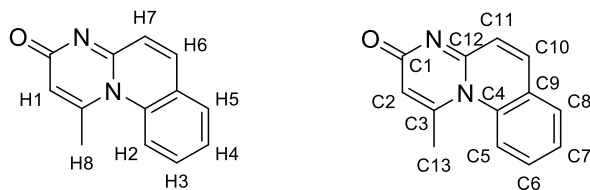

Prepared according to General Method 2 from **57**. The crude product was purified by column chromatography (SiO<sub>2</sub>, 20 g, 97:3 then 19:1 CH<sub>2</sub>Cl<sub>2</sub>: MeOH) to yield a brown wax (50%). R<sub>f</sub> = 0.76 (9:1 CH<sub>2</sub>Cl<sub>2</sub>: MeOH). IR  $\nu_{\text{max}}/\text{cm}^{-1}$  (neat): 3390 (w, br, C-H), 3053 (w, C-H), 2980 (w, C-H), 1628 (str, C=O), 1598 (str, C=C), 1561 (w), 1516 (str, C=C), 1470 (med), 1441 (str), 1407 (med), 1389 (med), 1369 (med), 1291 (w), 1262 (w), 1219 (w), 1188 (w), 1164 (w), 1138 (w), 1049 (w), 1025 (w), 1006 (w). <sup>1</sup>H NMR (500 MHz, CDCl<sub>3</sub>):  $\delta_{\text{H}}$  7.72-7.66 (3H, m, H2+H5+H6),  $\delta_{\text{H}}$  7.56 (1H, ddd,  $J$  = 8.7, 7.3, 1.5 Hz, H3),  $\delta_{\text{H}}$  7.47 (1H, app td,  $J$  = 7.3, 0.9 Hz, H4),  $\delta_{\text{H}}$  7.11 (1H, d,  $J$  = 9.3 Hz, H7),  $\delta_{\text{H}}$  6.31 (1H, d,  $J$  = 0.7 Hz, H1),  $\delta_{\text{H}}$  2.68 (3H, d,  $J$  = 0.6 Hz, H8). <sup>13</sup>C NMR (125 MHz, CDCl<sub>3</sub>):  $\delta_{\text{C}}$  168.2 (C1),  $\delta_{\text{C}}$  153.1 (C12),  $\delta_{\text{C}}$  147.7 (C3),  $\delta_{\text{C}}$  136.2 (C10),  $\delta_{\text{C}}$  134.4 (C4),  $\delta_{\text{C}}$  129.0 (C8),  $\delta_{\text{C}}$  128.9 (C6),  $\delta_{\text{C}}$  126.4 (C7),  $\delta_{\text{C}}$  125.0 (C9),  $\delta_{\text{C}}$  124.4 (C11),  $\delta_{\text{C}}$  120.7 (C5),  $\delta_{\text{C}}$  115.8 (C2),  $\delta_{\text{C}}$  23.1 (C13). HRMS (TOF ES+)  $m/z$  found [M+H]<sup>+</sup> 211.0879, C<sub>13</sub>H<sub>11</sub>ON<sub>2</sub><sup>+</sup> required 211.0871,  $\Delta$  ppm = 3.8 ppm.

$^1\text{H}$  NMR

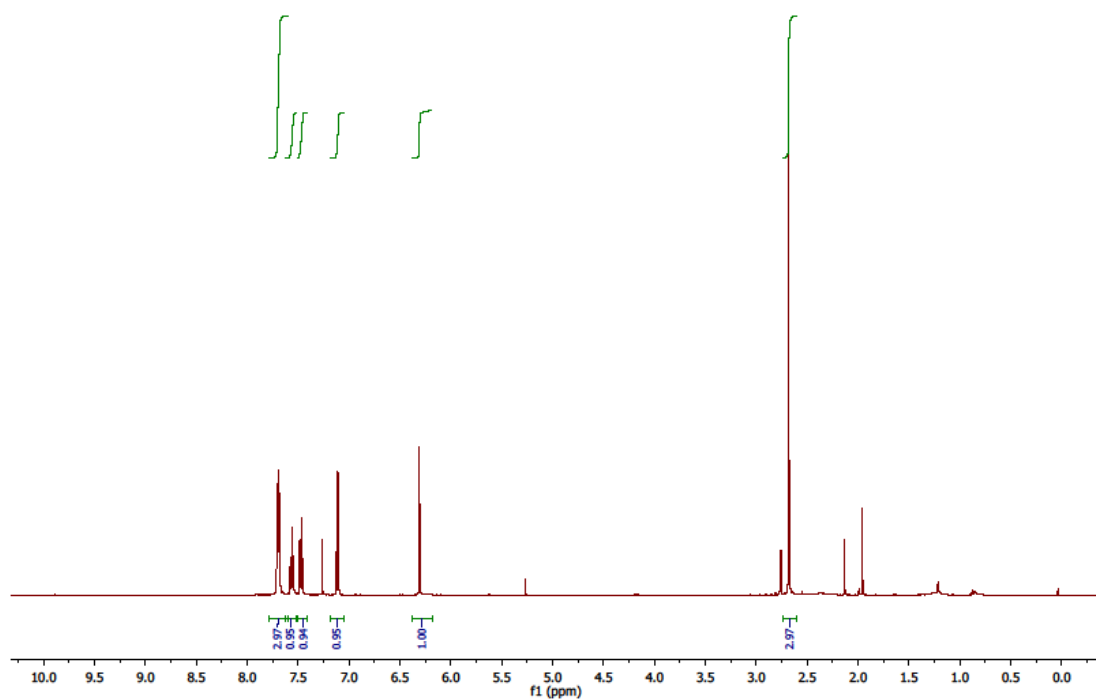

$^{13}\text{C}$  NMR

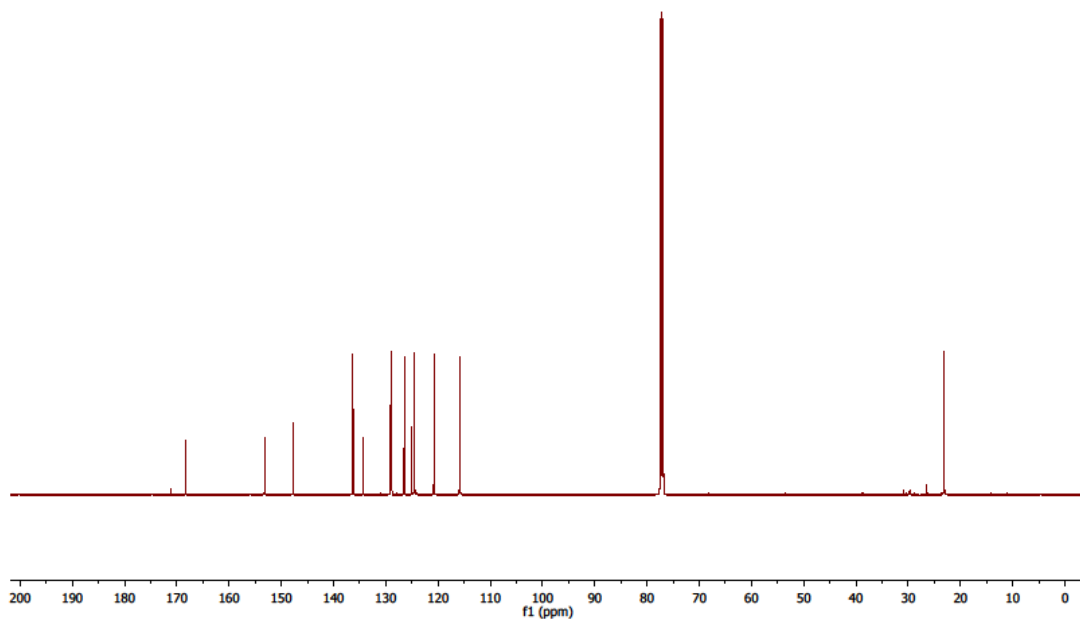

## References

1. A. F. Burchat, J. M. Chong and N. Nielsen, *J. Organomet. Chem.*, 1997, **542**, 281-283.
2. G. C. B. Harriman, S. Chi, M. Zhang, A. Crowe, R. A. Bennett and I. Parsons, *Tetrahedron Lett.*, 2003, **44**, 3659-3662.
3. C. R. Hauser and M. J. Weiss, *J. Org. Chem.*, 1949, **14**, 453-459.
